# Supplementary material for: Gender-specific linkages: frailty, polypharmacy, anti-cholinergic burden, and 5-year mortality risk—a real-world analysis
Source: PeerJ. 2023 Nov 21;11:e16262. doi: 10.7717/peerj.16262 (PMC10668851; doi:10.7717/peerj.16262)
Supplement: Supplemental Information 1 [file peerj-11-16262-s001.xlsx]

## Sheet: Data_0906
age	gender	educational level	body height	body weight	BMI	MMSE	GDS-5	ADL	IADL	TUG	HGS	Morse	FRT	MNA-SF	Polypharmacy	CHS	DM	HTN	CVA	CAD	CKD	Dementia	Parkinson	COPD	CCI
87	0	4	171	61.9	21.1689	19	0	100	8	24	24.6	0	13.6	13	1	3	0	1	0	0	0	1	0	0
85	1	4	162	62	23.6244	23	0	70	1		32.5	50		13	8		1	1	0	0	0	1	0	0
66	0	5	169	82.4	28.8505	30	0	100	8	6.01	36	15	29	14	0	0	0	0	0	0	0	0	0	0	0
84	0	3	174.3	48.1	15.8325	15	3	65	0	20.62	22.6	55	12.4	7	4	4	0	0	0	0	0	1	0	0
89	0	5	159.8	59.5	23.3004	24	4	80	2	20.12		80	23.5	5	6	4	0	0	0	0	0	0	0	0	3
88	0	5				30	0	95	8	12.78	23.4	15	25	11	0	1	0	0	0	0	0	1	0	1	3
91	0	5	162	58	21.6311	10	0	25	0		12.4	65		10	6	5	0	1	1	1	1	0	0	0	4
70	0	4	173	84	28.07	30	1	100	8	15.15	48.87	15	22.83	10	9	0	1	1	0	1	1	0	0	0	2
80	0	3	159	55	21.7555	24	0	100	7	7.44	27	15	23	13	4	1	1	0	0	0	0	0	0	0
84	0	5	160	47.6	18.5938			0	0			30		6	3		0	1	0	0	1	1	0	0
84	0	5				28	3	95	7			15		11	4		0	0	0	1	1	0	0	0
84	0	5	171	76.2	26.0593	25	0	100	7	8.25	41.1	15	34	14	2	0	0	1	0	0	1	0	0	0	3
94	0	5				27	0	90	4	20.1	27.73	40		14	7	4	0	1	0	0	1	0	1	0	0
88	0	4	154.6	54.7	22.8859	29	0	100	6	15	21.3	15	11.6	14	5	2	0	1	0	1	0	0	0	0	1
89	0	1	164.5	86	31.7809	20	4	45	2		13.4	55		12	6		0	1	0	1	1	0	0	0
88	0	4	168	55	19.487	27	2	60	7	22.2	14.4	30	15.67	12	6	4	1	1	0	0	0	0	0	0	3
83	0	5	169.5	61.9	21.5452	23	0	100	6	9.2	33.9	15	32	13	2	0	1	1	0	0	0	1	0	0	3
95	0	2	164	63	23.4236	25	0	70	2		15.6	40		12	20	3	1	0	1	0	1	0	0	0	4
88	0	4	164	55	20.4491	27	0	10	4	9.18	23.9	10	17	14	3	2	1	0	0	0	0	0	0	0	0
88	0	4	162	62	23.6244	27	0	100	5	10.57	29.3	15	36	12	12	1	1	1	1	1	1	0	0	0	3
85	0	3	161.4	76	29.1747	29	0	100	6	24	24.3	40	7.8	14	10	4	1	1	0	0	1	0	0	0	2
95	0	5	165	74	27.1809	20	1	55	1		32.1	40		13	4	3	0	1	0	0	0	0	0	0	1
74	1	5	165	65	23.8751	28	0	90	8	16.63	29.3	15		14	2	3	1	1	0	0	0	0	0	0
65	0	5	176	109	35.1885	30	1	100	7	12.34	40.8	15	29	14	6	1	1	1	0	0	1	0	0	0	4
72	0	1	161.4	78.1	29.98	19	0	100	5	8.25	39.63	15	26.33	14	6	0	1	1	1	0	1	0	0	0	3
65	0	4	164	68	25.2826	28	0	100	5	10.27	27.1	0	24	12	3	1	1	0	0	0	0	0	0	0	1
91	0	1				23	2	95	3		24.7	50		11	4	5	1	0	0	0	1	0	0	1	2
87	0	1	168	72	25.5102	24	0	90	6	15	21.3	30	11	14	11	3	0	1	0	1	1	0	0	1	0
92	1	2	163.4	65.9	24.6821	29	4	85	4		23.3	65		13	10	3	1	1	0	1	1	0	0	0	3
92	0	5	161.2	62	23.8595	22	0	70	0		21.8	50		14	8		0	1	0	1	1	0	0	0
74	0	4	158	61	24.4352	30	0	100	7	12	36.8	15	23	14	2	1	1	1	0	0	0	0	0	0	2
90	0	5	154	60	25.2994	25	1	100	4	22.4	17.4	25		14	13	3	0	1	1	1	1	0	0	0	2
72	0	4	172	88	29.7458	23	1	80	5	11.87	19.8	15		14	12	3	1	1	0	0	1	0	0	0	5
76	0	5	166.5	78.9	28.4609	29	0	100	7	13.03	25.2	15	32.6	12		3	0	1	0	0	1	0	0	0	1
90	0	4	155	62	25.81	27	1	85	2		20	40		14	6	2	1	1	0	1	0	0	1	0	3
69	0	5	175	69	22.5306	28	5	95	6	19.79	21.8	25	38.8	7	3	5	1	1	0	1	1	0	0	0	7
76	0	5	166	68	24.677	28	4	90	7	21.31	25	80		12	1	3	0	0	0	0	0	0	0	0	1
90	0	3	158.7	51.9	20.6069	26	1	95	7	8.25	33.7	15	19	12	3	0	0	0	0	0	0	0	0	0	1
89	1	3	165	63	23.1405		3	70	2			65		11	1		0	0	0	0	0	0	0	0
90	0	5	163	61	22.9591	27	0	95	8	20		30		13	10		1	1	0	0	1	0	0	0
89	0		160	57.8	22.5781	30	1	100	7	18	25.7	15	17	14	15	3	0	1	1	1	1	0	0	1	4
79	0	3	159.9	51.2	20.025	27	0	100	7	18.72	29.5	15	20	12	3	1	0	1	1	0	0	0	0	1	3
99	0	4	160	50	19.5312	20	2	80	3		19.7	65		9	2	5	0	0	1	0	0	0	0	1	2
73	0	4	179	77.5	24.18		1	80	3	30.6	21.6	75		14	7	3	1	1	1	0	0	0	0	0
88	0	4				13		30	0			50		8	7		0	1	0	0	1	1	0	1
91	1	5	162	66	25.1486	20	0	95	0		23.7	30		13	5		0	1	1	0	1	1	0	0
66	0	5	182.8	86.3	25.8261	30	0	100	6	6.05	42.3	0	32	14	0	0	0	1	0	0	1	0	0	0	1
88	0	1	161.5	59	24.3865	21	1	90	8	25		30		13	9		1	1	0	1	0	0	0	0
86	0	2				9	4	25	0		14.3	35		10	2		0	0	0	0	1	1	1	0
92	0	0					3	0	0		6.3	15		8	5	3	1	1	0	0	1	0	0	0	5
70	0	4	169	65	22.7583	28	1	95	7	8.22	27.7	15	40	14	5	0	1	0	1	0	0	0	0	0	1
89	0	4	149	61	27.4762	11	3	40	0		12.2	15		14	8	4	0	1	1	1	0	1	0	1	2
88	0	5	166.8	52	18.6901	24	2	45	1		26.2	35		5	10	5	0	0	0	0	0	0	1	0	0
80	0	2	172	75	25.3515	25	2	100	8	10.77	34.1	40	20	11	4	2	0	1	1	1	0	0	0	0	2
90	0	5	158.6	70.3	27.9479	26	0	100	8	14.03	23.3	15		14	8	1	0	1	0	0	0	0	0	0	1
79	0	2	164	57	21.1927			35	0			15		12	7		1	0	0	0	0	1	0	1
83	0	3				9	1	15	0		19.6	50		6	4		0	1	0	0	0	0	0	0
92	0	0	158	53	21.2306	12	1	70	1	32.9	19.4	40	9	10	5	5	1	1	0	0	0	1	0	1	3
90	0	3	166.8	75	26.9569	29	0	100	5		23.3	40		14	8	3	0	0	0	1	0	0	0	0	2
86	0	1	166.3	59.2	21.4061	23	3	80	5	12		15		10	9		1	0	1	1	0	0	1	0
86	0	4	164	61	22.68	28	0	100	8	12	20.43	30	14	13	3	1	1	1	0	0	0	0	0	0	2
97	0	0	165	55	20.202	16	3	85	8	14	22.63	15		11	11	1	0	1	0	0	0	0	0	0	2
93	0	2	157	56	22.719	20	4	85	1		20.1	80		9	3	3	0	1	0	1	0	1	0	1	3
85	0	5	170	84	29.07	22	1	75	1		27.2	50		14	13		1	1	0	1	0	0	0	0
83	0	3	172	62.5	21.12	25	4	95	8	30	22.9	40		12	8	1	1	1	0	1	1	0	0	0	3
93	0	1					2	95	3	20.31	17	40		13	9	5	1	1	0	1	1	1	0	0	3
83	0	2	163.1	65.8	24.7353	26	1	90	7	17.39	25.13	15	22.35	14	7	3	0	1	0	1	1	0	0	1	1
89	0	2						45	0			80		5	11		0	1	0	1	1	0	0	0
92	0	1				26		90	6	21	22.8	40		11	6	4	0	1	0	1	1	0	0	0	2
95	0	2	160.8	55	21.2711	18	1	80	3		15.5	70		10	17	3	1	1	0	0	0	1	0	0	7
87	0	4	164.3	69.8	25.8571	24	0	100	7	8.16	30	40	25	11	2	0	0	1	0	0	0	0	0	0	2
84	0	0	165	64	23.5078	20	2	100	3	15	18.4	15	15.2	14	7	2	1	1	0	1	1	0	0	0
86	0	3				20	4	65	1		10.6	65		9	1	5	0	0	0	0	0	1	0	0	4
83	0	4	161	61	23.533		0	85	6	25.25	31.1	40		13	9	2	0	1	0	0	0	0	0	0
82	0	5	157.5	58.5	23.5828	30	1	100	8		18.4	25		14	1		0	1	0	0	1	1	0	0
82	0	4	161	60	23.46	22	1	95	1	18	8	40		14	5	3	1	1	0	1	1	1	0	0	2
85	0	4	163	61.2	23.0344	26	1	45	1		21.03	75		14	5	3	0	0	1	0	1	0	1	0	0
90	0	5	158.1	70.4	28.1649	18	0	45	1		18.8	40		10	1		0	0	0	0	0	1	0	0
92	0	2	150	35	15.5556	10	0	25	0		9.1	25		7	4	5	0	1	0	0	0	0	0	0	2
91	0	2				15	3	65	0		18.8	65		12	6		0	0	1	1	0	1	1	0
87	0	2	157	62	25.1532	27	4	70	1		23.8	65		10	12		0	1	0	0	0	0	0	0
90	0	5	164	63	23.4236	19	1	85	2	10.54	27.9	30	19	12	9	3	0	1	0	1	1	1	0	0	4
84	0	1	165.8	72.3	26.3008	12	0	90	6	15	22.63	40		14	7	1	1	1	0	0	0	1	0	0	2
83	1	2	168	61	21.6128	28	2	100	8	12	28.3	30	25.3	13	5	2	0	1	1	0	0	1	0	1	1
70	0	5	167.1	59.2	21.2	29	0	100	7	10	30.9	15	30	13	3	0	0	1	0	1	0	0	0	1	2
88	0	1	155	50	20.8117	20	5	60	4		19.63	35		11	8		0	1	0	0	0	0	0	0
87	0	5	158.3	69.7	27.8145	25	0	95	5	18.76	31.3	25		13	5	1	0	0	0	0	0	0	0	0	1
81	0	1	154.1	59.8	25.1823	23	1	100	7	9.78	29	15	17	13	11	0	0	1	0	1	0	1	0	0	2
86	0	5	154.2	58.8	24.7291	20	0	100	3	9.37	27.1	40	35	13	3	2	0	1	1	0	1	1	0	0	3
86	0	5	168.3	69.9	24.6779	30	0	100	7	17	25.8	30	17	14	11	3	0	0	0	0	1	0	0	0	1
75	0	1	169	92.4	32.3518	28	0	90	7	18.76	29.47	25		14	10	2	1	1	1	1	1	0	1	0	2
92	1	4	172	63.8	21.5657	16	0	55	1			50		8	6		1	1	1	1	1	1	0	1
77	0	4	166	67	24.3141	28	0	100	8	10	34.6	15	25	14	5	0	0	1	1	1	1	0	0	0	6
68	0	5	168	70	24.8016	30	0	100	8	9.63	32.4	15	30.4	14	1	0	1	0	0	0	0	0	0	0	1
86	1	5	150	53	23.5556	28	1	95	4	11	14.6	15	13	14	3	4	1	1	0	0	0	0	0	0	2
80	0	4				8		15	2		7.1	35		7	9		1	1	0	0	1	0	0	0
78	0	4	155.1	63.4	26.3552	19	0	100	6	15.34	23.4	0	25	13	1	0	0	0	0	0	0	1	0	0	2
73	1	2	152	48	20.7756	20	0	100	8	12.41	18.2	15	23.6	12	7	2	1	1	0	1	1	0	0	0	2
74	1	2	166	53	19.2336	30	1	90	6	22.75	14	65	19	10	11	3	0	1	0	1	0	0	1	0	2
78	1	4	142.7	51.2	25.1433	26	1	90	5	21.62	16.6	25		14	6	3	0	0	0	1	0	1	0	0	2
94	1	2				12	1	55	0		8.1	50		8	6	4	0	1	1	0	0	0	0	0	3
75	1	4	150	65	28.8889	25	1	100	8	21.21	20.8	25	27	14	3	2	1	1	0	1	1	1	0	0
69	1	3	151.6	45.2	19.6671	27	2	90	7	12.84	16.9	15	25	12	10	2	0	1	0	1	1	0	0	0	4
79	1	0	157.8	54.1	21.7262	22	2	100	8	13.82	21.4	25	26	12	6	1	0	1	0	0	0	0	0	0	2
82	1	2	153	46	19.6506	15	0	100	5	12.75	11.4	158	22	11	10	2	1	1	0	0	0	1	0	0	5
77	1	2	152.6	67.3	28.9005	24	0	100	7	13.88	17.2	40	25.2	11	5	2	0	1	0	1	1	0	0	0	2
75	1	4	154	54	22.7694	26	0	95	8	8.5	20.8	15	26	14	0	1	1	1	0	0	0	0	0	0	1
70	1	5	149	57	25.6745	28	0	100	8			0		14	0		0	0	0	0	0	0	0	0
76	1	2	155.3	60.1	24.9191	29	0	100	8	16.21	13.5	15	21	14	4	2	1	0	0	0	0	0	0	0	3
73	1	4	145	58.4	27.7765	30	4	80	3	26.38	18.6	50		10	8	3	1	1	0	0	0	0	0	0	3
78	1	0	145	38	18.07	20	3	100	5	16	14.07	15		9	8	2	1	1	0	1	0	0	0	0	5
84	1	3	153.6	47.6	20.1755	16	1	65	1		8.6	65		12	10	3	0	1	0	0	0	1	0	0	3
75	1	3	166.1	60.7	22.0014	30	3	100	8	10.27	15	40	17.5	9	10	3	1	0	0	0	0	0	0	0	4
71	1	2	156.4	71.6	29.2711	23	5	95	6	14	11.47	15		14	11	1	1	1	0	1	0	0	0	0	3
83	1	2				20	2	50	1		8	25		11	7	3	1	1	0	0	0	0	0	0	2
76	1	2	149.1	69.6	31.3079	16	1	60	1		9.1	75		12	14	3	1	1	1	0	1	0	0	0	4
76	1	0	144.1	69.8	33.6146	20	0	95	6	13.8	14.8	15		14	12	1	1	1	0	1	0	0	0	0	3
91	1	3	999	999		18	3	20	0		0	60		6	0		0	0	0	1	0	0	0	0
73	1	3	155	54	22.47	28	3	100	8	14	15.76	40	29.33	13	8	1	1	0	0	0	0	0	0	0
69	1	1	151	50.9	22.3236	28	2	100	7	7	15.5	15	28	14	3	3	0	1	0	0	0	0	1	0	1
79	1	2	164	53	19.7055	26	1	100	8	10	17.4	15	28	12	3	2	0	1	0	1	1	1	0	0	3
76	1	5	161	74.9	28.8955	28	1	95	7	8.24	21.37	15		14	6	2	1	1	0	1	1	0	0	0	2
66	1	5	146.7	44.1	20.4917	27	0	100	7	12.6	18.7	15	24	12	7	0	0	0	1	1	0	0	0	0	3
70	1	5	157	60	24.3	27	0	100	8	6.7	20.9	0	30.8	14	3	0	1	1	0	0	0	0	0	0	1
85	1	5	151	60.9	26.7094	26	0	75	5		20.4	50		12	5		1	0	0	0	0	0	0	0
79	1	5	151	56.5	24.7796	30	3	90	4	11.07	13.1	15		12	14	3	0	1	0	0	0	0	0	0	2
92	0	4	165	60	22.0386	26	0	100	5		13.77	30		13	5		1	1	0	0	0	0	0	0
77	1	5	166.5	71.8	26	27	0	100	8	8.9	39.1	0	20.7	12	4	0	1	0	0	0	0	0	0	0	1
97	0	2	160	52.3	20.4297	23	1	80	0		17.7	40		12	4	4	0	1	0	1	1	0	0	0
66	0	4	174	70	23.1206	27	0	100	5	7	35	15	30	14	5	0	1	1	0	1	0	0	0	0	2
82	0	2	171.5	65	22.0996	30	0	100	6	11.53	28.3	15	21	13	11	0	0	1	0	1	1	0	0	0	1
81	0	3	162	65.8	25.0724	13		35	0		13.4	55		12	16		1	1	0	1	1	1	1	0
78	0	2	154	52	21.9261	29	1	85	2	12.3	14.2	55		13	8	3	1	1	0	1	1	0	1	0	7
68	0	5	164	62	23.0518	25	0	100	4	7	23	15	27	13	9	0	1	1	0	0	0	0	0	0	2
83	0	5	165	69.5	25.528	29	0	100	8	12.4	34.1	15	22	14	2	1	0	1	0	0	0	0	0	0	1
80	0	0	161	63	24.3046	9	1	60	1	19.59	16.9	40		14	8	4	1	0	1	0	1	0	0	0	3
77	0	0	163	65	24.4646	25	0	90	6	15.54	37.7	40		14	4	1	0	1	0	1	0	0	0	0	3
84	0	2	178	86	27.143	26	0	100	7	12.57	28.23	15	24.5	14	8	1	1	1	0	0	1	0	0	0	3
91	0	0	161.4	69	26.4876	14	0	85	5		19	30		14	6	2	1	1	0	0	0	1	0	1	3
71	0	5	166	79	28.6689	30	0	100	8	10.61	38.03	15	18.5	14	0	0	0	1	0	0	0	0	0	0	1
100	0	0						40	0		14.1	35		8	0	4	1	0	0	0	0	0	0	0	1
83	0	3				25	2	90	2	16.31	20	50	20	13	8	2	0	1	0	0	0	0	0	0	1
89	0	5	141	61	30.6826	19	1	50	1			65		12	6	5	0	1	1	0	1	1	0	0	5
90	0	2	157	69.7	28.277	14		90	0		13.1	65		12	11	4	0	0	0	0	0	0	0	1	1
83	0	3	153.5	62	26.3133	27	0	100	6	9.32	28.7	15	29.5	12	5	1	0	1	0	0	0	0	0	0	2
67	0	3	173	81.4	27.1977	28	0	100	8	11	34	15	21	14	7	0	1	1	0	0	0	0	0	0	3
86	0	2	151.5	57.3	24.9649	22	2	95	3		15.5	55		12	6	4	0	1	0	1	0	0	0	0	3
92	0	3	166	67.3	24.423	16	1	70	2	10.31	31.4	40		11	8	2	0	1	0	0	1	1	1	0	2
91	0	4	170	76	26.3	20	4	60	1		13.77	60		10	9		0	1	1	0	0	0	0	0
84	0	4	172	78	26.3656	27	2	100	4	9.37	25.4	25	29	11	8	4	0	1	0	1	1	0	0	0	0
82	0	2	155.9	66.3	27.2786	13	1	90	0		28.3	40		13	15	1	1	1	0	1	1	0	0	0	4
84	0	5	162	70	26.67	22	1	95	2		15.5	40		13	10	3	0	1	0	1	1	1	0	0
76	0	2	165.9	72.6	26.38	27	2	100	7	20.06	45.3	25		14	5	1	1	1	0	0	0	0	0	0	2
90	0	5	165	80	29.3848	29	0	85	7	24	21.47	25	17.83	14	4	2	0	0	0	0	1	0	0	0	1
89	0	3	170	70	24.2215	30	0	80	8	13.22	39	40	27	14	1	2	0	1	0	1	0	0	0	0	2
85	0	0	161	84	32.41	16	1	75	1	46	18.2	40		10	13	4	1	1	0	0	0	1	0	1	2
93	0	2	157.7	66.7	26.8202	7		65	0		15.5	80		9	14	5	1	1	0	1	0	0	1	0	3
88	0	2	156	56	23.31	17	1	70	2		11.5	60		13	11		1	1	0	1	1	0	0	1
66	0	3	169.7	77	26.7379	19	0	100	7	19	27.9	15		13	7		0	1	0	1	0	1	0	0
71	0	5	167.9	79	28.0237	30	1	100	8	11.72	46.1	15	29	14	0	0	0	1	0	0	0	0	0	0	2
87	0	5	163.9	56.2	20.9208	26	1	100	6	13.87	23.2	30		12	4	2	1	1	1	0	1	0	1	0	5
97	0	1				8		60	0			55		11	0	5	0	0	0	0	0	1	0	0	2
77	0	2	161.3	67.6	25.9823	20	0	100	8	11.77	30.4	15	32	14	7	0	1	1	0	0	0	0	0	0	3
69	0	4	157.6	57.6	23.1905	28	0	100	6	12.47	26.4	15	21	14	1	0	0	0	0	0	0	0	0	1	1
90	0	3	171	70.4	24.0758	26	0	100	6	9	30	30	17	14	7	1	1	1	0	1	0	0	0	1	2
84	0	3	153.1	55	23.4646	13	1	95	1	16.8	11.7	0	18.7	13	0	4	0	0	0	0	0	1	0	0	1
86	0	5	173.5	67.4	22.3904	24	1	85	3	29.49	31.1	65		13	5	2	1	1	0	0	0	0	0	1	8
75	0	5	165.4	73.6	26.9034	29	0	100	8	9.4	25.4	15	23	13	6	1	1	0	0	0	0	0	0	0	2
90	0	4	162	61	23.2434	26	0	75	1	32	14.8	30		14	6	4	1	1	0	1	0	0	0	0	2
92	0	5				29	1	95	4	22.34	22.7	40		10	5	3	0	1	1	0	1	0	0	0	3
86	0	4	172	86	29.0698	30	1	100	7	7	36.6	15	22.3	14	12	0	0	1	0	1	0	0	0	0	2
68	0	5	161.8	68	25.9748	29	0	100	7	12.09	46.2	15	35	14	5	0	0	1	1	0	1	0	0	0	3
68	0	5	170	70	24.2215	29	0	100	6	8.38	37.1	15	39.5	14	5	1	0	1	0	0	1	0	0	0	3
73	0	5	166	82	29.7576	27	0	100	7	13.05	32.9	15	25	14	2	0	0	0	0	0	0	0	0	0	0
96	0	2	174	75	24.7721	24	0	90	6	17.8	15.8	40		14	4	4	1	1	0	0	0	0	0	0	1
80	0	1	169.5	75	26.1049	28	2	100	7	12	19.8	15	13.6	14	13	3	1	1	0	0	0	0	0	0	2
92	0	1	165.5	56	20.4452	26	2	95	8	11.19	30.06	15	20	8	4	0	1	1	0	0	1	1	0	1	3
83	0	0	163	56	21.0772	18	2	95	4	13.2	27.8	15	12	13	6	4	1	1	1	0	0	1	0	0	3
86	0	1				13		15	0		15	55		8	0		1	0	0	0	0	1	0	0
92	0	4				25	1	90	2		26.1	40		14	6	3	0	0	0	1	0	0	0	0	2
65	0	2	159	58	22.9421	27	0	100	6	9.1	24.6	15	25	13	7	1	1	1	0	0	1	0	0	0	3
66	0	5	155.5	66	27.295	30	0	100	5	7.45	40.2	15	34	14	3	0	0	1	0	0	1	0	0	0	4
72	0	5	164	62	23.0518	24	1	95	5	23	22.93	15		14	7	0	0	0	0	1	0	1	0	0	5
73	0	5	171	85	29.0688	29	1	100	5	11	27.3	15		14	6	2	1	1	0	0	0	0	0	0	3
84	0	4	151	49	21.4903	30	0	100	6	16	24.2	15	13	13	8	4	0	1	0	1	0	0	0	0	1
93	0	3	154.1	66.3	27.9195	28	0	65	1		19.7	80		10	2	2	0	0	0	0	0	1	0	1	1
81	0	5	164	62.9	23.3864	25	0	95	8	15.05	31.7	25	19	14	7	3	0	0	0	0	0	0	0	0	2
80	0	5	162	82	31.2452	26	0	95	4	11	30.6	30		14	20	2	1	1	0	0	1	0	0	1	3
88	0	1	165	78	28.6501	14	4	70	0	31.04		40		13	17		1	1	0	0	1	1	0	1
89	0	2	165	57	20.9366	25	1	85	3		24.6	40		11	6	3	0	1	0	1	1	1	1	0	4
71	0	5	169.3	83.1	28.9926	27	1	100	6	10.18	43.4	15	27.9	12	5	0	0	1	0	1	0	0	0	0	3
90	0	3	158.4	42.3	16.8589	27	4	80	3		22.9	40		11	13	4	0	0	0	1	1	0	0	1
81	0	2	161.8	70.8	27.0443	28	0	95	5	12.32	25.5	15		14	6	2	1	1	0	1	0	0	0	0	2
89	0	2	167	66	23.6652	22	0	95	3	17	33.8	30		14	4	3	0	0	0	1	0	0	0	0	0
67	0	3				29	0	100	5	7.66	39	15	33	14	2	0	1	0	0	0	0	0	0	0	2
74	0	5	164.5	66.2	24.4639	28	2	80	5	22.25	29.5	50		12	9	4	1	1	1	1	1	0	0	0	7
77	0	4	168	59.6	21.1168	23	0	100	5	14.33	27	30		13	5	0	1	0	0	0	0	1	0	0	6
84	0	2	163.3	65.1	24.4123	29	1	95	8	17.82	28.4	15		14	7	1	1	1	0	1	1	0	1	0	4
89	0	5	167	70	25.0995	29	0	95	5	15.31	28.4	15		14	6	3	0	1	0	1	1	0	0	0	1
92	0	5	154	55	23.1911	28	1	85	3		14.7	50		50	10	4	0	1	1	1	0	0	0	0	3
70	0	5	165.1	58.8	21.5716	29	0	95	8	9.8	34.4	15	29	13	4	0	0	1	0	1	0	0	0	0	1
88	0	5	160	83	32.4219	23	3	85	7		30.7	40		14	8		1	1	0	1	1	0	0	0
86	0	5	164.4	64.5	23.8647	30	0	100	2	27	18.1	30	12.3	14	11	3	1	0	0	1	0	0	0	0	0
66	0	4	153.2	47.2	20.1106	24	0	100	7	10.44	28.5	15	28.3	10	8	1	0	1	0	0	0	0	0	0	1
73	0	5	168	78	27.6361	30	0	100	7	8.6	45.6	15		14	4	0	0	1	0	1	0	0	0	0	1
79	0	5	169.5	65	22.6242	22	2	80	1		11.6	80		9	10	4	1	1	0	0	0	0	0	0	2
87	0	4	165.5	52	20.27	16	1	85	3	15	24.5	40	5	9	7	1	1	1	0	1	0	1	0	1	2
88	0	4	158	48	19.2277	27	0	90	3	11.45	26	25		11	2	2	0	0	0	0	1	0	0	0	0
90	0	1	174	53	17.5056	7		75	1	20.09	10.4	15		13	7	3	0	1	0	0	0	1	0	0	2
89	0	5	161.2	58.8	22.6281		0	100	6	16.14	26	15		13	5	1	0	1	1	0	0	0	0	0	3
90	0	5	170	72	24.9135	25	0	100	4	18.7	25.8	25		14	5	3	1	1	0	0	1	0	0	1
70	0	4	168	78	27.6361	29	1	100	7	11.73	32.93	0	34.5	14	0	0	0	0	0	0	0	0	0	0	0
69	0	5	170	51	17.6471	27	2	100	7	5.52	36.7	0	34	7	0	1	0	0	0	0	0	0	0	0	0
91	0	2	167.2	50.6	18.1	22	0	90	6		29	15		11	6	1	0	0	0	0	0	1	0	1	3
68	0	5	163.6	53.5	19.9888	24	1	80	0		20	80		9	24	4	1	0	1	0	1	0	0	0	5
67	0	5	174.9	66.7	21.8045	25	1	95	6	8.01	34.2	60	24	13	3	0	0	1	0	0	0	0	0	0	0
76	0	2	161.2	40.5	15.5857	11		30	0		9.4	50		6	3	5	0	0	0	0	1	0	0	0	2
64	0	2	166.9	52.6	18.8831	26	1	95	5	22.94	27.97	40	20.17	11	7	2	0	0	0	0	0	0	0	0	0
86	0	5	168	65	23.03	26	0	100	5	8.23	30.4	15	19	13	9	1	1	1	0	0	0	0	0	0	3
84	0	3	163	72	27.0993	25	1	50	3		15.9	40		12	6	3	1	1	0	1	1	0	0	1	6
78	0	5	161	62	25.02	28	0	100	8	12	28.13	15	23.33	14	9	0	1	1	0	1	1	1	0	0	3
88	0	5	160	61.4	23.9844	23	5	60	1		11.4	50		9	13	3	1	1	0	0	1	0	0	0	2
67	0	4	178.1	76.7	24.1806	29	0	100	8	11.92	33.6	25	28	14	4	0	1	0	0	0	0	0	0	0	1
75	0	5	163.7	78	29.107	27	1	90	5	10.34	24.6	15	14	10	6	3	1	1	0	1	1	0	0	0	4
68	0	5	171.5	56	19.0397	30	3	75	4			40		12	9		1	0	0	0	0	0	0	0
65	0	4	171	70	23.939	30	0	100	7	8.28	32.63	15	23.83	14	15	0	0	1	0	0	0	0	0	1	3
71	0	5	159.6	67.3	26.421	29	5	100	6	15.6	17.3	40	30.1	12	5	3	0	1	0	0	0	0	0	0	1
75	0	5	152.4	48	20.6667	28	0	95	6	13.83	25.5	55		6	10	3	1	1	0	1	0	0	0	0	3
76	0	5	168	68	24.093	29	0	95	6	9.78	28.4	40	31	14	11	0	1	1	0	1	1	0	1	0	6
91	0	2				9		35	0		8	65		9	3	4	0	1	0	0	0	1	0	1	2
95	0	5	156	46.2		29	1	80	3		15	40		8	5	4	0	0	0	1	0	0	0	0	1
69	0	4	167.4	51.5	18.3779	30	0	100	6	7.39	31.4	15	37.3	9		0	0	0	0	0	0	1	0	0	1
91	0	4				10		95	2	13.26	22.6	40		14	8	4	1	1	0	0	0	0	0	0	1
89	0	5	156	60	24.6548	25	0	100	8	15	26.1	15	9.33	11	9	1	0	1	0	1	1	0	0	0	1
74	0	5	166	54	19.5965	29	0	100	7	15.53	24.3	65		10	7	2	1	1	0	0	0	0	0	0	3
92	0	5	164.1	45	16.7107	14	2	80	0		23.8	55		10	2		0	1	0	1	1	1	1	0
96	0	5				8	0	10	0			30		9	7		1	1	0	1	1	0	0	0
85	0	2	158.7	62.4	24.776	22	1	80	1	13.32	18.1	65	23	12	11	4	1	1	1	1	0	1	0	1	9
96	0	4	163.3	63.4	23.7748	21	0	65	1		29.6	55		9	6		0	1	0	0	0	0	0	1
89	1	4	170	90	31.1419	28	1	95	3	15.62	30.1	25	13	14	6	3	1	0	0	0	1	0	0	0	1
90	0	3	155	53.2	22.1436	25	4	90	4	33	26.6	65		11	5	2	0	1	0	0	1	0	0	0	1
78	0	0				6	3	20	0		0	105		9	7		1	0	0	1	0	0	0	1
75	0	5	155.6	68.1	28.1273	28	0	100	5	14.05	29.6	30		11	16	2	1	1	0	1	1	0	0	0	5
76	0	5	164	67	24.9108	28	0	95	8			15		14	3		1	0	0	0	0	0	0	0
77	0	5	169	54.5	19.082	24	3	75	3	11	23	65		11	11	4	0	0	0	0	1	1	1	0	2
90	0	3	153.9	60.5	25.5434	29	0	100	6	10.46	20.7	15	20	13	9	2	1	1	0	1	1	0	0	0	3
68	0	4	161	57.6	22.2214	28	0	90	8	14.12	18.4	30	22.5	13	17	2	1	1	0	1	0	0	0	0	3
74	0	5	167.5	62	22.0985	27	0	100	6	9.42	43.5	0	31.5	13	0	0	0	0	0	0	0	0	0	0	0
82	0	5	158.3	60.4	24.1032		0	100	7	9.42	30.1	15	26		2	0	0	1	0	0	0	1	0	0	1
77	0	5	154	53	22.3478	27	1	100	4	14	24.2	0	26.3	13	8	0	1	0	0	0	0	0	0	0	1
87	0	1				10		20	0		12.7	60		4	12		1	1	0	1	0	1	0	0
79	0	2	162.5	75.6	28.6296	19	2	100	5	13.57	33	15	16.5	14	6	2	1	1	0	1	1	0	0	0	4
88	0	1	162	70	26.6728	25	4	55	2		10.5	50		12	10	4	1	1	1	1	0	0	0	1	5
76	0	2	169.3	78.5	27.3877	26	0	100	6	11.69	36.6	15		14	3	1	0	1	0	0	0	0	0	0	2
74	0	3	163	60	22.5827	27	1	100	5	19.77	29.6	25		12	8	3	1	1	0	1	1	0	0	0	6
66	0	5	165	68	24.977	29	0	100	7	7	36	0	35	14	1	0	0	0	0	0	0	0	0	0	0
65	0	2	162	61	23.2434	28	0	100	6	13.75	28.3	15	24.4	14	9	1	0	1	0	0	1	0	0	0	3
78	0	4	150.7	76.9	33.861	27	3	100	8	16.44	28.9	55		14	6	2	1	1	0	0	0	0	0	0	2
91	0	0	159.7	64.2	25.1724	7	0	30	0		18.1	80		9	3		1	1	0	1	0	1	0	0
67	0	5	176.5	71	22.7913	29	2	100	7	8.44	47.2	15	40.5	12	4	0	0	1	0	0	1	0	0	0	1
77	0	5	160	62	24.2188	27	1	95	5	9	30.4	25	27	12	7	2	1	1	0	0	0	1	0	0	5
88	0	2	167.1	41.7	14.9342	29	3	100	7	12	28.46	15	17.66	11	4	1	0	1	0	0	1	0	0	1	2
91	0	5	163	51.5	19.3835	27	2	90	6	20		15		10	12		0	1	0	1	0	0	0	0
67	0	4	172.9	75	25.0883	30	0	100	6	8.47	46.3	15	23	14	6	0	1	1	0	0	0	0	0	0	2
67	0	4	171.1	57.4	19.607	29	0	100	5	9.72	36	15	29	12	3	0	1	0	0	1	1	0	0	0	3
99	0	2	999	999				10	0			105		5	0		1	0	0	0	0	0	0	0
83	0	2				10		20	0		19.6	75		10	11		0	1	0	1	1	1	1	0
91	0	1				28	1	95	3	20	23.8	35		14	8	4	0	1	0	1	0	0	1	0	1
77	0	2						100	7			55		14	1		0	1	0	0	0	0	0	0
87	0	1				13		40	0		14.6	40		12	4		0	0	0	0	0	0	1	0
69	0	4	165.9	68	24.7068	27	1	100	3		28.9	25		11	8	3	0	0	1	1	0	0	0	0	1
83	0	2	158	64	25.6369	27	1	100	6	12	18.8	15	16	14	7	2	1	1	0	0	1	0	0	0	3
76	0	2	158.8	53.2	21.0965	25	0	100	7	11.66	33	15	38	13	8	0	0	0	1	0	1	0	0	0	1
85	0	2				10	0	70	0	20.96	21.7	25	30	11	0	4	0	0	0	0	0	1	1	0	3
69	0	5	163	84	31.6158	27	3	100	8	10.16	30	15	25.9	14	9	1	1	1	0	0	1	0	0	1	3
90	0	4				26	2	80	2		31.5	40		11	11		1	1	1	0	0	0	0	0
91	0	4	162.7	61.6	23.2705	27	0	95	4	18.72	35.9	30	35.9	14	13	1	0	1	0	1	1	0	0	0	6
91	0	2	161.7	61.4	23.4827	26	2	85	2		24	40		12	0	4	0	0	0	0	0	0	0	1	2
68	0	4	155.6	50.7	20.9406	26	5	90	5	20.59	27.8	50		8	0	3	0	0	0	0	0	0	0	0	0
97	0	3	165	49	18	15	3	40	0			75		4	9		1	1	0	0	0	0	0	0
88	0	0						0	0			50		5	3	5	0	0	0	0	0	1	0	0	1
90	0	4	163	63	23.7118	20	1	90	5	17.73	22.9	15		14	2	2	0	0	0	0	0	1	0	0	1
70	0	5	171.8	85	28.7987	30	3	100	7	9.28	47.1	15	30	14	5	0	1	1	0	1	0	0	0	0	1
78	0	5	174.3	79.2	26.0694	28	0	100	8	11	31.7	15	31	14	7	0	0	1	0	1	0	0	0	0	2
75	0	5	150	55.4	24.6222	26	1	95	7	10.78	33.2	15	22	14	4	2	1	1	0	0	0	0	0	0	3
93	1	5	163.1	61.6	23.1565	27	0	90	6		38.5	30		14	8	0	0	1	0	1	1	0	0	0
83	0	2	172	61.3	20.7207	10	2	65	0			40		9	12		1	1	0	1	1	1	1	0
87	0	4	165	60	22.0386	25	0	75	0	15	16.7	40		11	4	4	0	1	0	0	0	1	0	0
70	0	4	176	82	26.4721	29	0	100	8	9.2	40.8	15	32	14	3	0	1	0	0	0	0	0	0	0
65	0	4	168	104.4	36.9898	29	1	100	5	12.4	35.37	0	13.83	13	10	2	0	0	0	0	0	0	0	0	2
70	0	4	159.2	72.3	28.5267	30	0	100	8	9.72	38.3	15	23	14	4	0	1	1	0	0	0	0	0	0	2
80	1	2	151.2	59.5	26.0264	26	0	90	8	22.45	21.7	25	14.5	14	4	2	1	1	0	0	0	0	0	0	3
85	0	4						50	0			80		10	0	5	0	0	0	0	0	1	0	0	1
89	0	5	153.7	52.6	22.2658	16	1	100	3	12.27	19.7	40		11		2	0	0	0	0	1	1	0	0	3
81	1	5	162	52	19.8141	29	4	100	4	22	19.5	15	13.5	8	20	5	0	1	0	0	0	0	0	0
84	0	2	157.1	63	25.5263	16	0	85	3	16.31	25.7	40	16	14	7	3	0	1	0	0	1	0	0	0	3
73	0	2	162	57	21.7193	29	0	100	8	6.78	38.2	15	45	12	6	0	1	1	0	0	0	0	0	0	4
78	0	0				21	2	100	2	18.69	21.7	50		13	6	4	0	1	0	0	0	1	0	0	2
93	0	2				10		15	0		10.5	50		4	0	5	0	1	0	1	0	1	0	0	2
82	0	2	163.4	71.1	26.6297	21	3	80	3		21.7	80		10	8	4	1	1	0	1	1	0	0	1	10
87	0	2	163.8	82.3	30.6741	16	2	65	0			75		13	7		1	0	1	0	0	1	0	1
68	0	2	162	72.7	27.7016	22	1	80	2		25.4	95		14	12	2	0	0	0	0	0	0	1	0	0
72	0	1	162	70	26.6728	29	1	100	8	13.52	32.7	0	21.7	12	0	0	0	0	0	0	0	0	0	0	0
84	0	4	171	71	24.281	28	1	95	6	10.03	27.1	15	37	14	7	2	1	1	0	0	0	0	0	0	3
91	0	2	166	80.65	29.2677	24	0	95	7	10	26.33	30		14	3	0	1	1	0	0	1	1	0	0	3
91	0	5	156.4	48.3	19.7457	15	2	5	0		10.2	40		3	7	4	0	0	0	0	0	0	0	0	2
85	0	3	170.7	71.3	24.4694	29	1	90	7		22.4	65		13	15	3	1	1	0	1	1	0	0	0	7
86	0	1				14	0	90	2	24	33.6	55		13	3	3	0	0	0	0	0	1	0	0	1
84	0	1	158.4	63.2	25.19	28	4	100	8	15.12	21.67	30	15.7	14	12	3	1	1	0	0	0	0	0	0	3
85	0	5				15	1	75	1		13.2	60		9	1		1	0	0	0	0	1	0	0
86	0	5	160	53	20.7031	24	0	100	5	30.1	32.2	0	30.1	12	3	0	0	1	0	0	0	0	0	0	1
75	1	2	162.5	74.6	28.2509	28	0	95	7	7	35.4	15	32	14	3	0	1	1	0	1	0	0	0	0	3
89	0	2	171	67	22.913	27	1	80	5	20.37	27.7	50		12	6	3	0	1	1	0	0	0	0	0	5
90	0	5	168	61.2	21.6837	14	5	65	1		16.6	75		9	7	4	0	1	0	0	0	0	1	0	1
89	0	4	160	60	23.4375	23	4	75	3		22.3	50		9	5	4	1	1	0	1	1	1	0	0	2
67	0	5	175	112	36.5714	29	1	100	8	12.51	41.9	15		14	5	1	1	1	0	1	1	0	0	0	4
75	0	2	168.5	59	20.7803	22	1	100	4	20.62	27.7	40		6	0	3	0	0	0	0	0	0	0	0	1
85	0	4	177	65.25	20.8273	15	2	100	4	17.09	32.47	15		13	0	4	1	1	0	0	0	1	0	0	2
65	0	4	164.7	76	28.0173	28	0	100	7	10.85	28.9	15	28	12	11	0	1	1	0	1	1	0	0	1	5
85	0	5	167	54.2	19.4342	30	4	80	6	15	32	65	20.33	10	6	3	0	1	0	0	0	0	0	0	1
67	0	3	167.8	67.7	24.0439	25	4	80	5		42	65		14	8	3	0	1	1	1	0	0	0	0	3
89	1	0	169.4	50.9	17.7374	18		90	6		25.8	55		6	7		0	1	0	0	0	1	0	0
94	0	5	178.8	75	23.4599	24	0	95	7	18.65	25.6	15		14	0	4	0	0	0	0	1	0	0	0	0
87	0	5	148	49	22.3703	23	2	100	4	23.33	19.2	15	15	13	9	4	0	1	1	0	1	0	0	0
71	0	5	166.2	69.7	25.2331	30	1	100	7	11.9	29.8	15	19.5	10	9	2	1	1	0	0	0	0	0	0	3
70	0	2	166.8	69	24.8003	20	0	100	3	10.23	38.23	15	25.5	14	9	0	1	1	0	0	0	0	0	0	3
82	0	0	160.7	61.5	23.8146	16		75	2		14.4	40		11	14	4	1	1	0	0	0	1	0	0	3
77	0	3						0	0			55		1	2		0	0	0	1	0	1	0	0
89	0	2	171.1	67.1	22.9204	5	2	85	1		12.6	65		10	3	4	0	0	0	0	0	1	0	0	1
90	0	5	159	61.7	24.4057	18	1	60	0		27.8	75		12	5	3	1	1	0	1	1	0	0	1	5
86	0	5				16		35	0			75		7	7		1	1	1	1	1	1	0	0
95	0	4	157.6	50.6	20.3722	17	1	75	0		16.6	40		12	7	3	0	1	0	0	0	1	0	0	2
89	0	2	157.6	65.1	26.2101	28	2	95	7	21.36	13.3	50		14	6	4	0	1	0	0	0	1	0	1	3
83	0	2	170	79.1	27.3702	13	1	65	1		22.9	75		14	5	4	0	0	0	0	1	1	0	0	3
80	0	2	164	52.4	19.4825	15	4	95	5	18.68	22.07	25		6	8	5	0	1	1	1	0	1	0	1	5
89	0	0	165.2	54.6	20.0066	12	3	90	2	34.18	27	40		8	2	4	1	0	0	0	1	1	0	0	2
87	0	3	157	52	21.0962		1	100	6	12.76	18.2	15	19.5	12	6	2	0	1	1	0	0	0	0	0	2
76	0	2	165	70.5	25.8953	29	2	95	7	21	26.1	40	19.3	13	6	3	1	1	1	0	1	0	0	1	2
65	0	2	156	54	22.1893	30	3	100	5	8.08	28.1	15	23	9	0	3	1	0	0	0	0	0	0	0	5
86	0	2	178	68.2	21.5251	14	0	55	1	21.61	20.9	40		13	6	5	1	1	0	0	0	0	0	1	3
70	0	2	170	82	28.3737	29	0	100	7	9.7	37.4	15	30	14	5	0	1	1	0	1	0	0	0	0	2
84	0	2	159	62.4	24.6826	26	1	90	3	17.02	17.5	40		14	9	3	1	0	0	0	1	0	0	0	4
92	0	3	162.5	57.3	21.6994	18	1	40	0		17.1	75		10		4	1	1	0	1	0	1	1	0	5
90	0	2	170	84	29.0657	29	1	85	1	29.8	24.6	40		12	15	4	1	1	0	1	0	0	0	1	3
81	0	3	158.3	58.6	23.38	28	0	100	1	8	14.83	15		14	11	0	1	1	0	1	1	0	0	0	3
80	0	1	158.8	71.6	28.393	23	1	100	8	10.24	26.1	15	18	14	7	2	0	0	0	0	1	1	1	0	1
66	0	5	179.2	68.5	21.3312	27	0	100	7	8.25	36	15	28.8	13	5	0	0	0	0	0	0	0	0	0	0
65	0	3	167	78	27.968	27	1	100	5	8.62	46.77	15	32	14	3	0	0	0	0	0	0	0	0	0	2
66	0	2	167.3	67.2	24.0092	29	2	100	3	13.85	25.2	55	26.5	10	20	4	1	1	0	1	1	1	1	0	8
72	0	4	169	61	21.3578	29	0	100	5	8.19	33	15	30.8	13	8	1	1	1	0	1	0	0	0	0	1
75	0	2	153	51.2	21.8719	26	4	55	1		13.5	40		11	13	5	1	1	0	0	0	0	0	0	4
84	0	2	167	85	30.478	19	1	65	2		26.1	35			10		0	1	0	0	1	1	0	1
88	0	5	172.2	84.1	28.3615	30	0	90	3	16.42	28.9	40		13	13	2	1	1	0	0	1	0	0	0	6
82	0	2				29	0	90	7		22.6	55	22.6	7	3	4	1	0	0	0	0	0	0	0	2
90	0	5	156.8	65.5	26.6409		1	95	5	17.89	22.8	30		12	7	1	0	1	0	0	0	0	0	0	2
80	0	0	155.3	50.7	21.0216	22	2	100	4	15.47	11.3	65		13	0	4	0	0	0	0	0	0	0	0	0
90	0	3	153	52	22.07	27	4	95	6	20	24.96	40		12	6		0	1	1	1	1	0	0	1
88	0	3	159.3	50.7	19.9791	14	1	30	1	35	7.17	65		2	0	5	1	1	0	1	1	1	0	1	12
85	0	5	164	60	22.3081	23	1	80	5	30.33	14.8	90		12			1	1	0	0	0	0	0	0
86	0	4	160.5	61	23.6799	30	0	95	6	8.62	20	15	25	14	7	1	1	0	0	0	1	0	0	0	1
67	0	5	178	67	21.1463	28	0	100	8	7	44.9	0	36	13	1	0	0	0	0	0	0	0	0	0
85	0	2						50	0			90			4		1	0	0	0	0	1	0	0
89	0	5	171	78.3	26.7775	28	0	100	5	15.71	24.7	50	21	14	12	1	1	1	0	1	1	0	0	0	2
93	0	2	150	38	16.8889	24	0	100	8		10.7	15		11	3	2	0	0	0	0	1	0	0	0	3
70	0	4	165	69	25.3444	29	0	100	8	8.72	37.4	15	29	14	11	0	0	1	0	1	1	0	0	0	4
85	0	2	158.6	55.8	22.1834	21	3	95	4	19.07	20.03	40		11	8	4	1	0	0	0	0	1	1	0	1
78	1	5	159.5	70.7	27.7906	15	1	100	2	19.22	22.2	40		13	6	4	0	0	1	0	1	1	0	0	1
73	0	2	160	71.9	28.0859	27	0	100	6	1	15.9	15		14	7	2	1	1	0	0	1	0	0	0	2
72	0	3	173	70	23.3887	26	0	100	5	11.12	43.8	15	15	13	8	0	1	1	0	0	1	0	0	0	7
89	0	5	161.3	72	27.6735	26	0	100	8	15.7	31.6	25	20	14	7	2	0	1	0	1	1	0	0	0	4
91	0	5	157	46	18.662	20	1	85	2		28.9	40		10	4	3	0	1	0	1	0	0	0	0	2
65	0	4	164.6	72.1	26.6119	23	0	80	6		28.6	15		14	8	2	0	1	0	1	0	0	0	0	1
81	0	5	167.8	84.2	29.9039	21	1	95	2	12.02	27.7	15		14	9	2	1	1	0	1	1	1	1	1	3
66	0	5	177.7	74.3	23.5296	26	0	100	6	11.56	40.8	15	41.8	14	7	0	1	0	0	1	1	0	0	0	1
78	0	5	178	85	26.8274	29	0	100	5			40		14	6		1	0	0	0	1	0	0	0
81	0	5	165	58.7	21.5611	30	0	100	5	17	23.2	0	14	13	3	3	1	0	0	0	0	0	0	0	0
71	1	5	151	51.5	22.5867	24	0	100	8	13.56	17.63	0		13	0	3	0	0	0	0	0	0	0	0	0
69	1	4	156	53.9	22.1483	29	4	95	7			0		13	0	0	0	0	0	0	0	0	0	0	1
84	1	4	157	55.6	22.5567	30	0	100	4	16.86	20.2	30		13	6	2	1	1	0	0	0	0	0	0	2
80	1	0	146.6	48	22.3343	17	1	95	7	15.72	16.9	30	19.8	12		4	0	1	0	0	0	1	0	0	3
82	1	2	141	37	18.6107	13	2	95	3	26	8.5	50		9	6	4	0	1	0	0	1	1	0	1	2
73	1	2	156.7	55.3	22.521	29	0	100	8	7.23		15		13	6	0	0	0	0	0	0	0	0	0	0
81	1	3	157.6	60.9	24.5191	30	0	100	8	25.73	18.2	30		14	9	1	0	1	0	1	0	0	0	0	3
86	1	4		51				0	0			15		6	11	4	0	0	0	0	1	0	0	0	3
79	1	0	146.8	74.6	34.6168	27	2	80	2	26.03	15.6	35		13	10	4	1	1	0	0	1	0	0	0	3
79	1	2	161.7	68.7	26.2746	10	0	100	1	13.7	21.6	50		12	7	3	1	1	0	1	0	1	0	0	5
90	1	0	146.7	45.2	21.0028	22	0	90	5		13.67	25		11	4		1	1	0	1	0	0	0	0
71	1	2	143.2	42.6	20.7742	22	0	100	5	8.9	23.5	15		12	6	0	1	1	0	1	0	1	0	0	3
65	1	4	154.8	52.2	21.7835	26	1	95	8	10.5	18.1	15	22	13	4	0	1	1	0	0	0	0	0	0	3
65	1	5	153.2	73	31.1032	30	0	100	8	9.43	21.3	15	31	14	4	0	1	0	0	0	0	0	0	0	2
73	1	0	148.9	59.1	26.6562	19	0	95	6	19.21	17.6	15	19.5	14	4	1	0	1	0	0	0	0	0	0	1
80	1	2	153	52	22.2137	28	0	100	8	10.21	17.6	15	23.3	13	6	1	0	0	0	0	1	0	0	0	4
68	1	3	151.2	65.3	28.5634	30	0	90	8	18.7	15.4	25		14	6	2	1	1	0	1	0	0	0	0	2
66	1	4	145.6	50.1	23.6328	27	0	95	8	8	17.13	15	10.66	14	3	0	0	1	0	0	0	1	0	0	2
68	1	2	157.3	61.7	24.9361	26	1	100	7	10.16	18.9	15	18.8	14	6	0	1	1	0	0	0	0	0	0	3
75	1	5				7	4	20	0	41.14	0	65		7	4	5	1	0	0	0	0	1	0	0	2
77	1	0	151.8	53.6	23.2606	8		90	1	16.89	11.1	40	12	13	2	4	1	1	0	1	1	1	0	1	2
68	1	5	168	68	24.093	28	3	100	6	14.72	20.2	25	17.5	13	4	3	1	0	0	0	0	0	1	0	2
79	1	2	163	53.5	20.1362	21	0	95	8	11	22.2	15	16.5	11	0	1	0	1	0	0	0	1	0	0	3
88	1	4	149	54.3	24.4584	28	0	80	5	37.95	8.8	65	17	14	5	4	0	1	0	1	0	0	1	0	1
81	1	0	157.9	72.2	28.9583	20	0	90	7		19.9	15		14	10	3	1	1	1	1	1	0	0	0	6
77	1	3	145	47	22.3543	30	0	100	8	10.2	19	15	31	13	2	0	1	1	0	0	0	0	0	0	2
68	1	3	150.9	46.7	20.5087	23	2	100	8	12.78	20.3	15	27	12	9	1	0	0	0	0	0	1	0	0	2
85	1	3	144.9	45.4	21.6232	21	0	100	7	17.72	9.8	40		11		3	1	1	0	0	1	0	0	0	2
81	1	2	155.3	50.4	20.8972	29	2	100	1	15.25	25.6	25		8	3	2	1	1	0	1	0	0	0	0	3
91	1	0	151.2	43.9	19.2026	17	1	85	4		6.9	40		12	3	4	0	1	0	0	0	0	0	0	2
72	1	4	152.1	51.5	22.2612	28	1	100	8	9.56	21	15	34	11	7	1	0	1	0	1	0	0	0	0	1
80	1	0				18	0	100	6	15.6	16.33	30	15.17	11		3	1	1	0	0	0	0	1	0	2
84	0	0	147.2	47.3	21.8296	17	2	50	1	27.27	11.6	35		6	0	5	1	0	0	1	0	1	0	1	1
69	1	3	145	53	25.2081	27	2	100	8	10	14.5	30	15	13	8	4	0	1	0	0	0	0	0	0	1
90	1	0				15	1	75	1		5.9	65		11	6	3	0	1	1	1	1	1	0	0	3
80	1	4	155.9	66.5	27.3608	26	0	95	8	10.02	16.3	10	28.5	14	1	2	0	0	0	0	0	1	0	0	1
72	1	0	149.8	45.6	20.3208	19	4	100	2		17.4	55		8	10		1	0	0	1	1	0	0	0
71	1	5	153.4	63	26.7726	30	0	100	8	7.85	29	15	28.5	14	9	1	1	1	0	1	1	0	0	0	3
70	1	3	150	78	34.6667	24	0	100	7	11.61	24.96	15	20.5	14	6	0	1	1	0	0	0	0	0	0	3
73	1	1	147	53.7	24.8508	15	3	90	5	14.2	15.8	30		14	3	2	1	1	0	1	0	0	0	0	3
87	1	5	139.7	52.8	27.0546	21	3	85	3	20.4	11	80	25	12	3	4	0	1	0	1	0	1	0	0	0
65	1	2	152	59	25.5367	28	1	100	8	9.57	15	0	16	9	1	4	0	0	0	0	0	0	0	0
83	1	3	155	54	22.4766	25	3	55	2		8.6	60		6	11	5	1	1	0	0	1	0	0	1	8
72	1	5	151	54	23.6832	5		30	0		7.4	65		10	10	4	1	1	1	0	1	0	0	0	7
65	1	5	152	54	23.3726	30	0	100	8	19		0		14	1		0	1	0	0	1	0	0	0
74	1	2	158	57	22.8329	26	0	100	8	7.82	20.9	0	17.6	13	1	0	1	0	0	0	0	0	0	0	1
70	1	3	157.6	45.5	18.3189	27	3	100	8	13	9.4	15	17	11	3	4	0	0	0	1	0	0	0	0
75	1	5	155	60	24.974	29	0	100	8	6.7	15.9	15		14	2	2	1	1	0	0	0	0	0	0	3
90	1	3		41		13		55	1			80		6	0		0	0	0	0	0	0	0	0
78	1	4	152	56.7	24.5412	30	0	95	8	10.72	18.8	15	29	14	6	0	1	1	0	0	0	0	0	0	4
78	1	2	159.6	62.5	24.5366	22	3	95	6	11.6	17.2	30	17.2	13	5	4	0	0	0	0	0	1	0	0	2
74	1	2	145.3	43.5	20.6043	14	2	100	6	16.54	12	25	18.5	11	0	4	0	0	0	0	0	1	0	0	2
89	1	2	146.3	48.5	22.6596	15	1	70	0		10.4	40		11	6	4	1	1	0	1	1	0	0	0	4
78	1	0	150.5	49.6	21.8982	13	1	90	4	10.82	16.9	15		13	11	2	1	1	0	0	1	1	0	1	5
88	1	3	148	56	25.5661	21	4	90	3	26.54	7.9	40	13	14	15	4	1	1	0	0	1	0	0	0	3
81	1	0	140.3	58	29.4654	17	1	50	1		6	90		11	7	4	0	1	0	1	0	0	0	0	2
73	1	5	145	47.8	22.7348	20	0	100	6	11.7	12.8	15	25.5	13	7	3	1	1	0	0	0	1	0	0	2
85	1	2				10	2	65	2			25		11	6		0	0	0	0	0	1	0	0
69	1	5	151.1	54.9	24.046	30	0	100	8	9.19	27	15	28	14	1	0	1	0	0	0	0	0	0	0	1
81	1	0	151	46	20.1746	16	0	65	1	20.16	14.8	50	21	9	7	5	1	1	0	0	0	0	0	0	5
74	1	4				29	2	80	7	21	12.6	25		14	1	4	0	0	0	0	0	0	0	0	0
76	1	5	156	50.1	20.5868	30	1	100	7		15.6	40		11	2		1	1	0	0	0	0	0	0
81	1	0	148	67.5	30.8163	27	1	65	2			40		14	2		1	0	0	0	0	0	0	0
76	1	3	154.1	62.2	26.19	29	1	100	8	10.47	19.8	15	30	13	8	0	1	1	0	0	0	0	0	0	2
80	1	3	154.2	56.3	23.6777	29	0	100	8	7.39	20.8	15	28	14	11	0	1	1	0	1	0	0	0	0	3
78	1	3	149.4	31.3	14.0231	22	5	85	4	17.85	14.3	15	18.8	6	4	5	1	1	0	1	0	0	0	0	2
67	1	4	163	35.5	13.3614	28	1	100	8			0		11	0	2	0	0	0	0	0	0	0	0	0
68	1	4	155.9	55.3	22.7527	29	0	100	8	7.06	23.4	15	36	14	3	0	0	1	0	0	0	0	0	0	2
66	1	5	168.3	83.4	29.4441	29	0	100	8	11.27	12.1	40	34	14	7	2	1	0	0	0	0	0	0	0	2
68	1	2	153	52	22.2137	24	3	95	8	13.58	22.2	15		13	10	3	1	1	0	0	1	0	0	0	2
70	1	4	166.8	73.3	26.3458	30	0	95	6	9.3	19.2	15		14	0	0	0	0	0	0	1	0	0	0	0
83	1	4	147.8	53	24.262	16	0	95	3	24.65	12.2	55		13	7	3	0	1	0	1	0	1	0	0	2
77	1	2	156.2	55	22.5424	27	1	95	8	17.25	9.1	25	22	13		4	1	0	0	0	0	0	0	0	2
79	1	2	147	60.1	27.8125	27	0	100	7	12	19.9	15		14	5	0	0	1	0	0	1	0	0	0	2
83	1	2				14	1	25	0		7	15		11	5	5	0	1	0	0	1	1	0	0	2
89	1	3				11	0	55	1		7.8	40		14	9		1	0	0	1	0	1	1	1
85	1	2	152	50.5	21.8577	19	0	85	2	34.05	20.3	30	16.83	11	3	0	1	1	0	0	0	0	0	0	2
67	1	4	157	62	25.1532	29	3	100	6	12.06	23.2	15	21.5	12	2	3	1	1	0	0	1	0	1	0	2
68	1	5	166.4	59.2	21.3804	29	1	100	8	12.81	20	15	43	13	0	0	0	0	0	0	0	0	0	0	1
65	1	2	163.7	73.9	27.577	27	1	100	8	8.07	26.4	15	30.5	14	3	0	1	1	0	0	0	0	0	0	2
65	1	5	155	58	24.1415	26	2	95	6	13.44	11.7	15	17.7	10		4	0	0	0	0	0	0	0	0	0
75	0	2	155.4	49.9	20.6632	19	0	100	8	10.9	21	15	17.5	12	8	1	1	1	0	0	1	0	0	0	0
75	1	3	145	40	19.025	25	0	100	4	15	11.7	15		12	16	5	1	0	0	1	0	0	0	1	3
82	1	0	145.6	56.4	26.6046	11	2	55	0		5.4	50		14	5	4	1	1	0	0	1	1	0	0	6
89	1	4	151.5	51	22.22		0	100	5	14.23	13.5	40		13	5	3	0	0	0	0	1	1	0	0	4
79	1	2	153	50	21.3593	22	1	100	8	17.18	14.1	25	23.2	13	6	3	0	1	0	1	0	0	0	0	4
89	1	1	139.8	46.4	23.7413	20	1	95	6	15.13	15.8	55		13	6	2	0	1	0	1	0	0	0	0	1
76	1	3	151	61	26.7532	23	0	100	8			15		14	5		1	1	0	0	0	0	0	0
74	1	2	160	56	21.875	25	1	100	8	19.92	19.4	15	21.5	13	2	3	1	0	0	0	0	1	0	0	2
86	1	2		40.8		16	2	5	1		8.7	15		2	0	5	0	0	0	0	0	1	0	0	1
78	1	5	166.4	76.9	27.7728	30	0	100	8	9.7	25.5	15	30	14	6	0	1	1	0	1	1	0	0	0	5
75	1	5	165	58.5	21.4876	30	0	100	8	8.76	25.4	15	33	13	5	0	0	0	0	1	0	0	0	0	1
77	1	5				25	2	95	4	16.68	18.7	50	34.5	12	5	3	1	1	0	0	1	1	0	0	4
81	1	2	150	52	23.1111	26	1	100	8	10.8	14.4	15	24	14	8	2	1	1	0	1	1	0	0	0	4
77	1	3	149.9	51.8	23.0529	14		45	0		14	75		10	15	4	1	0	0	0	0	1	0	0	2
88	1	4	141	48	24.1437	18	1	60	4	52		40		12	5		1	1	1	0	1	1	0	0
88	1	4	158	70	28.0404	22	4	55	1		9.9	50		12	14		0	0	0	1	0	1	0	0
69	1	5	162	60	22.8624	29	4	100	7	7.07	18.6	15		13	3	2	0	1	0	0	0	0	0	0	2
88	1	5				13	4	55	0	66.66	7.9	80		3	3		0	1	0	0	0	0	0	0
81	1	4	153	75	32.04	30	0	90	6	14.23	17	25	16.5	14	5	4	0	1	0	0	0	0	0	0	2
83	1	5	155.6	49.9	20.6102	28	0	95	8	7.7	21	15	32	12	6	0	0	1	0	0	1	0	0	0	2
73	1	3	151.1	45.9	20.1	28	0	95	8	15	20.27	15	51.67	12	4	1	1	1	0	0	0	0	0	0	2
75	1	2	154	57.8	24.37	26	0	90	8	16	12.07	15		14	0	2	0	0	0	0	1	0	0	0	0
85	1	0	154	61.6	25.974	18	1	90	1		10.1	65		14	6	4	0	1	0	0	1	0	0	0	5
67	1	2	156.3	61.8	25.2971	28	0	100	8	9.45	29.1	15	30	14	1	0	0	1	0	0	0	0	0	0
86	1	2	147.3	39	17.9746	20	1	95	4		9.3	55		9	3		0	0	0	1	0	1	0	0
88	1	2	155	45	18.7305	23	1	85	4	22	11.57	65	16.33	11	5	1	0	1	0	0	0	0	0	0	1
67	1	4	153.5	47	19.9472	28	0	100	8	10.24	18.2	15	28.4	12	0	2	0	0	0	0	0	0	0	0	2
70	1	5	151	63.8	27.9812	30	4	90	2	13.67	12.2	25	26.2	10	7	4	1	1	0	1	1	0	0	0	4
73	1	0	152	71	30.7306	25	2	90	5	15.93	18.8	15		14	11	2	1	1	0	1	1	0	0	0
70	1	2	139.1	48.4	25.0145	24	0	100	8	13	11.33	15	14	14	4	0	1	1	0	0	0	0	0	1	2
76	1	2	150.2	55.4	24.5567	14	3	90	3		14.2	65		12	1	4	0	1	0	1	0	0	0	0	2
79	1	5	153.9	59.3	25.0367	23	0	100	8	15.85	15.5	40	25	14	3	2	0	1	0	0	0	0	0	0	1
70	1	5	152	50	21.6413	28	0	100	8	8.2	20	15	31	11	5	0	0	0	0	1	0	0	0	0	1
83	1	2	143	60.3	29.488	19	1	95	3	11.8	11.8	25		12	7		0	1	0	1	1	0	0	1
67	1	5	161.7	64.9	24.8213	30	1	100	7	11.93	28.7	15	21.5	14	11	1	1	1	0	0	1	0	0	0
65	1	3	160.1	75.3	29.3773	28	1	100	8	8.32	32.9	15	25.5	14	2	0	1	1	0	0	0	0	0	0	2
65	1	2	150	64.2	28.5333	28	1	100	7	10.01	17.9	15		14	5	2	0	1	0	0	0	0	0	0	2
69	1	3	153.4	43	18.2733	28	0	100	8	10.45	17.9	15	30.5	10	4	2	1	1	0	0	0	0	0	0	3
92	1	1				15	0	90	3		12.2	40		7	1	3	0	1	0	0	1	1	0	0	1
70	1	3	154.4	60.1	25.2104	15	1	100	5	16.4	13.7	25	17	14	14	3	1	1	0	1	1	0	0	0	4
88	1	0	147	54	24.9896	7		40	0			55		11	8		1	0	0	1	0	1	0	0
80	1	0				18	2	85	0	20.57	13.2	25		13	2	4	1	1	0	0	0	1	1	1	2
72	1	3	150.4	50.6	22.3694	26	1	100	8	14.72	11.8	15		12	9	3	1	1	0	0	1	0	0	0	4
73	1	2	161.4	69	26.4876	28	0	100	8	9.81	21.9	15		14	11	0	1	1	0	0	0	0	0	0	3
85	1	0	149.5	44	19.6866	19	1	85	4	22.59	8.1	50		10	11	5	1	0	0	1	1	0	0	0	2
86	1	2	150	53	23.5556	13		100	4		16.3	40		14	6	3	0	1	0	1	1	1	0	0	6
83	1	0	159.9	78	30.5069	15	1	80	1		23.6	40		13	13	2	1	1	0	1	1	1	0	1	4
81	1	2				27	2	95	8	23	16.6	40	12	10	1	4	1	0	0	0	1	0	0	0
78	1	2	141.7	57.6	28.6868	14	1	35	0		11.2	15		11	6	5	1	1	0	0	0	0	0	1	2
72	1	3	155.7	58.1	23.9662	29	0	100	8	11.05	23.1	15	30.7	14	4	0	1	0	0	1	0	0	0	0	2
87	1	2	153.2	64.3	27.3964	30	1	90	6	18.22	10.7	40		14	8	4	1	1	1	1	1	0	0	0	6
85	1	2	148.8	57.5	25.9694	17	4	95	8	24.02	11.1	40		11	5	4	1	1	0	1	1	1	0	0	5
78	1	3	140.5	52	26.3421	21	0	95	3			15		14	4		1	1	0	0	1	1	0	0
70	1	4	164	65.4	24.3159	28	0	100	8	10.14	25.1	15	34	13	3	0	0	0	0	0	1	0	0	0	1
86	1	0	148	55.7	25.4291	19	0	90	6	17.34	9.2	40		14	4	3	1	1	0	0	1	0	0	0	2
78	1	0	150	76	33.7778	17	1	75	5	29.58	15.03	75		14	7	5	1	1	0	0	0	0	0	0	2
84	1	2	156.1	64.4	26.429	16	3	85	4	19.32	16.5	15		14	1	3	1	1	0	0	1	0	1	0	2
92	1	2	150	41.8	18.58	22		75	0		10.53	65		10	5		0	1	0	0	0	1	0	0
78	1	4	155.6	77.2	31.8859	24	1	70	3		21.5	40		11	6		1	1	0	1	0	0	0	0
84	1	0	147	65.5	30.3114	10	2	45	0		9.5	90		11	0	3	0	0	0	0	0	1	0	0	1
81	1	2	143.7	57.3	27.7486	16	0	100	4	16.7	17.3	15	21.6	13	3	3	0	0	0	0	0	1	0	0	1
83	1	2				30	0	90	7	14.48	18.2	30		13	8		0	1	0	1	0	0	0	1
77	1	0	157.1	56.6	22.9332	18	3	100	7	13.99	21	40	23	13	6		0	1	0	0	0	1	0	0
71	1	2				23	1	35	1		12.83	75		11	10		1	1	0	0	1	1	1	0
88	1	0	151	48.2	21.1394	20	0	65	1	20.25	10.6	40		9	9	4	0	1	0	0	1	0	0	0	4
80	1	0	152	63	27.268	20	0	95	4	20		55		14	2		1	1	0	0	0	0	0	0
87	1	0				8		20	0		7.07	30		7	9		1	0	0	0	0	1	0	0
83	1	2	159.3	65	25.6143	23	2	90	5	25.54	15.8	40		10		2	0	0	0	0	0	1	0	0	1
84	1	5	158	77.5	31.0447	20	2	80	1		11.5	40		11	9	4	1	0	0	1	1	1	0	0	3
90	1	3				16	1	60	0		9.5	50		5	6	5	1	1	0	1	0	0	0	0	3
79	1	2	146	56	26.2713	24	1	95	6	12.7	21.5	25	29	12	6	3	1	1	0	0	1	0	0	0	5
88	1	1	151.2	75.8	33.1563	20	1	85	4	17.22	15.7	40	16.6	14	13	4	1	1	0	1	1	0	0	0	5
89	1	2	146	52.9	24.817	20	1	70	2		11.2	75		11	9	4	0	1	0	1	0	0	0	1	4
78	1	0	153	58	24.7768	19	2	100	8	10.46	17.6	15		14	6	4	1	1	0	0	1	0	0	0	2
72	1	3	152.6	66.8	28.6858	23	2	90	3	23.28	15.2	40		11	7	4	1	0	0	0	1	1	0	0	6
84	1	0	155.2	46.8	19.4295	16	0	100	5	13.25	15.6	15	27	11	4	1	0	1	0	0	0	0	0	0	1
82	1	2	153	55.6	23.7515	27	0	95	4	15.9	20.7	30	24.5	14	8	0	1	1	0	0	0	0	0	0	2
86	1	0	150	60	26.6667	20	1	90	8	21.96	19.03	55		13	9	3	1	1	1	0	1	0	0	0	3
65	0	2	160.5	73.9	28.69	24	2	100	8	12	15.23	15	10	14	5	1	1	1	0	0	0	0	0	0	3
86	1	2	139	56	28.984	24	4	80	1	61	13.13	40		14	9	4	1	1	0	1	0	0	0	0	3
84	1	0	150.7	50	22.0163	15	2	90	3	20.61	22	65		11	6	3	1	0	0	1	0	1	0	0	4
88	1	0	149.8	51.7	23.0392	12	1	80	1		14.6	65		14	11	2	0	0	0	1	1	1	0	0	5
75	1	2	143.6	71.7	34.7704	17	1	85	2	19	12.73	50		14	5	3	1	0	0	1	1	1	0	0	4
76	1	0		62		23	2	100	8	13.29	15.27	40	11.33	8	7	4	1	1	0	1	1	0	0	0	2
70	1	0	145	70	33.2937	16	1	80	1		14.73	25		14	8		0	0	0	1	0	1	0	0
71	1	2	158.3	70.5	28.1337	21	3	85	7		20.3	65		10	8	4	1	1	0	0	0	0	1	0	3
80	1	0	149.4	38.8	17.3832	11	1	30	1		10.7	40		10	4	2	1	1	0	0	0	0	0	0	3
83	1	2			22	17	3	75	2	25.66	9	55		9		4	0	1	0	0	0	1	0	0	2
85	1	2	154.8	48	20.0308	18	4	90	4	19.16	15	40	24	7	8	5	0	0	0	0	0	1	1	0	3
84	1	3	150.9	46.7	20.5087	22		75	0		9.6	25		11	7	4	0	1	0	1	0	1	0	0	3
65	1	2	152.3	75.9	32.7222	24	2	100	8	10.43	21.2	15	28.5	14	4	0	1	0	0	0	0	0	0	0	3
72	1	1	156	56	23.0112	25	0	100	7	9.4	21.2	30	15	14	6	1	1	1	1	0	0	0	0	0	4
69	1	2	153.3	56	23.8289	27	0	95	8	6.42	24	15	23	14	2	0	1	1	0	0	0	0	0	0	9
77	1	0	162	54	20.5761	20	1	100	7	9	15.1	15		12	6	3	1	1	0	0	0	0	0	0	3
84	1	0	158.4	65.6	26.1453	15	2	75	3		11.8	65		14		5	1	0	0	1	0	0	0	1	3
75	1	0	154.8	62.6	26.12	20	2	65	3	35	15.1	35		10	6	4	0	0	0	1	0	1	0	0	5
83	1	2	136.5	36.4	19.536	23	1	80	5			50		12	14	3	0	0	0	1	1	1	0	0	4
79	0	0	154.8	76.6	31.9659	13	1	100	4	15.9	20.1	25		14	8	1	1	1	0	0	0	0	0	0	3
84	1	2				21						15			6		0	1	0	1	1	0	0	0
72	1	0	164	64.3	23.9069	19	3	100	7	10	18.67	30		14	7	0	1	1	0	1	1	1	0	1	3
87	1	2				10		40	1		8.7	55		10	7	3	0	1	1	0	1	0	1	0	7
79	1	1	155	62	25.8065	23	1	95	8	20.01	18.87	15	19.67	11	6	3	1	1	1	0	0	0	0	0	3
79	1	0	154	42.5	17.9204	16	1	95	4	13.69	8.1	40	16.3	11	2	4	1	1	0	1	0	1	0	0	2
68	1	3	152.8	60.9	26.0838	29	0	100	8	14	15.8	0	22.5	14	5	1	0	1	0	1	0	0	0	0
79	1	2	144	67	32.311	28	3	95	7	21.6	10.2	65	12	9	6	5	0	1	0	0	0	0	0	0	0
73	1	2	154.3	41.4	17.3888	26	0	100	7	10.95	19.43	40	28.5	11	5	2	1	1	0	1	0	1	0	0	1
79	1	0	159.2	59.2	23.358	17	2	100	3		21.6	15		14	6	2	1	1	0	0	0	1	0	0	3
83	1	3				16		15	0			35		12	12		1	1	0	1	1	1	0	0
81	1	0					1	10	1		10.1	30		6	9	5	0	1	0	0	1	1	1	1
75	1	0	153.2	55	23.4339	19	0	95	8	8.78	20.2	15	31	12	6	2	1	1	0	0	0	0	0	0	2
77	1	1				24	4	100	6	12	14.63	15		6	5	4	0	1	0	0	1	0	0	0	1
69	1	4	153	57	24.3496	29	0	100	8	9.42	22.1	15	22	14	5	1	0	1	0	0	0	0	0	0	2
92	1	0		64.5		12	1	75	1		14	40		11	8	5	1	1	0	0	0	0	0	0	3
86	1	2				14	4	60	0			85		10	4	5	0	1	0	0	0	0	0	0	2
74	1	0	160.6	93.9	36.4061	13		100	6	9	9	50	9	12	9	4	1	1	0	0	0	0	0	0	3
75	1	4	152	62	26.8352	29	3	100	8	15.22	18.57	0	17.8	14	5	4	1	1	0	1	1	0	0	0	1
68	1	2	160	67.7	26.4453	22	0	100	3	14	23.3	15	24	14	5	2	1	1	0	0	0	1	0	0	3
82	1	2	147.7	60.6	27.7787	18	4	75	1		10.9	35		11	2	4	1	1	0	1	0	0	0	0
79	1	2				11	4	20	1			30		20	11	4	1	1	1	0	1	1	0	0	9
71	1	4	154.3	49.5	20.7909	30	1	100	8	9.69	21.1	15	14	12	3	1	1	0	0	1	0	0	0	0	1
90	1	4	162	52	19.8141	21	1	90	4	16.16	16.9	25	18.5	7	9	5	1	1	0	0	1	1	0	0	4
89	1	2	149.1	61	27.4394	15	0	75	0		14	40		12	2		0	1	1	0	0	1	0	0
78	1	3	157	42	17.0392	16	5	100	4	19.7	9.9	40	2	6	10	5	0	1	0	0	0	1	0	0	2
77	1	2	149	48.7	21.9359	25	0	100	8	7.34	12.5	15	26.7	14	7	1	1	0	0	0	0	0	0	0	1
77	1	4	145	53	25.2081	27	1	100	8	8.66		15		14	4		0	1	0	0	0	0	0	0
84	1	0	431	45		15	1	95	3	15	4.7	15		13	5	2	0	1	0	1	1	1	0	0	2
74	1	4	161.3	63.5	24.4065	30	1	90	8	13.14	24.2	30		14	1	0	0	0	0	1	0	0	0	0	2
83	1	2	145	62	29.4887	27	4	100	4		14	15		14	9	4	1	1	0	0	0	0	0	0	5
83	1	2	153.1	55.3	23.5925	18	3	85	5	25.62	19.9	55	19.9	14	3	2	0	1	0	1	0	1	0	0	1
75	1	0	155.1	65.6	27.2697	22	1	80	5	14.27	16.5	65		13	1	4	1	1	0	0	0	1	0	0	3
91	0	0	143.5	63	30.594	15	0	80	6		13.7	40		14	0	2	0	0	0	1	0	0	0	0	2
84	1	0	152	83	35.9245	12	0	65	0		12.6	40		12	8		1	0	0	0	0	1	1	0
84	1	0		66.6		13	0	60	1		5.9	65		13	7	4	1	1	0	0	0	0	0	0	2
80	1	2	145.8	40.4	19.0049	18	0	55	0		8.4	40		11	11	3	1	0	0	1	1	0	0	0	4
72	1	2	148	84	38.35	27	1	100	5	14.6	13.13	15	7.47	14	2	3	1	0	1	0	0	0	0	0	3
71	1	2	152.4	57	24.5417	29	1	95	7	18.25	13.7	25	24.3	14	7	3	1	0	0	0	0	0	0	0	2
73	1	1	159	67	26.5021	13	0	90	2		10.6	15		10	7		0	0	1	0	1	1	0	0
81	1	0				12	1	70	1		16.1	65		10	3	4	0	0	0	0	0	1	0	0	1
81	1	0				15	4	90	2		13.63	65		10	4	4	0	1	0	1	0	0	0	0	3
95	1	5						0	0			30		10	3	3	1	1	0	0	0	1	0	0	2
83	1	2	157	61.4	24.9097	15	5	70	1		11.4	60		12		4	1	1	0	0	1	0	0	0	7
86	1	2				21	1	70	5			95		8	0		0	0	1	0	0	1	0	0
66	1	2	155	69	28.7201	29	3	100	7	10	23.6	15	22	14	11	0	1	1	0	1	1	0	0	0	5
65	1	5	150	58.1	25.8222	30	0	100	8	7.73	17.5	15	24	13	8	1	1	1	0	0	0	0	0	0	4
65	1	4	162	36	13.7174	17	1	85	2		3.2	40		8	3	4	1	0	0	0	0	0	0	0	1
65	1	5	163.2	66.8	25.0805	30	0	100	8	9.43	21.9	15	21	14	6	0	1	1	0	1	0	0	0	0	4
56	1	5	166.5	68	24.529	27	1	100	8	5.3	30.8	0	34	14	0	0	0	0	0	0	0	0	0	0	0
86	1	2				12	2	90	1	12.32	17	40		13	5	3	0	1	0	0	0	1	0	0
69	1	2	162	71	27.0538	29	3	100	8	14.21	21.4	15	25	14	9	0	1	1	0	0	0	0	0	0	3
67	1	2	154	54	22.7694	29	4	95	8	13.37	17.8	25	27	14	2	3	1	0	0	0	0	0	0	0	2
84	1	2	141	51	25.6526	26	4	90	7	12.58	12.1	40	24.8	12	9	3	1	1	0	1	1	0	0	0	6
78	1	5	150	55	24.4444	20	0	80	5			25		14	4		1	0	0	0	0	1	0	0
71	1	3	151	53.6	23.5077	22	4	90	8	12.95	14.4	25	32.7	9	9	3	0	0	0	1	0	1	0	0	4
84	1	3	151.3	51.8	22.6283	29	0	90	8	12.91	24.5	15	22	13	1	0	0	1	0	0	0	0	0	0	1
97	0	4	156	47.1	19.354			90	0			30		8	12		0	1	0	1	0	1	0	1
93	0	3	173	58	19.3792	20	1	95	3	15.6	29	50		14	4	3	0	1	0	1	0	0	0	1	2
84	0	3	167	64	22.9481	25	1	90	5	13.6	29.8	30		12	2	2	1	0	0	1	0	1	0	0	2
95	0	2				25	1	85	3		23.1	40		14	10	3	0	1	1	0	1	0	0	1	5
87	0	2	160.2	60.8	23.6907	18	2	95	3	16.8	23.3	40	18	11	6	5	1	1	0	1	1	1	0	0	2
90	0	3	166	74	26.8544	24	3	85	5	17.5	19.8	15		11	14	3	1	1	0	1	1	0	0	1	3
84	0	3	166.8	61.1	21.9608	26	0	25	8	18	17.8	0	14.3	13	10	3	1	1	0	1	1	0	0	1
69	0	5	168	78	27.6361	28	0	100	8	7.66	21	15	32	14	3	3	1	0	0	1	0	0	0	0	2
89	0	5	172	90.2	30.4895	22	3	85	5		25.4	40		13	9		1	1	0	1	1	0	0	0
89	0	5	162	56	21.3382	28	0	100	8	6.63	31.03	0	26	14	5	0	0	1	0	0	0	0	0	0
70	0	5	175	69.1	22.5633	22	3	40	0		15.6	65		11	20	5	1	0	0	1	1	1	0	0	2
88	1	3	140	40.6	20.7143			15	0			65		6	0		1	1	0	0	0	1	0	0
80	1	2	147.5	44.5	20.4539	25	2	100	6	15.14	18.9	40	21.2	7		2	0	0	0	0	0	1	0	0	1
80	1	2	150.2	43.7	19.3705	26	2	100	7	16.35	14.9	25	33	12	2	3	0	0	0	0	0	0	0	0	1
79	1	2	154	54	22.7694	19	2	75	1		6.2	40		11	16	3	0	1	0	0	1	1	1	0	5
70	1	3	156.5	64.1	26.1715	30	3	100	7	13.62	22.3	15		12	9	0	0	1	0	0	0	0	0	0	3
76	1	1	153	53	22.6409	25	3	50	3	29.37	6.17	25	8	11	18	4	1	1	0	1	0	0	0	0	9
83	1	0	155	48.8	20.3122	18	4	90	3	17.09	19.9	15	23	9	0	3	0	1	0	0	0	0	0	0	2
89	0	2	152	55	23.8054	28	0	100	6			15		14	0		1	0	0	0	0	0	0	0
72	0	2	160	57	22.2656	23	1	85	2		23.1	40		11	6	4	0	0	0	0	0	0	0	1
84	0	5	160	55	21.4844	26	1	100	5	19.5	26.5	15		13	1	4	0	1	0	0	0	0	0	0	1
70	0	5	165	81	29.7521	28	0	100	5	6.04	32.8	15	21	14	11	1	1	1	0	1	0	0	0	0	3
89	0	5	148	64.6	29.4923	28	0	85	8	14.63	22.3	30		14	2	2	0	1	0	0	0	0	0	0	2
87	0	4	165.4	70.6	25.8068	21	0	90	8	18	31.6	35	18	14	3	2	0	0	0	0	0	1	1	0	1
87	0	5	166	58	21.048		1	55	0		20	40		9	8		1	1	0	0	0	0	0	0
84	0	5				11		90	3					13	1		0	0	0	0	0	0	0	0
87	0	2	160	84	32.8125	28	0	85	7	16.06	31.47	15	15.33	14	7	4	1	1	0	0	0	0	0	0	4
94	0	5	173.6	69.6	23.0946			60	0		22.9	50		12	9	4	1	0	0	1	0	1	0	1	3
69	0	5	159	66	26.1066	28	0	100	7	9.47	35.1	15	31	12	9	0	0	0	0	1	0	0	0	0	3
89	0	5	162.6	48.8	18.4577	24	0	85	4	12	21.6	30		7	3	0	0	0	0	0	0	0	0	0	0
84	0	4	168	57	20.1956	26	0	100	7	15	29.66	30		12	12	1	0	1	0	1	1	0	0	1	2
82	0	5	164	50	18.5901	27	0	100	8	9.1	26.23	15	39.5	11	0	0	0	0	0	0	0	0	0	0	0
85	0	3	167.5	63.3	23.6103	27	2	100	5	20	27.47	40		13	8	2	0	1	0	1	0	0	0	1
89	0	1	161	66	25.462	19	3	85	7		21.9	40		14	3	4	0	0	0	0	0	0	0	0	0
93	1	1				14	2	10	0		7.5	35		9	4	3	0	0	0	0	0	0	0	0	1
76	1	1	151.3	57.5	25.1183	23	0	95	7	14.44	14.6	15	15.2	14	1	2	0	1	0	0	0	0	0	0	1
80	1	4	154.9	53.8	22.4223	29	3	90	4	17.59	12	40		11	4	4	0	1	0	1	0	0	0	0	2
66	1	4	151.9	51.9	22.4932	26	0	100	8	7.2	18.8	0	23.3	14	0	0	0	0	0	1	0	0	0	0	0
93	1	5				24	0	95	6	12.67	17.4	30		10	5	3	0	1	0	0	0	1	0	0	4
76	1	0	154	108.9	45.9184	17	1	60	1		22.1	65		12	10	3	1	1	0	0	1	1	0	0	5
81	1	0	148.3	44.6	20.2793	24	1	100	2	28	16.7	30		11	4	4	1	1	1	1	1	1	0	0	0
79	1	2				21	1	50	0		6.3	15		7	5	4	0	1	0	0	1	1	0	0	4
86	1	3	152.4	59.1	25.4459	11	1	55	1		12.7	75		11	3		0	1	0	0	0	0	0	0
80	1	2	153	58	24.7768	23	2	90	3	17.22	15.3	35		12	9	4	1	1	0	0	0	1	0	0	4
66	1	5	156	54	22.1893	30	0	100	8	12.72	14.1	15	27	13	13	1	1	1	0	0	0	0	0	0	4
85	0	5	160.6	73.5	28.4968	21	0	95	4	11.25	14.77	15	18	14	9	3	0	1	0	1	1	1	0	0	1
85	0	5	158	57	22.8329	21	1	85	0	16.77	13.3	25	13.2	13	11	4	1	1	0	1	1	0	0	0	4
71	0	4	179	89	27.7769	27	3	100	6	11.33	30.83	15	18	12	3	2	1	0	0	0	1	0	0	0	1
71	0	2	159.3	60.3	23.7622	30	0	100	8	12.36	34.1	15	21	14	10		0	1	1	0	1	0	0	0
71	0	5	171	55	18.8092	30	1	100	7	7.5	34.6	15	30	11	1	0	1	1	0	0	0	0	0	0	1
66	0	3				25	3	100	7	10	27.2	15		14	7	2	0	1	0	0	0	0	0	1	1
84	0	4	163	59.9	22.5451	26	5	95	6	32	25.47	65		11	13	3	1	1	0	0	0	0	0	0	8
88	0	5				25	2	100	4	7.98	22.5	0		13	0	1	0	0	0	0	0	1	0	0	1
86	0	5	176.1	70.8	22.83	28	0	100	7	11.8	21.54	15	20.5	13	9	1	0	0	1	0	0	0	0	0	3
90	0	5	162	65	24.7676	25	0	95	4			40		14	17	1	1	1	0	1	1	0	1	0
88	0	5	164	66	24.539	30	0	90	6	19.8	21.67	30	19.83	13	15	3	1	1	0	1	1	0	1	0	2
74	0	5	163	58	21.9	30	0	100	8	9	35.27	15		13	6	0	0	1	1	1	0	0	0	0	2
74	0	5	165.8	67.7	24.6275	27	0	100	6	12.6	25.8	25		14	4	2	1	1	0	1	0	1	1	0	1
85	0	5	165.5	58.1	21.5	28	1	100	8	10.8	27.8	15	34	13	3	3	0	1	0	0	1	0	0	0	2
81	0	5	165	84	30.85	30	1	95	5	14	28.9	15	15.67	14	10	0	1	1	0	1	1	0	0	0	5
84	0	2	169	79.9	27.9752	21	2	100	7	12	29.3	30	29	13	10	3	0	1	1	1	0	1	0	0	1
87	0	3	152	52	22.5069	27	3	95	7	24.05	27.3	25	22	12	7	3	0	1	0	1	1	0	0	0	2
73	0	2	164	63.5	23.6095	19	1	100	3	13.75	27.56	30	15	13	2	2	1	0	0	0	0	1	0	0	0
91	0	5	158.2	49.9	19.9383	18	0	70	1	33.63	12.4	55		12	8	3	0	1	0	0	0	0	0	1	3
83	0	2	159	64	25.3155	17	1	85	6	26.04	24.8	65	24.8	14	5	4	0	1	1	1	1	0	0	0	4
81	0	5	166	65	23.5883	25	0	100	8	12.33	24.37	40	23	14	9	2	1	1	0	0	1	0	0	0	2
77	0	4	166.1	72.6	26.3146	28	0	100	5	16.82	27.6	50		14	7	1	1	1	1	0	1	0	0	0	7
79	0	5	153.9	58.3	24.6145	26	1	95	2	16.42	25	40		14	7	3	1	1	0	0	0	0	0	0	3
91	0	5	169.5	71.9	25.0259	29	0	85	5	16.87	21.9	25		14	6	4	1	0	0	0	1	0	0	1	7
75	1	4	157.9	56.2	22.5409	28	0	100	8	8	28.5	15	36	14	2	0	0	1	0	0	0	0	0	0	2
66	1	4	158.3	50.2	20.0328	26	0	100	8	6.16	21.5	15	33	12	4	0	1	1	0	0	0	0	0	0	5
74	1	4	149.6	64.5	28.8202	29	0	100	7	14.38	14.7	15	29.9	14	3	2	1	1	0	0	0	0	0	0	3
89	1	5		67.1		15	0	90	2	19.73	11.3	25	13	13	0	4	0	0	0	0	0	1	0	0	1
66	1	2	153.9	77.2	32.5942	27	1	100	7	7.3	30.9	15	23	14	7	0	1	1	0	0	0	0	0	0	3
83	1	3	153	55.4	23.6661	21	1	65	1		21	50		9	9	3	1	0	0	1	1	1	0	0	8
66	1	5					0	100	8	14.67	19.4	40	33.5	14	5	1	1	1	0	0	0	0	0	0	2
85	1	0	150.2	47.3	20.9663	17	2	95	5	22.88	13.1	65		11	6	3	0	1	0	1	0	1	0	0	3
94	1	3	147.5	41.4	19.029	12		75	3		10.9	55		8	6	4	0	1	0	0	0	0	0	0	2
88	1	1	143	36.7	17.9471	19	0	85	2	21.3		50	8.6	7	0	3	0	1	0	0	0	1	0	0	2
75	1	4	160	67	26.1719	28	0	100	8	6.95	26.3	15	29	14	7	0	0	1	0	0	0	0	0	0	2
75	1	2	153	55	23.4952	23	3	90	1	13	5.2	15		10	6	5	1	1	0	0	0	1	0	0	3
81	1	4	156.5	55.4	22.6194	25	2	90	4	27.66	14	40		13	6	4	1	1	0	1	0	0	0	0	3
66	1	3	154.5	70.8	29.6604	29	0	100	8		20.4	15		14	5		1	1	0	1	0	0	0	0
84	1	0	152	60	25.9695	16	0	100	5	9	12.6	0	18	14	4	3	1	1	0	0	1	0	0	0	1
65	1	4	154	58	24.4561	30	2	100	8	9.34	23.6	0	34	14	3	0	0	0	0	0	0	0	0	0
72	1	4	153.9	42.7	18.0281	30	0	90	8	8.72	18.1	40	30	11	0	0	0	1	0	0	0	0	0	0	4
71	1	5	160.9	62.9	24.2962	29	1	95	8	12.87	30.7	15	17	12	3	0	0	1	0	0	0	0	0	0	2
71	1	4	150	63	28	17	0	70	2		19.6	55		12	11	3	1	1	0	0	0	1	1	0	4
76	1	3	149.7	54.1	24.1409	23	3	100	7		3.3	25		10		4	1	1	0	0	0	1	1	0	6
81	1	2	153	51	21.7865	28	0	95	4	14.31	15.6	15		13	10	3	1	1	0	1	0	0	0	0	3
90	0	1	171	60	20.5191	11	1	55	0	21.66	22.1	25		8	2	3	0	0	1	0	0	0	0	0	1
82	0	3	169.7	77.2	26.8073	28	0	100	5	5.15	29.2	15	34.5	14	8	0	1	1	0	1	0	0	0	0	5
71	0	4	163	80.5	30.2985	27	1	100	5	16.54	25.1	25	28	14	5	4	0	1	1	0	0	0	0	0	2
85	0	4				17	0	85	2		26.8	60		12	4	2	1	1	0	0	0	0	1	0	3
93	0	3	165	65	23.8751	16	1	30	0		9.7	75		12	9	4	0	1	0	1	0	1	0	0	3
84	0	0	164.7	70.5	25.9897	20	0	100	3	18.13	33.2	15	17	14	2	1	0	1	0	0	0	1	0	0	2
93	0	2	168.8	59.5	20.882		1	70	3	6.75	15.5	80	15	9	3	2	0	0	0	0	0	1	0	0	1
84	0	4	174	70	23.1206	17	1	85	3	28	26.3	30		13	6	1	1	1	0	1	0	1	0	1
90	0	1				20	1	80	2	41.15	16.67	75		10	8		0	1	0	0	1	0	0	0
77	0	2	161.1	41.1	15.8362	26	0	100	5	16.72	22.8	40		10	1	4	0	0	0	0	0	1	0	0
71	0	5	163	62.5	23.5237	30	1	90	5	13.21	35.9	15	24	12	6	0	0	1	1	0	1	0	0	1	3
66	0	5	176.6	112	35.9118	28	0	100	6	9	41.53	15	9	14	7	1	1	1	0	0	0	0	0	0	2
79	0	2	168.8	56.1	19.6887	27	1	100	5	13.8	33.1	25	22.2	7	7	2	0	0	1	1	0	0	0	1	2
71	0	4	156.5	57	23.2727	28	1	100	8	10.52	16.9	15		14	4	1	1	1	0	0	0	0	0	0	2
73	0	5	173.6	91.4	30.3282	30	0	100	7	8.19	36.7	15	39.3	14	8	0	1	1	0	1	0	0	0	0	2
84	0	5	160	58	22.6562	29	0	100	7	15	14.2	30	12	14	4	3	1	0	0	0	0	1	0	0	1
65	0	5	167.9	74.5	26.4274	30	0	100	8	8.17	35.5	15	32	14	2	0	1	1	0	0	0	0	0	0	3
88	0	5	173.2	73.4	24.4681	22	1	100	2	8.78	30.9	15	35.5	13	0	1	0	0	0	0	0	1	0	0	1
83	0	3	173.6	62	20.5727	21	2	100	4	15.65	23.4	15	31.2	12	4	3	1	0	0	0	0	1	0	0	3
86	0	0	160	79	30.8594	28	0	80	8	38	30.2	30	12.4	14	9	3	1	1	0	0	1	0	0	0	2
89	0	2	165.6	58.1	21.1863			0	0			50		8	2	4	0	1	0	0	0	1	0	0	3
83	0	2	151.2	50	21.8709	27	3	90	4	17.58	16.2	15	20.3	12	7	4	1	1	0	0	0	0	0	1	3
84	0	5	169.9	83.3	28.86	25	1	100	7	27	22.13	80	14.83	14	14	4	1	1	0	1	0	0	0	0	3
67	0	5	168.9	64.1929	22.5023	30	0	100	6	9.8	31.7	15	31	14	16	0	0	0	0	1	0	0	0	0	2
72	0	4	168	75	26.57	28	2	95	8	7	44.97	15		14	5	2	1	1	0	0	1	0	0	0	2
87	0	5	168	62	21.9671	22	2	90	3	40.1	5.6	75		13	10	3	0	1	1	1	1	0	0	0	0
65	0	5	166	75	27.2173	27	1	100	8	10.5	40.8	15	31.67	13	6	2	1	1	0	0	0	0	0	0	2
90	0	5	171.8	72.1	24.4281	28	0	100	8	15.75	23	40	24.8	14	5	2	1	1	0	1	1	0	0	0	5
71	0	5	162.5	69	26.1302	28	0	100	7	10.93	30.5	15	34.4	12	8	0	1	1	0	1	0	0	0	0	2
66	0	4	167	54	19.36	27	5	100	7	11.21	9.5	35	12.67	10	0	5	0	0	0	0	0	0	0	0
89	0	5	155.2	56.9	23.6227	26	2	75	3		26.3	40		12	11	4	0	1	0	0	0	0	1	0	2
88	0	4	171.5	61	20.7397	25	0	100	8	9.06	47.8	15	28	12	9	0	0	1	0	0	1	0	0	0	2
85	0	5	158.1	61.2	24.4843	28	2	90	4	17.6	28.8	40		14	12	2	0	1	1	1	0	0	0	1	4
65	0	4	161.4	67	25.7198	30	0	100	8	9.14	33.1	15	27	14	0	0	0	0	0	0	0	0	0	0	0
91	0	2	163.6	69.5	25.9668	20	0	80	2		21.5	55		13	4	3	0	1	1	1	0	0	0	1	3
85	0	4	158	54.5	21.8314	26	0	100	8	18.48	26.4	25		13	7	2	1	1	0	1	1	0	0	0	4
89	0	2				7	1	10	0		6.5	30		7	1	5	0	0	0	0	0	1	0	0	1
90	0	2	157	51	20.6905	18	5	80	3			40		9	11		0	1	0	1	0	1	0	0
86	0	5	160	75.2	29.375	26	0	100	7	9.5		30		14	12		1	1	0	1	0	0	0	0
85	0	0	162	78.2	29.7973	26	0	95	5	14.64	21	25		14	5	4	0	1	0	0	0	0	1	0	1
85	0	3	158	57	22.8329	22	3	75	6		16.9	50		10	11	3	0	1	0	0	0	0	1	0	1
88	0	4	163.2	66	24.7801	29	0	90	4	8	31.5	55	21	14	5	3	0	1	0	0	1	0	0	0
87	0	2	171	62	21.2031	24	1	90	8	26.88	31.3	30	17.9	11	0	4	0	1	0	0	0	0	0	0	0
84	0	1	156	70.1	28.8051	18	0	85	3	35	15.77	65		12	8	3	0	1	0	1	0	0	0	0	1
82	0	5	163.4	68.7	25.7308	15		75	0		12.9	40		9	10	4	1	1	1	0	0	1	0	0	4
86	0	1	159.9	54.9	21.4721	28	0	100	8	15	23.87	30	17	13	7	2	1	1	0	0	1	0	0	1	3
89	0	5	159.7	47.5	18.6245	29	0	85	4	21.34	17.4	25		11	2	4	0	0	0	0	0	0	0	0	2
83	1	2	155	53	22.0604	14	1	70	2		8.4	50		12	6		1	1	0	1	1	1	0	1
71	1	5	158.4	54.2	21.6017	30	0	100	8	4.2	23.7	0	40	14	0	0	0	1	0	0	1	0	0	0	0
68	1	2	157	80	32.4557	30	0	100	7	7.86	20.37	15	24.5	13	11	0	1	1	0	1	0	0	0	0	2
69	1	4	157	61	24.7475	29	0	95	7	8.91	18.8	40	33.8	12		1	0	0	0	0	0	0	0	0	0
78	1	2	147.5	66.2	30.428	13	1	65	3	20.31	8.1	40	16.2	14	4	2	0	1	0	0	0	1	0	0	1
73	1	0	162	67	25.5296	19	0	100	6	19.14	24.8	15	17	14	6	4	1	1	0	0	0	0	1	0	3
76	1	3	159	62.5	24.7221	26	3	100	8	10	23.5	15	21	14	1	2	1	1	0	0	0	0	0	0	1
78	1	1	154.1	48.6	20.4659	27	4	100	7	15	20.43	15		11	6	5	0	1	1	1	1	0	0	0	1
78	1	0	157	63.5	25.7617	27	2	90	7	14.5	8.3	65		13	9	3	1	1	0	0	0	0	0	0	2
91	0	2		59		11	2	45	2		0	75		13	8		1	1	0	0	0	1	0	0
85	1	0				19	1	95	6		14.9	50		11	9	3	0	0	0	1	0	1	0	0
79	1	2	151.8	68	29.5097	24	0	90	8	13.22	21.9	40	32	14	5	0	1	0	0	1	0	0	0	0	3
68	1	1	142.5	49.4	24.3275	21	2	80	8		16	25		13	2	4	1	0	0	0	1	0	0	0	2
93	1	5	142	36	17.8536	23	1	70	0		15.3	55		10	7		0	1	0	1	0	1	0	0
75	1	1	147.3	59.1	27.2384	26	1	100	8	12.67	14	65		14	6	1	0	1	0	0	0	0	0	0	1
86	1	0	141.2	44.1	22.1192	29	0	100	4	14.49	12.4	15	12.4	13	0	2	0	0	0	0	0	1	0	0	1
72	1	2	158.8	64.8	25.6965	25	0	100	8	9.7	23.1	15		14	7	0	0	1	0	0	0	0	0	0	2
66	1	2	156.8	40.8	16.5946	29	1	90	8	11.27	18.8	15	17	8	8	0	0	0	0	1	0	0	0	0	0
91	0	1	157	56	22.72	19	0	95	8	20	29.57	30		13	3	1	0	1	0	1	0	0	0	0	1
88	0	2	171	69	23.597	24	0	70	2		21.2	65		12	12	3	0	0	0	0	1	0	0	0	4
70	0	2				21		65	1			50		2	8		0	1	1	0	0	0	0	0
85	0	3	169.6	58.2	20.2335	24	0	90	8	9.87	34.2	15		12	5	0	1	1	0	1	1	0	0	0	3
83	0	2	154.9	55.7	23.2141	28	0	100	6	13.33	18.6	15	18.5	14	7	2	0	0	0	0	0	0	0	0
69	1	2	166	63.1	22.8988	24	3	100	7	20	18.7	25		14	11	4	1	0	0	0	1	0	0	0	1
71	1	5	161	64	24.6904	30	0	95	7	12.5	31	40	31	13	5	1	0	1	0	1	0	0	0	0	2
88	0	5	160	59	23.0469	16	1	60	0		19.5	80		12	12		1	0	0	1	1	1	0	0
87	0	1		68		9	2	80	0	57.43	16.7	40		10	5	4	0	1	0	0	0	0	0	0	2
77	0	3	156	57	23.4221	27	4	100	5	21.3	24.4	0	23	14	12	3	1	1	1	1	1	0	0	0	3
88	0	5				25	3	70	1		15.7	70		6	7	3	1	0	0	0	0	1	0	0	2
86	0	3	154	53	22.3478	11	0	20	0		16.53	15		8	4	5	0	1	0	0	0	0	0	0	1
92	0	4	163.4	72.5	27.154	30	0	75	2		21.5	50		14	14	3	0	1	1	1	1	0	1	0	4
94	0	5	174	63	20.8086	28	2	90	4		37	15		12	12	0	0	0	0	1	1	0	0	0	0
84	0	1	151	52	22.806	15	2	70	3		16.4	50		13	3	4	0	1	0	0	0	0	0	0	3
90	0	2	167.5	74	26.3756	30	0	90	7	18.16	20.9	55	15	11	13	4	1	1	0	1	0	0	0	0	1
87	0	4	165	55	20.25	29	0	90	8	20	28.5	15		12	6	1	1	0	0	1	0	0	0	1
89	0	0	148.8	42.5	19.1948		1	90	6		10.3	40		9	10	5	0	1	1	0	0	0	0	0	3
90	0	5	170.2	67.6	23.3361	22	0	75	0	15	30	40		13	8	4	0	1	0	0	0	1	0	1	3
70	0	2	171.9	71.6	24.2304	29	0	100	8	7.72	29.6	15	40.2	14	9	0	1	1	0	0	0	0	0	0	2
90	0	5	170	54.3	18.7889	26	0	75	2	21.65	19.7	25		6	9	5	1	1	1	0	1	0	0	0	3
90	1	4	164	56	20.82	24	0	95	6	25	23.27	40		12	3	1	1	1	0	1	1	0	0	0	2
91	0	5				11		40	0		7.9	90		9	12	4	1	0	0	0	0	1	1	0	2
80	0	5	170	63	21.7993	25	2	100	7	19		0	17	13	0		0	0	0	0	0	0	0	0
87	0	3	154	43	18.1312	24	1	100	8			30		11	7		1	1	1	0	0	0	0	0
86	0	2	155	50	24.8	20	4	90	5	23.97	20.7	25	14	11	2	4	0	1	0	0	0	0	0	0	0
90	0	2				28	2	85	3	13.42	15.7	30		14	15	2	0	1	1	0	0	1	0	0	5
82	0	5	162.1	51.1	19.4471	29	4	95	8	8.95	36.4	25	26	10	0	1	0	0	0	0	0	0	0	0
87	0	5	164.3	61.8	22.8936	21	1	90	6	12.68	29.3	40	17.5	13	3	0	0	0	0	0	0	0	0	0	0
87	0	4	158	53	21.2306	13	2	80	0		7.3	40		11	14		0	0	0	0	1	1	0	1
87	0	4	162.6	69	26.098	28	0	100	8	11.98	31.1	15	18	11	5	0	0	1	0	0	0	1	0	0	3
85	0	4	169	44.5	15.5807	20	5	85	1		24.6	50		8	2		0	0	0	0	0	0	0	0
86	0	3	156	46	18.902	23	0	100	8	25	19.53	40		10	4	2	0	1	0	1	1	0	0	0	1
85	0	3	175	71	23.1837	25	1	100	7		27.77	30		14	5		1	1	0	0	0	0	0	0
89	0	2	163	65	24.4646	28	0	90	6	28		50		14	4		0	1	1	1	0	0	0	0
96	0	2	161	86	33.1777	23	1	95	1	13.9	18.57	25	20	14	5	4	1	1	0	1	1	1	0	1	2
83	1	0	158.5	65	25.8735	17	1	60	1		14.3	40		13	4	4	1	0	1	1	0	0	0	0	2
74	1	2	155	70	29.1363	26	0	100	7	18	26.7	15	20	14	5	0	1	1	0	0	0	0	0	0
73	1	3	150	65	28.8889	30	2	95	7	11.83	18.6	25	23.5	14	7	2	1	1	0	0	0	0	0	0	5
85	1	2	154.3	48.9	20.5389			80	1			40		7	2		1	1	0	0	1	1	1	0
73	1	2	163	70	26.3465	29	1	100	8	12.6	21.1	0	34	14	6	0	1	1	0	0	1	0	0	0	1
103	1	5	148	41	18.718	14	2	75	0			50		10	5	4	0	1	0	1	0	1	0	0	2
74	1	1	156.9	59	23.9666	22	0	100	8	18.43	17.33	15	19.67	14	7	2	0	1	0	0	0	1	0	1	1
88	1	3	152.5	58.7	25.2405	20	2	70	1		12.3	50		7	4	4	0	0	0	0	0	0	0	0	0
97	1	3		60.8		3		10	0			75		12		4	1	1	0	0	0	0	0	0	3
75	1	5	149	41.6	18.7379	28	1	100	7	20.45	12.27	40	25.5	9	6	4	0	1	0	1	0	1	0	1	3
78	1	4	161	55.5	21.4112	18	4	100	4	18.18	16.9	65		11	0	5	0	1	1	0	0	0	0	0	2
85	1	2	151.6	48.2	20.9724	25	4	100	5	12.1	15	15		12	5	2	1	1	0	0	0	1	0	0	3
69	1	3	153.6	54.2		29	0	100	8	8.87	17.8	15	24	13	1	1	0	0	0	0	0	0	0	0	0
68	1	2	150	54.7	24.3111	30	0	100	8	9.03	17.5	15	33.5	12	4	1	0	0	0	0	0	0	0	0	2
65	1	2	156.1	61	25.0336	27	0	95	5	11.36	20.1	15		14	10	0	1	1	0	1	0	0	0	0	3
79	1	2	150.5	70	30.9047	19	1	85	7	19.72	13.6	25		14	7	2	0	1	0	1	0	1	0	0	2
88	1	3	142.6	62.5	30.7355	26	0	100	4	13	10.6	40	17.3	12	9	2	0	1	0	0	0	1	0	0	3
84	1	4	140	47.5	24.2347	20	1	85	3		17.8	40		13	15	3	0	1	0	0	1	1	0	0
73	1	2	146.6	63	29.3138	27	0	100	8	6.7	20	15	19	14	2	0	1	1	0	0	0	0	0	0	2
73	0	4	161	45.3	17.4762	30	1	90	7	8.73	31.5	15		10	1	1	0	0	0	0	0	0	1	0	1
65	0	5	173	67.8	22.6536	27	1	100	7	8.21	35	15	24	13	6	2	1	1	0	0	0	0	0	0	2
85	0	4	166.3	67.6	24.4434	23	0	100	6	13	23.8	15	12.3	14	7	3	1	1	0	0	1	0	0	0	1
81	0	5	168.2	74.8	26.4393	30	0	100	7	13.06	23.2	15	33.8	14	3	2	0	1	0	1	0	0	0	0	1
85	0	3	162.4	59	22.3707	25	2	90	1	28	15.87	50		9	13	2	1	1	1	1	1	0	1	0	4
70	0	5	171.5	70	23.7996	29	0	100	7	7.44	41.8	15	41.2	14	3	0	1	0	0	0	0	0	0	0	2
68	0	5	167.8	90.6	32.1769	27	1	90	5	8.92	30.2	15		14	11	1	1	1	0	0	0	0	0	0
91	0	1	165.9	71.2	25.8695	13	4	95	6		20.3	40		11	9	3	0	1	0	0	1	0	0	0	5
93	0	5				9		30	0		11.5	105		10	6	4	0	1	1	1	1	0	0	0	2
84	0	5	159.7	49.9	19.5655	23	2	80	4	22	23.33	65	0	11	8	1	0	1	1	1	1	0	0	0	1
76	0	5	171.5	80.5	27.3695	26	0	95	3	16.64	35.9	40	23.3	14	10	1	1	0	0	0	0	0	0	0	7
68	0	5	171	73	24.9649	29	3	90	4	10.25	31.8	0	29.6	14	15	1	0	0	0	0	0	0	0	0	1
95	0	4	165	62.7	23.0303	28	1	65	2		14.4	40		13	6	3	0	1	0	1	1	0	0	0	4
74	0	2	158.4	62.4	24.8699	30	0	95	7	9.39	29.1	15	35	14	3	0	0	0	0	0	0	0	0	0	4
91	0	2	153	44	18.7962	17	0	85	2		16.9	65		7	5	3	0	0	0	0	1	0	0	0	3
84	0	2	149	64	28.8275	30	1	100	8	12	23	30	9.5	12	0	3	0	1	0	0	0	0	1	0	1
88	0	5	165	70	25.7117	26	4	75	4		23.06	50		14	10	3	1	1	1	0	1	0	0	0	2
86	0	3	167	65.5	23.486	30	1	80	4	40	27.33	40		14	7	1	0	1	0	1	0	0	0	0	1
89	0	5	999	55		28	1	90	1	21	13.6	25		14	0	4	0	0	0	0	0	0	1	1	0
83	0	2	170	83.2	28.7889	16	1	70	3	51.2	15.3	90		12	8	3	1	1	0	0	1	0	0	1	1
74	0	5	166.7	75.8	27.2771	26	1	100	5	9.66	25.8	15	26	14	4	2	1	1	0	0	0	0	0	0	2
90	0	4	168	71.2	25.2268	15	0	100	2	21.16	30.1	15	30	14	10	1	1	1	0	1	1	0	0	0	5
77	0	3	162.4	62.9	23.8495	30	0	95	6	12.48	34.1	25	26.5	14	13	2	1	0	0	1	1	0	0	0	7
92	0	4	161.3	62.9	24.1759	20	0	90	1	15.44	26	15		14	0	2	0	0	0	0	0	1	0	0	2
85	0	2	157	55	22.3133	26	1	100	7	7	24.6	15	37	12	0	1	0	0	0	0	0	0	0	0
84	0	1	159.5	46.5	18.2781	23	2	100	7	17	11.4	35	13.6	11	6	4	0	1	0	1	0	0	0	0	1
86	0	4	170	78.8	27.2664	30	1	100	3	21	27.1	55	17	13	6	4	0	0	0	1	0	0	0	0
82	0	2	162	74	28.1969	28	0	100	8	28.43	28.43	30		13	10	1	1	1	0	1	1	0	0	0	2
83	0	1	161	53	20.4467	27	0	95	8	16	25.6	30		12	4	1	1	1	0	1	1	1	0	0	2
71	0	2	160.6	62.1	24.0769			75	1		13.5	95		13	10	4	1	1	0	0	0	1	0	0	5
69	0	5	165	67	24.6097	29	0	100	5	6.87	43	15	32	14	2	0	0	1	0	0	0	0	0	0	2
75	0	5	152	55	23.8054	27	1	100	6	20.4	28.8	30	28.2	14	5	1	1	1	0	0	1	0	0	0	3
90	1	1	162.3	55.2	20.9557	19	1	100	5	11.49	17.57	25		12	7	3	1	1	0	0	0	0	0	0	2
66	0	4	165	69.5	25.528	28	1	100	7	8.65	29.2	15	28	14	14	1	1	0	0	0	0	0	0	0	2
70	1	2	155	51	21.2279	18	0	100	5	11.41	23.6	30	24.8	12		0	0	1	0	1	0	1	0	0	2
72	1	4	156.8	64	26.0308	27	1	90	6	15.42	17.6	50	20.83	13	10	4	1	1	1	0	1	0	0	0	3
73	1	4	156	66.3	27.2436	29	0	100	8	8.56	21	15	27	14	10	0	0	1	1	1	0	0	0	0	3
67	1	4				4		15	0		0	55		4	7		1	0	0	0	1	0	0	0
83	1	2	142.8	51.9	25.4514	24	0	100	8	8.85	16.8	15	27	13	0	1	0	1	0	1	0	1	0	0	3
73	1	2	152.1	59.1	25.5464	25	2	100	5	12	23.2	15	17.5	14	3	1	1	0	0	0	1	0	0	0	3
71	1	2	157.6	62.1	25.0023	29	0	100	8	7.66	24.5	15	21	14	4	0	0	0	0	0	0	0	0	0	0
65	1	5	154.7	57.2	23.901	30	0	100	8	9.28	21.5	15	30	14	11	0	0	1	0	1	0	0	0	0	1
67	1	5	159	55	21.7555	24	0	100	8	7.68	20.7	15	25	13	5	0	0	1	0	0	0	0	0	0	2
67	1	3	151.2	58.2	25.4577	25	2	100	8	16.72	19.5	15	22	14	6	0	1	1	0	1	0	0	0	0	2
68	1	4	152	55	23.8054	26	2	75	4		26	65		11	3	3	0	0	0	0	0	0	1	0	1
77	1	2	162	65	24.7676	28	0	100	8	12.6	20.9	15	18	14	1	1	0	0	0	0	0	1	0	0	1
73	1	2	150.9	74	32.4977	30	1	85	7	15.05	17.2	40	16.1	12	15	4	1	0	0	0	0	0	0	0	3
94	1	4	151.4	51	22.2494	22	2	65	3		12.6	65		13	6		0	1	0	0	0	0	0	0
76	1	2	140	38.9	19.8469	19	0	100	7	11.48	18.3	30	9.5	11	9	2	0	1	0	0	0	0	0	0	2
88	1	0				14	1	85	6	20.56	12.8	25	17	14	1	2	0	1	0	0	0	0	0	0	4
65	1	5	155.1	63.3	26.3136	30	0	100	7	8.75	19.8	15	31	14	7	0	0	1	0	1	0	1	0	0	4
77	1	2	149	62	27.9267	24	2	95	6	15.37	21.5	40	25	14	2	0	0	1	0	1	1	0	0	0	3
71	1	2	145	63.8	30.3448	23	3	90	7	14.84	24.2	15	21	14	8	0	1	1	1	0	0	0	0	0	4
77	0	2	160	67	26.1719	10	5	85	5		23.6	50		10	0	4	1	0	0	0	1	0	0	0	2
90	0	2					1	15	1		19.7	15		11	7	3	1	1	0	0	1	1	1	0	3
84	0	4	163.8	35	13.0449	26	2	100	4	10.7	18.1	15		9	1	1	0	0	0	0	0	0	0	0	0
92	0	5	164.5	72.4	26.7551	20	1	30	0		18.7	65		13	5	4	0	1	0	0	0	0	0	0	3
81	0	0	157	85	34.4842	12	0	100	2	19.4	21.4	25	26	14	10	3	1	1	0	0	0	1	0	1	4
81	0	2	156.9	64.5	26.2008	26	0	100	3	17.4	28.3	15		14	1	2	0	0	1	0	0	0	0	0	2
89	0	3	160.7	72.3	27.9967	24	0	95	4	13.2	23.1	65	35.67	14	5	2	0	1	0	1	1	0	1	0	2
79	0	2	164.7	77	28.386	24	1	75	3	17.79	15.5	55		10	3	4	1	1	0	0	1	0	0	0	5
71	0	5	163.9	48.8	18.1661	29	0	100	8	6.83	34.4	15	23	11	3	0	1	1	0	0	0	0	0	0	2
72	0	2	168.5	80		30	1	90	4		47.3	40		14	18	2	1	1	0	0	0	0	0	0	4
80	0	1	155	54	22.47	28	0	100	6	14.7	22.2	15	29	13	4	2	1	1	0	0	0	0	0	0	2
83	0	2	165	63.1	23.1772	25	0	90	7	12.34	28.5	30	21.5	14	10	1	1	0	1	1	0	0	0	0	2
81	0	2	162.4	63.6	24.1149	17	2	95	7	13.86	24.5	25		12		3	1	1	0	0	0	1	0	0	3
88	0	3	169.7	54.5	18.9249		2	95	0	11.4	18	40		10	4	3	0	1	0	0	0	1	0	0	2
82	0	2	154.35	47	19.7281	16	1	45	0	21.94	29.3	40		10	9	3	1	1	0	1	0	0	0	1	4
74	0	5	166	67	24.3141	27	0	100	8	9.88	29.5	15	24.6	14		0	1	1	0	0	0	0	0	0	2
85	0	4	159	78	30.8532	28	0	100	7	14.8	32.13	30	23	14	11	1	1	1	0	1	1	1	0	1	2
83	0	3	167.7	57.7	20.5168	25	0	100	4	15.19	30.8	40	25.3	9	4	1	0	1	0	1	1	1	0	0	5
68	0	5	169.5	80	27.8452	29	1	100	7	9.62	36.8	15	31	14	13	0	1	1	0	1	1	0	0	0	4
90	0	4	167.9	53.7	19.049	25	3	100	4	9.73	29.6	15	25	12	11	0	0	1	0	0	1	0	0	1	3
77	0	3	159	53	20.9644	27	2	100	5	26	24.9	35		11	7	2	1	1	0	1	0	0	0	0
66	0	5	167.5	63.5	22.6331	29	0	100	5	11.38	38.6	15		10	7	2	0	1	0	1	0	0	0	0	3
70	0	4	165.9	79.8	28.9941	29	0	100	8	9.9	37.1	15	24	14	5	0	1	1	0	0	0	0	0	0	4
70	0	4	159.9	78.4	30.66	30	0	100	8	9.76	39.6	15	34	14	10	1	1	1	1	1	1	0	0	0	6
89	0	1	151.9	50.9	22.05	25	0	100	8	8.76	23.33	15	5.17	13	7	1	0	1	1	1	0	0	0	0	2
66	0	5	168.3	43	15.181	29	1	85	4		23.6	40		9	16	3	0	0	0	0	0	0	0	0	1
70	0	5	163.6	71.4	26.6767	29	0	100	8	7.85	38	15	29.5	14	5	0	1	1	0	0	0	0	0	0	3
90	0	3	158	51	20.4294	27	1	100	7	10.15	31.9	15	24.5	11	0	1	0	0	0	0	0	0	0	0	0
80	0	2	175.8	76.8	24.8498	27	3	95	4	13.43	34.1	15		13	11	0	0	1	0	1	0	0	0	0
88	0	0	165.2	62.9	23.0479	17		85	0		27.8	40		14	3	3	1	0	0	1	0	1	0	0	2
76	0	2	163.3	74.2	27.82	27	1	100	7	10.45	25.97	15		14	8	2	0	1	0	0	0	0	0	0	1
84	0	0	164.1	63.5	23.5807	16	0	90	4	19.79	22.7	55	15.5	13	1	4	0	1	1	0	0	1	1	0	0
72	0	2	168.2	86.4	30.5395	29	1	95	6	12.02	36.5	15	18.5	13	5	0	1	1	0	0	0	0	0	0	2
78	0	2	158.4	53.7	21.4025	21	1	100	4	12.72	15.2	15		13	6	1	1	0	0	0	0	0	0	0	2
87	0	3	166	68	24.677	23		30	0		50	50		14	7	4	1	0	0	0	1	0	0	0
90	0	4	158	53	21.2306	15	0	100	3	13.81	15.3	40		13	0	1	0	0	0	0	0	1	0	0	2
91	0	2	161	53	20.4467	28	1	100	6	10.53	42.5	15	25	12	2	0	0	1	1	0	1	0	0	1	5
66	0	5	167	68	24.3824	29	0	100	8	8.7	32.3	15	34.3	14	4	0	1	1	0	0	1	0	0	0	2
85	0	5				28	1	90	6	13.01	31	50		14	5	1	1	1	0	1	0	0	0	0	4
79	0	2	168	59	20.9042	25	3	100	3	20.76	24.3	25	17.8	7	10	4	1	1	0	1	0	0	0	0	4
81	0	3	163.5	63.3	23.6793	19		90	3		15.6	40		14	6	2	0	1	0	1	1	0	0	0	3
68	0	4	158.6	72.7	28.902	29	0	100	8	8.8	44.7	0	24	14	4	0	0	1	0	0	0	0	0	0	1
67	0	3	164	58.6	21.7876	26	0	100	4	10.69	29.5	15	28	13	11	1	1	0	0	0	0	0	0	0	1
75	0	2				13	1	70	3	25.43	24.6	65		11	3	4	0	1	0	0	1	0	0	1	5
92	0	5				21		65	0			90		7	9		0	1	0	0	0	1	0	0
65	0	2	158.1	91.6	36.6464	25	0	95	5	11.54	34.4	40	34.4	14	9	1	1	0	0	0	1	0	0	0	1
89	0	3	165.3	71	25.9844	22	1	60	5		5.7	65		13	11	3	1	1	0	1	1	0	0	1	7
83	0	4	176	67.7	21.8556		4	100	5	10.76	36.7	15	23.5	14	6	2	0	0	0	0	0	0	0	0	0
89	0	1	165	50	18.3655	23	2	80	5		15.36	50		9	7	4	0	1	0	1	0	0	0	0	2
91	0	1				11		35	0		16.8	70		9	11		0	0	0	0	1	1	0	0
86	0	5	164	75	27.8852	27	0	85	4	18.47	22.5	25		14	9	4	1	1	1	0	0	0	0	0	3
86	0	5	164.4	77.1	28.5266	27	0	95	2	13	21.9	40		14	10	4	1	1	0	1	0	0	0	0	3
78	0	3	168	68	24.09	22	1	75	6		12	60		14	4		1	1	0	1	1	0	0	0
86	1	2	152	59.5	25.7531	26	2	100	8	17	23.9	30		14	8	1	0	1	0	1	0	0	0	0	1
70	0	4	163	72	27.0993	26	0	100	7	8.15	41.2	15	23	14	3	0	0	1	0	0	0	0	0	0	0
86	0	2	159.5	67.2	26.4148	29	1	95	6	9.61	28	15	23.67	14	5	1	1	1	0	1	0	0	0	0	4
94	0	2	145.5	45.1	21.3035	12		90	1		14.8	15		12	4	1	0	0	0	0	0	1	0	0	0
85	0	3	159.6	53	20.807	23	0	80	3		25.2	65		12	8		1	1	1	0	1	1	0	0
92	0	2	158	62.2	24.9159	21	1	95	6		24.2	25		14	2	2	0	1	0	1	1	0	0	1	5
67	0	4	166.8	74.2	26.6693	24	0	100	7	8.31	33.4	30	24	14	8	0	1	1	0	0	1	0	0	0	4
67	1	3	151	45.5	19.9553	29	3	100	8	6.9	16.4	15	16.67	12	3	2	1	1	0	0	0	0	0	0	2
86	1	2	150.1	78.8	34.9756	23	1	90	1	26.75	15.6	15		14	10	3	1	1	0	1	1	0	0	1	4
66	0	3	160.1	68.7	26.8024	28	2	100	8	7.66	16.5	15	32	12	8	3	1	1	0	0	0	0	0	1	2
87	1	2	143.6	57.9	28.0782	27	0	80	5		15.6	40		14	6	4	0	0	0	0	0	0	1	0	1
66	1	3	152.1	64.3	27.7941	24	0	100	8	7.5	26.7	15	22.5	14	3	0	1	1	0	0	0	0	0	0	2
84	1	0				12	1	95	4		14.6	40		11	2	3	0	0	0	0	0	1	0	0	1
97	1	2		35.2				15	0			35		2	4	5	0	1	0	0	0	0	0	0	2
73	0	0	151.2	58.3	25.5015	17	4	90	3	23.43	8	25		12	8	4	1	1	0	0	0	0	0	0	3
73	1	0	161.9	71	27.0872	17	1	100	8	15.11	21	40		14	6	3	0	1	0	1	0	0	0	0	2
73	1	2	153.9	63.3	26.7255	28	1	100	6	16.31	16.3	15	20.3	14		1	0	1	1	0	0	0	0	0	2
71	1	2	136	45.1	24.3837	21	0	75	4	13.5		65		12	5		0	0	0	0	0	0	0	0
75	1	0	157	59	23.9361	24	0	100	7	12.39	27.1	25	23.1	14	2	0	0	0	0	0	0	0	0	0	0
89	1	0	149.3	53.7	24.091	18	0	100	7		12.5	15		14	7	2	1	1	0	0	1	0	0	0	3
72	1	2	145.5	42.5	20.0753	29	3	95	6	18.69	11.9	40		10	1	5	0	1	0	0	0	0	0	0	1
77	1	0	147.5	39	17.9259	11	1	45	1		9.4	40		8	7	5	1	1	1	0	0	1	0	0	3
89	1	0	149.6	46.3	20.688	11	0	95	6	11.69	17	25		13	5	3	0	0	0	0	0	1	0	0	1
70	1	2	156.8	69.3	28.1865	24	0	100	8	9.72	23.5	15	23	14	4	2	1	1	0	1	0	0	0	0	2
73	1	0	144	40	19.2901	18	0	100	6		16.7	15		11	8	3	1	1	0	0	0	0	0	0	2
68	1	2	152.7	60.3	25.8606	29	1	100	7	12.7	12.53	15		12	16	4	1	1	0	0	0	0	0	0
77	1	2				27	2	55	3		21.1	40		13	3		1	0	0	0	1	0	0	0
69	1	2	155	68.5	28.512	27	0	100	6	16.41	16.6	15	22	14	9	2	1	1	0	1	1	0	0	0	2
73	1	0	158	71.7	28.7214	22	0	95	5	20.03	18.9	40		14	4	2	1	1	0	0	1	0	0	0	3
77	1	0	151	48		16	3	100	2		20.5	25		11	6	3	0	1	0	1	0	0	0	0	1
80	1	0	155.8	45.5	18.7446	25	1	90	5	22.73	18.5	55		10	2	3	1	1	0	0	0	0	0	0	3
68	1	0	152	81	35.0589	16	3	95	2	21		40		14	10		1	1	0	0	0	0	0	0
77	1	0	149	49.4	22.2512	15	2	90	5	18.47	14.4	55		11		3	1	1	0	0	0	0	0	0	2
84	1	2	145.6	58.7	27.6895	29	1	70	1		13	50		13	12	4	0	1	0	1	1	0	0	1	5
71	1	2	159.2	68	26.8301	30	0	100	8	10.26	22.2	15	21	14	9	0	0	0	0	1	0	0	0	0	1
89	1	2	144.2	44.7	21.497	15	1	100	4		13.4	40		13	6	3	0	1	1	0	1	0	0	0	4
69	1	2	146.9	66.3	30.7234	28	0	75	3		14.1	25		10	7		1	0	0	0	0	0	0	0
68	1	4	160	49.5	19.3359	29	4	100	6	10.8	26.3	15	29.7	8	2	2	0	0	0	0	0	0	0	0	2
69	1	4	146	49	22.9874	29	0	100	8	9	14.3	15		14	8	1	1	1	0	0	0	0	0	1	2
87	1	2	147	55.3	25.5912	18	0	30	2		7.53	50		13	8	4	0	1	0	0	0	0	0	1	3
84	1	0	136	37.8	20.4369	20	0	95	6	25.59	20.07	40		12	4	3	1	1	0	0	0	0	0	0	1
77	1	0	151.5	57.7	25.1391	21	0	95	6	16.98	13.7	0		14	3	2	1	1	0	0	0	0	0	0	2
78	1	2	144.8	45.1	21.51	23	0	100	5	12.32	15.8	15		13	1	1	0	1	0	0	0	0	0	0	1
78	1	2	156	64	26.2985	24	2	100	8	13.3	12.6	40	22	14		3	1	1	0	0	0	0	0	0
83	1	0	146	49.4	23.1751	22	1	85	2		16.8	65		11	7	4	1	1	0	0	0	0	0	0	2
65	1	2	153.9	51	21.5324	28	0	100	7	10	22.9	15		13	1	0	0	0	0	0	0	0	0	0	0
68	1	2	157.1	59	23.91	26	1	100	8	10.81	16.1	15	26	14	11	1	1	1	0	0	0	0	0	0	3
76	0	2	152	58	25.1039	29	4	85	2		15.93	90		10	10	4	1	1	0	1	0	0	0	0	1
69	1	3	153.5	66	28.01	30	1	100	7	11.5	20.8	15	24.5	14	2	1	1	1	0	0	0	0	0	0	2
65	1	2	158	60	24.0346	25	1	100	8	8.22	20.1	15		14	4	1	0	1	0	0	0	0	0	0	1
83	1	0	156	45	18.4911	9	1	55	0			50		10	7		0	1	0	0	0	1	1	0
83	1	0	157.7	85.5	34.3798	12	0	75	0		19.3	30		14	6	2	1	1	0	1	1	0	0	0	6
69	1	3	154	62	26.1427	29	0	100	8	5.37	16.6	0	28.5	14	3	3	0	1	0	0	1	0	0	0
75	1	0				12	0	100	7	8.2	23.3	0	21	13	1	1	0	1	0	0	0	1	0	0	1
67	1	3	159	52.5	20.7666	30	1	100	7	8.9	20.2	15	22	11	4	1	1	1	0	0	0	0	0	0	2
77	1	0	160	62	24.2188	14	5	85	2		6.6	40		7	17		0	0	0	0	0	1	0	0
81	1	0	158.3	71.4	28.4929	18	2	90	5	26.61	16.7	40	22.5	13	1	4	1	1	0	0	0	1	0	0	2
91	1	5	149.2	49.6	22.2815	25	0	65	2		7.4	25		11	6		0	0	0	0	1	0	0	0
72	1	0	151	59	25.8761	19		50	0		11.5	75		8	13	4	1	0	1	0	0	1	0	0	4
69	1	4	162.3	50	18.9816	27	1	100	8	6.2	23.1	15	24.5	11	3	0	1	1	0	0	0	0	0	0	2
83	1	3	150	44	19.5556	22	2	85	5		12.6	25		9	1		0	0	0	0	0	0	0	0
75	1	4	160.6	59.3	22.9913	27	4	100	8	9.92	24.7	15	26.1	13	0	0	0	0	0	0	0	0	0	0	1
72	1	4	145.6	51.1	24.1045	24	1	90	5	19.53	24.33	40	24.33	14	12	3	1	1	0	0	0	0	1	0	3
74	1	5	149	51.2	23.06	27	1	100	7	16.4	16.5	15	17.67	14	9	2	1	1	0	0	0	0	0	0	1
76	1	2	160.3	59.8	23.272	28	1	95	7	15.17	22.7	40	38	12		3	0	1	0	1	0	0	0	0	1
90	1	0	156.3	61.8	25.3	18	0	100	7	16.47	19.4	15	22	14	7	2	0	1	0	1	0	0	0	0	1
74	1	2				26	2	50	1		8.5	40		10	19	3	1	1	0	1	1	0	0	0	6
89	1	2	145.2	63.4	30.0716	12		70	0		11.5	40	11.5	11	2	4	0	1	0	0	0	1	0	0	3
73	1	3	152.9	57	24.3815	26	0	100	8	8.7	19.8	15	30	14	0	0	0	1	0	1	0	0	0	0	2
76	1	2	149	50	22.5215	23	1	95	6	17.44	15.4	40	26	13	6	5	0	1	0	0	0	1	0	0	8
76	1	0	165	63	23.1405		4	95	2			25		12	0	0	0	0	0	0	0	0	0	0
79	1	2	148	62.8	28.6706	17	3	70	1		10.4	40		13	7	4	1	1	0	0	1	0	0	0	5
69	1	2	140.8	51.7	26.0787	22	2	100	8	10.4	14	15	18	14	3	1	1	1	0	0	0	0	0	0	2
67	1	2	153	57.6	24.6059	26	4	100	8	12.62	20.3	15		14	6	4	1	0	0	0	0	0	0	0	4
65	1	2	147	54	24.9896	29	0	100	8	11.53	25.23	0	20.33	12	1	2	0	0	0	0	0	0	0	0	0
75	1	3	157	80	32.4557	21	1	95	6	13	20.4	15		14	11	3	1	1	1	1	1	1	0	0	3
70	1	2	154.8	50.4	21.03	28	1	100	7	16	16.43	15		11	2	2	1	0	0	0	0	0	0	0	1
79	1	0	144.5	71.1	34.0513	17	3	20	0		14.6	75		6	2	4	1	1	1	0	0	0	0	0	4
65	1	2	156.6	57.7	23.5284	24	1	100	8	13.41	16	15		14	0	2	0	0	0	1	0	1	0	0	1
83	0	5	169	68	23.8087	27	1	95	6	10.51	31.87	15	36	14	10	3	1	1	0	1	1	0	0	0	3
96	0	3	170	72	24.9135	16		75	0		20	50		12	13		1	0	0	0	1	0	0	0
84	0	2						5	0			30		3	5	4	0	1	0	0	0	1	0	0	2
69	0	3	168.2	76.5	27.0402	29	2	100	7	11.43	41.17	15		12	3	1	1	1	0	0	1	0	0	0	3
69	0	3	171	77	26.3329	29	1	95	7	12	45.6	15	20.83	14	4	1	1	1	0	0	0	0	0	0
71	0	3	169.6	68.4	23.7796	28	2	100	4	10.69	34.1	15	31.3	11	4	2	1	1	0	0	0	0	0	1	3
91	0	1	165	59	21.6713	20	0	100	1	7.56	19.8	30	31.33	13	10	1	1	1	0	1	1	0	0	0	2
89	0	4	170.5	76.5	26.3156	27	0	100	3	11.91	39.6	15	23	14	5	0	1	1	1	1	0	0	0	0	1
69	0	5	158.7	64.3	25.5304	30	0	100	6	7.68	29.5	15	24	14	2	0	1	1	0	0	0	0	0	0	2
84	0	2	161	56	21.6041	20	1	85	4		26.1	65		11	3	2	0	1	0	0	1	0	0	0	2
86	0	0						35	0		0	35		8	5	5	0	1	1	0	0	1	0	0	3
72	0	4	159	63.1	24.9595	26	0	100	6	9.59	29.5	15	20.5	14	4	0	1	1	0	1	0	0	0	0	3
85	0	1	163.4	62.6	23.45	19	5	100	7	18	28.33	25		13	2	1	1	0	0	0	0	0	0	0	0
69	0	5	172	76.8	25.96	30	0	100	8	4.29	44.4	15	39.5	14	2	0	0	0	0	1	1	0	0	0	3
72	0	5	167	60.5	21.6931	30	1	90	7	10.21	28.7	15		13	6	1	1	1	0	1	0	0	0	0	3
86	0	5	160.2	57.6	22.4439	15	1	65	0		20.2	40		13	11	4	1	1	0	1	1	0	0	1	5
69	0	4	159	63.7	25.1968	29	0	100	6	9.21	34.1	15	34.1	14	1	0	1	1	0	0	0	0	0	0	2
84	0	3				20	4	60	3		15.7	75		9	7	4	0	0	0	0	0	1	0	0	3
73	0	2	154.6	54.9	22.9696	29	0	95	7	12	28	15	28	11	6	0	0	0	0	0	1	0	0	0	4
71	0	2	165	63.1	23.1772	27	1	100	6	8.1	38.1	0	34.5	14	0	0	0	0	0	0	0	0	0	0	2
74	0	4	164.9	69.5	25.559	30	0	100	6	8.2	31.8	15		14	2	0	0	1	0	1	1	0	0	0	2
81	0	2	168.7	75.7	26.599		1	90	2	12.61	26.2	40		13	6	2	1	1	1	0	0	1	0	0	3
70	0	5	166.9	72.5	26.0271	30	0	100	8	8.9	34.1	15	32	14	5	0	0	0	0	0	0	0	0	0	1
67	0	5	160	65.7	25.6641	29	0	100	8	7.28	40	15	35	14	1	0	0	0	0	1	0	0	0	0	0
82	0	3	163	71	26.7229	24	0	100	5	10	15.9	15	17	14	9	2	1	1	1	0	1	0	0	1	3
82	0	4	165	61	22.4059	23	1	100	2	12		0		6	1		0	1	0	0	0	1	0	0
78	0	3	161	49	18.9036	26	0	95	8	11.97	30.6	15		9	5	1	0	0	0	0	0	0	0	0	3
76	0	5	164.3	60.4	22.3749	25	0	100	7	11.1	34	15	35	13	2	2	0	1	0	0	1	0	0	0	3
74	0	5	167	102	36.5736	30	2	90	4	10.38	40.37	15	21.33	14	6	3	1	1	0	0	1	0	0	0	3
84	0	5	158.9	54.7	21.27	30	1	100	8	14.05	11.17	15	19.77	13	11	3	1	1	1	1	0	0	0	0	2
86	0	1				25	2	95	8	42	16.5	55	17	14	9	4	1	1	0	0	0	0	0	0	3
91	0	1	146	45	20.8315	24	2	100	2	25	12.7	50		13	2	2	0	1	0	0	1	0	0	0	1
86	0	1	160	58.5	25.3447	23	4	90	5	25	18.57	40		11	6		1	1	0	1	0	0	0	1
87	0	2	159.6	66.3	26.0284	28	0	100	7	13.2	28.9	15	25	13	1	0	0	1	0	0	0	0	0	0	1
68	0	4	156.2	55.7	22.8293	28	3	100	8	9.8	26.8	15	25	13	4	0	0	1	1	0	0	0	0	0	2
72	0	2	167.3	81.8	29.2255	26	1	100	5	10.11	29.1	15		12	8	0	1	1	0	1	0	1	0	0	4
84	0	4	170.6	60.4	20.7529		1	80	1	14.62	25.1	40		9	9	3	0	1	0	1	0	1	0	0	3
82	1	2				20	1	85	3		21.2	50		12	3	4	0	0	0	0	0	0	0	0	3
95	0	1	157.5	61.5	24.7921	19	1	75	1		24.5	40		13	1	4	0	1	0	0	0	0	0	1	2
92	0	3	169.2	62.7	21.9011	22	1	80	5		26.2	40		10	14	3	0	1	0	0	0	0	0	0	2
88	0	4	158	67.1	26.8787	21	0	100	8	8.2	24.8	15	35	12	2	3	0	1	0	1	0	0	0	0	0
67	0	2	160.9	55.9	21.5923	20	1	100	5	9.61	26.2	15	35.5	10	0	0	1	0	0	0	0	0	0	0	2
67	0	3	160	68	26.5625	29	0	100	6	5.31	31.4	15	21	14	7	0	1	1	0	1	0	0	0	0	3
81	0	5	172.9	60.2	20.1375	27	2	100	6	13.79	30	0	23.8	9	0	2	0	0	0	0	0	0	0	0	0
85	0	2	167	61	21.8724	22	1	65	3	17	25	35		10	0	4	0	0	0	0	0	1	0	0
104	0	4				20	1	50	0		19.8	90		13	10	4	0	0	0	1	0	1	0	1	4
77	0	0				18	0	85	3		23.3	40		12	9	4	0	1	1	0	1	0	0	0	4
89	0	3	168.9	72.8	25.5195	15		50	0		23.4	40		14	11	3	0	1	0	0	0	0	1	0	4
90	0	3	163	73	27.4756	25	0	95	7	11.63	20.97	30		14	5	2	1	0	1	0	1	0	0	0
91	0	2	165	61	22.4059			0	0			55		7	1		0	0	0	0	0	1	0	0
70	0	2	155.9	59.6	24.5219	30	5	100	7	9.52	33.3	15	28.5	12	5	1	0	1	0	0	0	0	0	0	1
89	0	5	149	54	24.3232	30	1	100	8	15	24.3	55	18	14	4	3	0	0	0	1	0	0	0	0	0
86	0	5	170	77	26.6436	29	3	100	7	11	34.9	15	25.3	14	8	1	0	1	0	0	0	0	0	1	1
80	0	4	156.3	38.8	15.8823	21	4	100	4	16.75	16	40	24	7	1	5	0	0	0	0	0	1	0	0	1
82	0	3	165	63	23.1405	23	1	100	7	15.83	38.5	25	28.7	14		1	0	1	0	0	1	0	1	0	3
78	0	2	164	76	28.26	29	0	100	7	15	27.13	15	48.33	14	11	1	1	1	0	1	1	0	0	0	3
73	0	5	165.3	67.5	24.7035	28	0	95	4	15	22.27	15		14	12	0	1	1	0	1	1	0	0	0	2
72	0	2	154	59.5	25.0885	21	3	75	1		19.1	40		13	4		1	1	0	0	0	0	0	0
74	0	5	162	57	21.7193	29	0	100	6	10.7	25.1	15	25.1	13	11	2	1	1	1	0	0	1	0	0
86	0	5	155	73	30.385	28	0	100	3	11	25.8	15	19.6	14	6	3	0	1	0	0	1	0	0	0	3
73	0	5	164.5	70.2	25.9421	30	0	100	7	10.59	45.5	15	35	14	0	0	0	1	0	1	0	0	0	0	1
82	0	2	167.2	60.6	21.677	27	0	95	6	14	26.7	40	11.33	11	5	1	1	1	0	0	0	0	0	0	2
82	0	5	167	63	22.5896	27	1	100	5	8.63	30.13	15	15.67	13	7	2	1	1	0	0	1	0	0	0	3
93	0	2	152	41.4	17.919	14	3	85	4		13.7	80		5		5	0	0	0	1	0	0	0	0	1
78	0	2				21	0	85	6			65		12	8		1	1	0	0	1	0	0	0
78	0	2	156	68	27.9421	18	1	80	1	16.57	21.8	40		14	10	3	0	1	0	1	0	0	0	0	1
90	0	4	157	69.7	28.277	24	0	95	3	15.28	28.6	50		10	10	3	0	1	0	1	1	1	0	0	5
83	0	2	168	76	29.7296	10		5	0		12.3	50		11	11	4	0	0	0	1	1	1	0	1	4
85	0	5	167	62.5	22.4103	27	1	85	3	12	15.4	65		13	9	2	1	1	1	1	1	0	1	0	5
84	0	2	165	54	19.8347	26	0	75	3		13.6	75		11	6	4	1	0	0	1	0	0	0	0	2
88	0	4					1	35	0			40		10	3	5	0	1	0	0	0	1	0	0
86	0	3	167.8	78	27.702	19	0	60	1			70		14	6		1	0	0	0	0	0	0	0
76	0	2	168	75	26.5731	25	1	100	5	10.2	33.4	15	14	14	8	2	1	1	0	0	1	0	0	0	2
66	0	5	176	70.5	22.7596	28	1	100	6	8	34.23	15	20	13	10	1	1	0	0	0	1	0	0	1	3
84	0	4	161	67	25.8478	26	1	100	6	12	21.33	55	17	14	9	1	0	1	1	1	1	0	0	0	2
65	0	2	161	53	20.4467	27	2	100	5	8.12	35.9	40	33	12	5	0	1	0	0	1	1	1	0	0	1
78	0	0	169.9	100	34.6428	24	0	100	4	16.47	36.6	15	39.73	11	7	4	1	1	0	0	0	0	0	0	1
65	0	4	163	64	24.0882	27	0	100	5	12.7	39.6	15	27.5	14	5	2	1	0	0	0	0	0	0	0	1
75	0	2	171	82	28.0428	25	0	80	3	11	31.3	15		14	11	3	1	1	0	0	1	0	0	0	2
81	0	2	171	73	24.9649		0	100	5	9.69	34.8	15	32	14	9	0	0	1	0	0	0	0	0	0	1
88	0	2	166.3	49.8	18.0071	29	0	100	6	11.45	17.9	35	13	10	4	1	1	0	0	0	0	0	0	0	2
83	0	4	160.5	62.9	24.4175	12		20	0		9.6	40		11	9		0	0	0	0	0	1	0	0
89	0	4		66		18	1	60	0			35		10	3		0	0	0	0	0	1	1	0
81	0	1	163.2	64.2	24.1043	30	0	100	7	9.21	30.9	15	21	14	5	0	1	0	1	0	1	0	0	0	5
88	0	3	157.9	69.1	27.7149	21	4	100	4	23.72	23	15		14	14	4	1	1	0	1	0	0	0	0	3
65	0	3	173.3	71.9	23.9404	30	0	100	8	7	41.97	15		14	5	0	0	1	0	0	0	0	0	0	2
94	0	5	160	62.8	24.5312	20	1	65	0		24.7	50		13	4	4	0	0	0	0	1	0	0	0	2
80	0	0	156	60	24.6548	22	0	95	4	16.67	26.7	50		14	1	3	1	0	0	1	1	0	1	0	0
76	0	2	170	75.2	26.0208	22	1	100	6	15.2	31.5	15	21.17	13	6	2	0	1	1	1	1	1	0	0	4
74	0	2	164.5	64.4	23.7987	29	1	100	3	11.6	29	30		14	17	0	1	1	1	0	0	0	0	0	4
86	0	4	166	62.1	22.5359	26	0	100	3	8.75	30	15	21	13	1	0	0	0	0	0	0	1	0	0	1
73	0	1	178	82	25.8806	28	0	100	6	11.15	31.77	15	20	14	9	1	1	1	0	0	0	0	0	0	3
65	0	4	171.4	89.9	30.6012	28	0	100	8	9.5	32.8	15		14	10	1	1	1	0	0	0	0	0	0	2
64	0	5	164.4	54	19.9798	29	2	100	6	19.87	21.7	50		12	6	4	1	0	1	0	0	0	0	0	4
79	0	1				19	5	70	2		23.4	40		11	13		1	0	0	1	1	0	0	0
65	0	3	161	76	29.3199	29	0	100	6	9.43	37.4	15	27	14	5	0	1	0	0	0	0	0	0	0	7
67	0	2	166	70	25.4028	30	0	100	5	10.06	34.5	15	31.2	13	6	0	1	1	0	0	0	0	0	0	3
66	0	2	172	92	31.0979	26	0	100	6	10.81	45	15	32.8	9	8	1	1	0	0	0	0	0	0	0	7
76	0	5	162	55	20.9572	20	1	80	1	21.41	12.9	40	16.1	8		5	0	1	0	0	0	0	0	0	1
67	0	5	169.9	86.8	30.07	30	1	100	5	10.63	35.2	15	32	14	2	0	1	0	0	1	1	0	0	0	1
65	0	4	170.9	69	23.6246	26	0	100	6	8.4	37	15	22.8	14	4	0	0	1	0	1	1	0	0	0
66	0	4	172	70	23.6614	26	1	100	6	9.55	30.5	15	28.7	14	5	0	1	1	0	0	0	0	0	0	3
93	0	1	151	57	24.9989	10		45	1	85.27		50			9		0	1	0	0	0	0	0	1
88	0	3	164	66.7	24.7992	23	1	75	0	34.6	25.2	65		13	8	4	0	0	1	1	0	0	0	0	1
95	0	4	157.8	55.1	22.1278	22	0	90	6	12.27	18.1	55		13	4	1	0	0	0	1	1	0	0	0	0
92	0	5	158.6	72.1	28.6635	16	0	90	6	17.04	22.4	55		14		3	0	1	0	0	0	0	0	0	1
86	0	0				15	1	75	1		16.5	55		10	9		0	1	0	0	0	1	0	0
79	0	2	156.9	56.2	22.8292	15	4	75	0		19.4	50		8	11	4	0	1	0	0	1	0	1	0	1
84	0	2	169	83.6	29.2707	22	1	95	7	15.92	31.7	15	24.5	14	6	1	1	1	0	0	1	0	0	0	5
88	0	5				19	0	95	5			30		14	0	5	0	0	0	0	0	1	0	0	1
88	0	2						35	0		21.47	55		13	4	1	0	0	0	0	0	1	0	0	1
88	0	5	166	85	30.8463	26	2	85	1	25.14	20.6	40	19	13	1	4	0	0	0	0	0	1	0	0	1
81	0	4	171.7	74.5	25.2706	28	0	100	5	7.6	28.8	15	30	14	7	0	1	1	0	0	0	0	0	0	3
88	0	0				14	2	10	0		10.5	35		13	10		0	0	0	0	1	0	0	1
79	0	5	164.9	68.4	25.1544	27	1	100	8	6.35	47.2	15	34	14	0	0	0	0	0	0	0	0	0	0	1
69	0	2		59.9			0	100	4			25			4		1	0	0	0	0	0	0	0
69	0	2	164.2	68	25.221	26	0	95	5	16.4	22.6	15	30	10	4	3	1	1	0	0	0	0	0	0	2
71	0	3	161.1	63.5	24.4671	30	0	100	8	7.2	37	15	28	13	9	0	1	1	0	1	0	0	0	0	2
78	0	4	166	62.4	22.6448	30	1	70	5		37.8	40		12	13	3	1	1	0	1	0	0	1	0	3
86	0	2	159.9	54	21.1201	26	1	100	4	22.2	18.6	40		12	10	4	0	1	0	1	1	0	0	0	4
82	0	0	164.2	51.1	18.9529	14	1	85	4		27.9	15		11	1	0	0	0	0	0	0	0	0	1	1
72	0	5	179	78	24.3438	29	0	100	6		35.33	15		14	2	1	1	0	0	0	0	0	0	0	2
65	0	0	173	79	26.3958	22	0	95	1	18	33.4	35		14	4	3	1	1	0	0	1	0	0	0	2
72	0	2				16	0	45	0		27.67	40		12	3		0	1	1	1	1	0	0	0
70	0	2				26		60	1		26	35		8	13		1	0	0	1	1	0	0	0
72	0	3	169.5	72.9	25.374	28	0	100	6	8.09	38.5	15	34.37	14	2	0	1	1	0	0	0	0	0	0	2
73	0	2	174.9	96.4	31.5136	27	2	100	5	15.14	40.1	25	26.1	14	2	2	1	0	0	0	0	0	1	0	1
83	0	0	165	60	22.0386	19	1	95	1	24.58	20	25		12	6	5	1	1	0	1	0	1	1	0	3
99	0	2		66.7		10	1	45	0		13.1	40		11	10		1	0	0	1	1	0	0	0
84	1	1	175	64	20.898	22	1	100	7	10.25	39.53	15	21	12	5	0	1	0	0	0	1	0	0	0	1
65	0	3	162	74.8	28.5018	28	4	100	5	11.8	36.4	15	32.67	14	5	1	1	0	0	0	1	1	0	0	2
87	0	4	165	67.2	24.6832	14		25	0		10.9	15		11	1	4	0	1	0	0	0	1	0	0	2
86	0	5	167	90	32.28	26	2	75	3		26	40		14	7		0	1	0	0	0	0	0	0
80	0	2	150	46.3	20.5778	17	2	20	1		13.3	40		1	1	5	0	0	0	0	1	0	0	0	4
87	0	2	160.4	61.7	23.9815	14	1	100	2		16.2	15		14	5	2	0	0	0	0	0	1	0	0	1
80	0	3	164	53.8	20.37	12	1	100	8	10.86	24.03	15	21.33	11	6	2	0	1	0	0	1	0	0	0	1
83	0	2	162.1	76.5	29.1136	24	1	95	6	16.78	26.43	30	19.17	14	5	3	1	0	0	0	0	0	0	0
72	0	2	154.3	48.9	20.5389	29	0	100	7	13.99	30.5	15		12	6	0	1	1	0	1	0	0	0	0	3
79	0	0	167	70.8	25.3864	19	1	90	3	11.59	20.2	15		14	9	4	1	1	0	0	0	0	1	1	3
65	0	2	168	63	22.3214	16	2	100	6	7	23.4	15	18	14	4	4	1	1	0	0	1	0	0	0	3
68	0	2	161.1	63.6	24.5056	25	0	100	8	11.36	32.6	15	29.4	14	2	0	0	1	0	0	0	0	0	0	3
83	0	2				24	2	25	0			35		9	9	4	1	1	0	1	1	0	0	0	4
76	0	0	158.5	72.7	28.9385	21	1	90	6	11	23.17	25		12	11	4	1	1	0	1	1	0	0	0	2
65	0	2	163	87	32.7449	29	0	100	6	10.52	38.97	15	30	14	5	0	1	1	0	0	0	0	0	0	2
92	0	3	169.9	70	24.25	17	0	95	6	21	24.1	15		14	1	1	0	1	1	0	1	1	0	0	0
91	0	0				7		5	0		10.7	50		9	8	5	0	1	1	1	1	0	0	0	3
96	0	5	155	40.5	16.86	29	5	85	4		23.8	50		11	9		0	1	0	1	0	0	0	0
97	0	1	155	52	21.6441	9		65	1		15.53	50		11	5		0	1	0	0	0	0	0	0
91	0	0	172	66	22.3094	24	1	100	5	11	27.3	25	26	14	10	2	1	1	0	0	1	0	0	1	3
88	0	2	166	59.5	21.5924	19	0	100	6	22.2	20.07	40	6.83	11	4	3	1	1	0	0	0	0	0	0	3
69	0	2	150	58	25.7778	28	1	100	4	11.25	30.1	15		14	0	0	0	0	0	0	0	0	0	0	3
76	0	5	166.8	69.8	25.0878	29	0	100	8	7.4	37.5	15	26	14	4	0	0	1	0	1	1	0	0	0	2
67	0	5	173	75	25.0593	24	1	100	8	11.82	42.9	15	22.5	14	3	1	1	1	0	0	1	0	0	0	3
91	0	2	170.2	77.8	26.8572	27	1	85	5		26.9	65		12	7	1	0	1	1	0	0	0	0	0	3
78	0	4	174.1	71.3	23.523	29	0	90	7	9.87	32.7	15	30.2	14		1	0	1	0	0	0	0	0	0	1
83	0	5	156	64.4	26.4629	25	1	70	2		19.7	75		11	15	4	1	1	0	0	1	0	0	1	7
81	0	2	174.2	61.9	20.3983	26	0	100	4		31.1	15		12	8		1	1	0	1	1	0	0	0
84	0	4	172	75	25.3515	28	1	95	3	13.2	23.1	15	21	14	7	4	0	0	1	1	0	0	0	0	0
76	0	2	167	44	15.7768	23	0	85	1		17.5	15		10	13	2	0	0	0	0	0	0	0	0	3
73	0	2	166	64	23.2254	20	1	100	7	6.72	37.83	15	35.5	14	3	1	1	0	0	0	0	0	0	0	2
71	0	2	167.5	67.6	24.0945	29	3	100	7	11.8	38.8	15	34.07	13	2	1	0	0	0	0	1	0	0	0	0
65	0	2	174.7	80.8	26.4744	28	0	100	8	9	43.3	15	40	14	2	0	1	0	0	0	0	0	0	0	2
88	0	0	163.8	86.1	32.0904	18	1	85	2		20.7	50		12	11		1	1	1	0	1	0	0	0
75	0	2	167	79	28.3266	29	0	100	6	13.69	37.4	15	21	14	9	0	1	1	0	1	1	0	0	0	5
72	0	2	168.3	76	26.8315	18	0	100	6	15.38	38.8	15	29	14	6	0	1	1	0	1	0	0	0	0	4
76	0	2	163	49	18.4425	23	5	80	2	19.86	5.8	40		4	0	4	0	1	0	0	0	0	0	1
87	0	5	174	84	27.7447	28	3	100	3	13.5	28.5	40		12	1	2	1	0	0	1	0	0	0	0	1
75	0	2	157.8	71.1	28.5533	26	1	100	6	13.15	31.1	15	16.67	10	0	0	0	1	0	1	0	0	0	0	0
72	0	4	179	81	25.2801	27	2	100	7	13.3	35.6	15		13	10	2	1	1	1	0	0	0	0	0
68	0	2	165	70	25.7117	30	0	100	8	11.3	45.6	15	26.7	14	4	0	1	1	0	0	0	0	0	0	5
67	0	5	166	75	27.2173	28	0	100	6	7.86	30.67	15	30.67	14	7	0	1	0	0	0	0	0	0	1	1
78	0	2	175.3	67.7	22.0305	30	0	100	7	8.11	33.2	15	34	11	3	0	1	1	1	0	1	0	0	0	6
76	0	2	170.6	84.6	29.0678	22	1	95	1		31.8	40		13	8	2	0	0	1	0	0	1	0	0	3
85	0	3	155.7	45	18.56	25	2	90	8	12.979	22.33	15	22.33	8	1	1	0	1	1	1	0	0	0	1
83	0	2	172	78	26.3656	23	1	95	4			40		14	9		1	0	0	1	1	0	0	0
80	0	0	162.5	65.1	24.6533	13	4	85	3	19.84	33.7	50	28.3	13	6	2	0	1	0	0	0	0	0	0	3
88	0	5	168	61.1	21.6482	30	2	90	5	12.2	23.9	50	27	13	9	4	0	1	0	1	0	0	0	0	5
74	0	3	156	50	20.5457	30	0	100	7	11.77	27	0	20	12	2	2	1	0	0	0	0	0	0	0	1
94	0	5	158	63	25.2363	26	1	85	2	13.8	28.6	40		12	6	0	0	1	0	0	1	0	0	0	2
81	0	2	164.8	72.1	26.5473	27	0	95	8	9.81	30.8	15	28	14	3	0	0	1	0	0	1	0	0	0	1
67	0	3	161.2	61.9	23.821	27	0	95	5	8.14	34.1	15		12	3	1	1	0	0	0	0	0	0	0	3
80	0	4	163.7	55.6	20.7481	30	0	100	6	11.27	21.5	15	29	12	5	2	1	1	1	1	1	0	0	0
89	0	2	151.1	40	17.5199	16	1	75	0		16.8	50		8	15		0	1	1	1	1	0	0	1
69	0	5	165	67	24.6097	29	0	100	7	6.4	38.8	0	29	14	5	1	0	0	0	0	0	0	0	1	1
84	0	3	172	59.4	20.0784	22	5	65	1	48.9	10.7	75	12	7	2	5	0	0	0	0	0	0	0	0	1
74	0	4	158	62	24.8358	29	1	100	7	7.5	32.3	15	30	14	3	0	0	1	0	0	0	0	0	0	2
85	0	2	157	56	22.719			45	0		9.4	40		11	14	2	1	1	0	1	1	0	0	0	2
89	0	2						5	0		5.3	30		8	18		0	1	1	0	0	1	0	0
91	0	0	152.5	53.8	23.1336	15	1	85	0		20.9	75		14	3	3	0	0	0	0	0	1	0	0	1
78	0	2	160	74	28.9062	26	1	75	3	13.59	13.7	25		11	23	4	1	1	1	1	1	0	0	1	9
100	0	5	177.5	89.8	28.5023	30	0	80	5	10.23	28.7	30	30	14	5	2	1	1	0	1	1	0	0	1	3
95	0	1	165	57	20.9366	15	1	75	1	16	22.6	15		12	4	1	0	0	0	0	0	1	0	0	0
85	0	4	158	72.7	29.1219	19	1	85	2	16.76	17.27	80	7.67	12	6	3	0	1	0	0	0	1	0	0	2
95	0	3	157	69	27.993	15	4	25	1		26	35		7	6	4	0	1	1	0	0	1	0	0	3
94	0	3	161	61.2	23.6102	27	2	60	6		21.9	50		10	11	4	0	1	1	0	1	0	0	0	10
73	0	2	161	72.6	28.0082	28	1	95	5	11.95	24.9	15	23	14	9	1	1	0	1	0	0	1	0	0	5
80	0	2	160.7	73.6	28.5001	24	0	95	3	18.14	35.1	50		13	9	3	0	1	0	0	1	0	0	1	5
80	0	0	159	51.7	20.4501	13	1	100	1	12	20.4	40	18	11	3	3	0	0	1	1	0	1	0	0
67	0	4	160	60	23.4375	28	4	100	8	7.42	31.2	15	31	14	13	2	1	1	0	0	0	0	0	0	2
86	0	3	178.2	62.2	19.5873	21	1	95	2		30	40		9	5	2	1	0	0	0	0	0	0	1	3
70	0	2	166	81.8	29.685	30	1	100	4	14.73	45.17	15	33.5	14	8	2	1	1	1	1	0	0	0	1	3
74	0	4	157	44.5	18.0535	20	1	100	2	13.56	27.3	55	20.8	9	10	2	0	0	0	0	1	0	0	0	3
89	1	2	167.5	62.7	22.348	19	2	60	0		18.1	75		10	12		0	0	0	0	0	1	1	0
86	0	4	162	66.5	21.7503	13	0	50	2	25	18.9	65		13	3	2	0	1	0	0	0	1	0	0	2
88	0	4	162	73	27.8159	28	1	95	7	13	17.1	65		14	21	4	0	1	0	1	0	0	0	1	5
65	0	5	165.8	78.5	28.5562	30	1	100	8	7.58	39.83	15	24	14	5	0	1	1	0	0	1	0	0	0	2
66	0	4	164.5	79	29.9	30	0	100	8	8.2	48.2	15	32	14	0	0	0	0	0	0	1	0	0	1	1
85	0	4	163.3	72.5	27.1873	25	1	95	3	30.23	14.8	15	14.5	14	6	5	1	1	0	0	0	0	0	0	1
66	0	2	164	49	18.2183	19	2	75	1	10.59	28.5	40	13	10	12	0	0	1	0	0	0	0	1	0	3
95	1	0	151	50	21.9289	24	0	90	8	8	13.7	55	27	14	2	3	0	0	0	0	0	0	0	0	0
94	0	4		54.3		21	2	40	0		12.8	65		13	11	3	1	1	1	1	1	0	0	0	5
88	0	1	158.4	68.4	27.2612	26	1	85	5	17.6	22.5	40	23	14	7	3	0	1	1	1	1	0	1	0	1
90	0	2	168.5	74	26.0635	29	0	80	5		23.7	65		14	5		0	1	1	0	0	0	0	0
98	0	0				12		55	0		17.6	50		10	6	4	1	1	0	0	0	0	0	0	3
87	0	2	160.7	63	24.3954	24	1	95	7	6.95	34.9	15	17	14	10	2	1	1	0	0	0	0	0	1	4
91	0	3	171	80.5	27.5298	25	1	15	1		14.8	15		9	6	4	0	1	1	1	1	0	0	0	8
85	0	2				12		0	0		10	50		4	0		0	0	0	0	0	0	0	1
90	0	1	160.3	63.3	24.6341	20	4	95	7	20.71	30.97	25	18	14	5	3	0	0	0	0	0	0	0	0	1
89	0	1	162.3	63.7	24.1826	23	1	100	8		27.7	14	23	14	5	0	0	1	0	0	1	0	0	1	2
93	0	0	152.7	52.7	22.6013			85	0			40		13	7		0	0	0	1	0	0	0	0
84	0	4	161.5	66.2	25.3812	25	5	85	6	49	18.9	40		12	7	4	0	1	0	0	0	0	1	1	1
87	0	3	161	71	27.3909	16	1	70	1	24.61	19.3	50	16	10	3	4	0	0	0	0	0	1	0	0	1
94	0	3	159.5	63.6	24.9998	21	2	85	6		28.5	40		13	9	4	0	0	0	1	1	0	0	0	0
88	0	2	158.7	46.5	16.2	18	3	100	8	22	28.87	55		11	6	1	0	1	0	1	0	0	0	0	3
85	0	2				19	1	30	1		16.2	65		6	4		0	1	0	0	0	0	0	0
94	0	2	148.9	50.8	22.9126	27	1	90	4	12	22	30	30	12	8	4	0	1	0	1	1	0	0	0	2
85	0	4					2	100	2	11.21	26.7	30	14	14	14	1	0	1	0	1	1	1	0	0	4
84	0	3	160	56.9	22.2266	26	0	100	3	12.28	23.7	25	16	13	9	3	1	1	1	0	1	1	0	1	6
70	0	3	158	61	24.4352	28	0	100	6	9.9	24.87	15	28.33	14	6	1	1	1	0	0	0	0	0	0	3
65	0	4	164	85	31.6032	30	1	100	6	7.22	29.7	15		14	2	0	1	0	0	0	0	0	0	0	2
82	0	5	162	75.7	28.8447	27	2	95	5	11.84	30.7	25	33	14	5	1	1	0	0	0	0	0	0	0	1
76	0	5	169	60	21.0077	29	0	100	6	10.08	28.2	15	37	13	7	0	1	1	0	1	0	0	0	0	4
81	0	4	160.7	60.6	23.4661	19	0	100	2	16.92	18.6	15	27.6	9	6	5	1	1	0	0	0	0	0	0	3
80	0	5	168	61	21.6128	25	3	70	2	31	17.47	65		10	18	5	0	1	1	0	0	0	1	0	3
76	0	3	162	68	25.9107	27	0	100	7		40.1	15	21	14	0	0	0	0	0	0	1	0	0	0	1
70	0	3				25	1	100	7	7.68	36.9	15	19	14	0	0	1	1	0	0	0	1	0	0	3
65	0	5	169	71	24.8591	30	0	100	8	10.31	29.6	25	21.5	14	9	2	1	1	0	1	1	0	0	0	7
86	0	1	164	40	22.31	24	0	95	7	16	29.43	15		12	9	3	0	1	0	1	0	0	0	0	2
89	0	1	151.3	64.9	28.3509	20	0	55	5		16.4	50		14	11	4	0	1	0	1	0	0	1	0	2
96	0	5	155	50.8	21.1446	20	1	70	1		20.5	65		10	2	4	0	1	0	0	0	1	0	0	1
65	0	2	160	51	19.9219	27	1	95	5	9.68	34.5	15	24	12	18	0	1	1	1	0	1	0	0	0	10
86	0	2	153.4	51.2	21.758	17	4	85	2	20.29	13.4	40		9	2	4	0	0	0	1	1	1	0	0	4
71	1	5	179.5	80.4	25.39	30	0	100	8		33.5	15	31	14	2	0	0	0	0	0	0	0	0	0	0
81	0	5	174	82	27.0842	29	3	95	7	10.84	39.6	15	23.9	14	5	0	0	1	0	0	1	0	0	0	2
77	0	2	166	69	25.0399	18	0	95	5	10.08	28.37	25		14	6	2	1	1	1	0	0	0	0	0	5
87	0	3	163	65	24.4646	24	1	95	4	12.38	30.3	15	22.2	14	5	0	1	1	0	1	1	0	0	0	6
76	0	0	156.6	65.9	26.8721	12	0	90	3	14.56	24.8	15		14	9	2	1	1	1	0	1	0	0	0	3
85	0	5	162.5	62.5	23.6686	27	0	100	5	14	23	15	17	13	4	2	0	1	0	1	0	0	0	1	1
87	0	2				17		30	0		16.4	35		10	3		0	0	0	1	1	1	1	0
75	0	2	170.4	69.3	23.8668	29	0	85	3		36.5	40		14	9	2	1	1	0	0	1	0	1	0
75	0	2	162.6	68	25.7198	21	2	90	3	21.3	16.7	25		14	7	3	1	1	1	0	0	0	0	0	2
95	0	2	162.7	72.7	27.4637	29	0	100	6		29.6	15	19.6	14	21	0	0	1	1	1	0	0	0	0	3
75	0	2				14	0	35	0		15.8	75		11	5		0	0	0	0	1	0	0	0
78	0	3	157.5	55.9	22.5346	29	2	95	4	8	20.7	15		13	5	0	0	0	0	0	0	0	0	1	1
90	0	4						25	0		15.1	35		12	9		0	1	1	1	1	0	0	0
90	0	3	160	70	27.3438	20	1	95	5	10	13.73	50		14	6	2	0	1	0	0	0	1	0	1
88	0	4	169	71	24.8591	27	0	90	1	28		30		13	6		1	1	0	0	1	0	1	0
84	1	3	172.7	64.6	21.6595	25	2	65	2		25.5	55		9	11		1	1	1	1	1	0	0	0
88	0	0	161	64	24.6904	30	2	100	8	20	31.4	40	26.2	14	3	3	1	1	0	1	1	0	0	0	0
73	0	5	162.5	59.5	22.5325	29	1	90	7		33.47	50		13	7	2	1	1	0	0	0	0	0	0	3
80	0	2	161.2	63.6	24.4752	11	1	25	0		19.7	30		6	0	4	1	1	0	0	0	0	0	0	2
67	0	4	162.5	55.3	20.942	30	0	100	8	9.72	40.7	15	36	12	4	0	1	1	0	1	0	0	0	0	3
88	0	3	155	54	22.4766		2	95	2		28.3	40		13	5		0	0	1	0	1	0	0	0
97	0	3	177	64	20.4284	17	1	100	1	24.13	21.5	65		12	2	2	0	1	0	0	1	1	0	0	2
87	0	4	165	74	27.1809	28	0	100	6	16	32.3	15	12.3	14	9	3	0	1	0	0	1	0	0	0
87	0	0				14		5	0		5.7	55		10	4		0	1	0	0	1	0	0	0
67	0	4	160	63	24.6094	30	0	100	5	11	21.7	15	22	13	6	1	1	1	1	0	1	0	0	1	1
85	0	2	172.7	64.89	21.22	25	4	90	6	22	27.73	15		13	7	1	0	1	0	1	1	1	0	0	4
81	0	0	164	70.1	26.0634	20	4	50	2		23.7	75		11		4	1	1	0	0	1	0	0	0	3
68	0	0	166.8	76.7	27.5679	23	0	100	8	9.94	43.4	15	26	14	6	0	1	1	0	0	1	0	0	0	2
87	0	3	162	40	15.2416	10	5	0	0		11	35		4	2	5	0	0	0	0	0	1	0	0	2
73	0	2	168	50	17.7154	10		25	1		11.8	75		3	0		1	1	0	0	0	1	0	0
83	0	2	166	82	29.7576	19	2	80	1		22	40		12	13	4	1	1	0	1	1	0	0	0	7
83	0	2				2		30	0			80		9	11		1	1	1	0	0	0	0	0
78	0	2	163.588	88	32.8836	21	0	100	6	13.66	32.9	15	23	14	8	0	0	1	0	0	0	0	0	0	2
80	0	0	171.5	84.9	28.93	25	0	100	8	12		30		12	7		0	1	0	1	1	0	0	0
76	1	3	154	56	23.6128	24	1	95	5	11.33	23.1	15	24	14	7	2	1	1	0	0	0	0	0	0	2
79	0	3	157.5	44.7	18.0197	26	0	100	8	9.65	31.5	15	38.23	9		0	0	0	0	0	0	0	0	0	0
89	0	2	152.3	49.6	21.3837	20	0	100	5	23.17	25.3	30		13	7	3	0	1	1	0	1	0	0	0	5
87	0	2				10	2	30	0			50		11	2		0	0	0	0	0	0	0	0
74	0	2	166.5	79.4	28.6413	25	0	100	7	13.13	21.8	15	18	12	4	3	0	1	0	0	0	0	0	0	1
75	0	2	163.9	63.3	23.5638	20	1	90	2		23.5	15		11	8	4	0	1	1	0	0	1	0	0	3
81	0	2	156	59.8	24.5726	20	0	95	3	10.78	31.4	40		14	9	1	0	0	0	0	0	0	0	1	2
65	0	2	160.4	65.5	25.4585	29	2	100	6	9.28	38.6	15	30	14	7	2	1	0	0	0	0	1	0	0	6
68	0	2	177	66.7	21.2902	29	0	100	5	12	38.9	15		13	5	1	1	1	0	0	0	0	0	0	3
72	0	2	160	74.3	29.0234	27	0	100	6	9.55	25.53	15	26.83	14	6	1	1	1	0	0	0	0	0	0	3
77	0	2	164	61	22.68	14	2	90	2	15.22	24.3	40		11	8	4	1	1	0	0	0	1	0	0	6
84	0	0		61		14	1	90	3	15.14	33.4	40		12	4	4	0	1	0	0	1	1	0	0	3
69	0	2	164.8	88.8	32.6963	27	1	100	4	11.14	34.1	15	28.6	12	9	1	0	1	1	1	1	0	0	0	6
81	0	5	160.8	80	30.9398	18	3	50	0			50		12	10		1	1	1	0	1	1	0	0
72	0	0	177	82	26.1738	24	1	95	6	15.05	45.7	50	34.1	10	15	2	1	1	0	1	0	0	0	1	4
87	0	2	172.6	72	24.1686	25	0	90	4	17.26	31.2	15		14	6	1	1	1	0	1	0	0	0	0	2
68	0	2	170	90	31.1419	25	0	100	6	9.72	35.6	15	25	14	7	0	1	0	1	0	1	0	0	0	5
75	0	3	159.4	63.6	25.0311	22	0	100	5	14.31	26.9	15	20.3	14	1	3	0	1	0	0	1	0	0	0	4
66	0	2	159	52.5	20.7666	16	0	100	6	11.09	30.3	15	30	9	2	0	0	1	0	0	0	1	0	0	2
95	0	2	159	45	17.7999	22	1	90	2		19.7	10		9	3	3	0	0	0	0	0	0	0	0
78	0	2	167	70.3	25.2071	28	0	100	6	14.18	25.5	15	35.7	12	7	1	1	1	0	0	1	0	0	0	6
80	0	2	161	48	18.5178	25	1	95	6	14.91	13	40	29.5	7	0	5	0	0	0	0	0	0	0	0
69	0	5	176	53	17.11	25	4	100	7	12.7	34	25	34.4	9	0	3	0	0	0	0	0	0	0	0	0
78	0	2	160.2	67.3	26.2235	28	3	100	7	10.28	32.33	40	21.3	12	10	1	0	1	0	0	0	0	0	0	1
82	0	3	167.2	68.3	24.4314	27	0	100	7	11.36	32.6	15	27	14	11	2	0	1	0	0	0	0	0	0	1
71	0	5	150	63.9	28.4	21	2	95	1	8.06	23.2	40	18	11	9	4	0	1	1	0	0	1	0	0	1
83	0	2	166.4	70.9	25.6059	17	1	80	1		29.5	40		14	19		1	1	0	1	1	0	0	1
80	0		165.7	64.9	23.6374	26		100	6			15		13	7		1	1	0	0	0	0	0	0
83	0	2	158.5	62.2	24.7589	29	5	100	8	12	27.3	30	13.6	11	6	3	0	0	0	1	0	0	0	0	2
79	0	5	166.2	57	20.6354	27	0	100	6	11	34.2	15	16.3	12	2	2	0	0	0	1	0	0	0	1	1
85	0	5	160	62	24.2188	24	0	100	3	24.08	19.53	30		14	7	3	1	1	0	0	0	0	0	0	3
87	0	2	161	57.6	22.2214	21	1	80	0	27	23	40		9	9	2	0	1	1	0	1	0	0	1	2
90	0	3	169	59	20.6575	23	0	85	4		17	40		12	12	3	1	0	1	0	1	0	0	0	5
86	0	2	162.5	67	25.3728	25	0	100	7	7.89	29.9	25	24.7	14	8	0	0	1	0	0	0	0	0	0	2
93	0	4				22	2	60	0		12.6	35		10	5		0	0	0	1	0	0	0	0
72	0	4	166.7	54	19.4322	30	0	100	6	9.6	29.5	15	30	12	0	0	1	1	0	0	0	0	0	0	2
91	0	5	160.1	45.4	17.7122	27	0	100	6	10.47	33.4	15	30.9	11	7	0	0	0	0	0	1	0	0	0	1
68	0	4	162.4	66	25.0249	24	0	100	5	7.78	33.7	15	36	14	4	0	1	1	0	0	1	0	0	0	3
74	0	3	160.2	65.8	25.639	27	2	100	8	11.68	37.3	15	18	14	0	0	0	0	1	0	0	0	0	0	1
69	0	5	164.1	71.9	26.7	29	0	100	8	9.58	29.3	40	35.5	14	4	1	1	1	0	0	0	0	0	0	7
83	0	2	162	62.7	23.8912	19	4	100	5	16.5	21.1	15	16.3	11	6	3	1	1	0	0	1	1	0	0
91	0	2	163	59	22.2063	12	3	95	0		6.8	25		9	14	4	0	1	0	0	0	0	1	0	4
81	0	2	155.7	68.4	28.2149	20	2	100	5	10.5	38.3	25	31.5	11	0	2	0	0	0	0	0	0	0	0	1
88	0	3		39.7		13	1	85	0		13.8	55		8	3	3	0	1	0	0	0	0	0	0	2
77	0	0	158.2	73.9	29.5278	22	0	90	4	13.36	37.9	65		14	6	1	0	1	0	0	1	0	0	0	3
86	0	2	163	74	27.852	25	0	95	6	45.85	16.83	30	23.33	12	9	3	1	1	0	1	1	1	0	0	2
85	0	3	166.9	69.3	24.8783	28	0	100	3	11	26.3	15	14	14	6	2	0	1	0	1	1	0	0	0	3
80	0	5	167	69.4	24.8844	28	1	100	8	11.51	32.8	15	33.3	14	6	0	0	1	1	1	0	0	0	0	3
86	0	0	158	70	28.0404	19	1	55	1		20.93	50		14	6		0	1	0	0	0	0	0	0
83	0	3	167	67.6	24.2389	29	0	100	8	10	28.37	15	24	14	5	0	1	1	0	0	0	0	0	0	2
90	0	3	158.3	65	25.9389	26	1	80	6	29.27	19.93	50	16	14	9	4	0	1	0	1	0	0	1	0	1
87	0	3	173	73	24.3911	25	1	60	1		14.3	35		14	7		0	0	0	1	1	0	0	0
84	0	4	155	66.5	27.6795	26	0	85	7	18	36.27	15	25.67	14	1	2	0	1	0	1	0	0	0	0	1
85	0	1	158	58	23.2335		2	95	6	13.78	20.6	40	31	12	3	3	0	0	1	0	0	1	0	0	2
84	0	1	160	55	21.4844	28	2	95	8	9.57	26.5	0	28.5	11	3	0	0	0	0	0	0	0	0	0
77	0	3	159	76	30.0621	28	0	90	7	12.3	34.8	15	31	14	9	0	1	0	0	0	0	0	0	0	4
82	1	2	156	58	23.833	21	1	85	1	36.04	10.47	40		14	6	4	1	1	0	0	0	0	0	0	2
78	1	2		67		22	2	55	3		17.8	35		4	13	4	1	1	0	0	0	0	0	0	6
76	1	4	149	61.9	27.8816	29	1	65	2	24.61	18.7	35		14	7	2	1	1	0	1	0	0	0	0	5
74	1	5	160	53	20.7031	27	0	100	7	10.63	22.5	40	27	12	0	0	0	0	0	0	0	1	0	0	1
76	1	2	149	64.5	29.0527	24	0	95	1	19	7.7	15	15	13	11	3	1	1	1	0	0	1	1	0	2
82	1	5	159.5	60	23.5847	29	0	90	8	10.94	28.7	25	38.7	14	13	1	0	1	0	1	1	0	0	0
71	1	2	159	60	23.7332	30	0	100	8	10.1	20.8	15	28.5	14	1	0	0	1	0	1	1	0	0	0	2
77	1	0	160	53	20.7031	10	4	65	0		5.5	40		4	2	4	1	0	0	0	1	1	0	0	4
67	1	5	154	54	22.7694	29	1	100	8	8.97	15	15	35	14	6	2	1	0	0	0	0	0	0	0	1
65	1	4	154.7	70	29.2494	30	0	100	8	10.9	13.1	15	22.3	14	6	3	1	1	0	1	0	0	0	0	3
79	1	0	154.8	65.3	27.2503	9	1	25	1		10.5	65		11	4	3	0	1	0	0	0	0	0	0	2
67	1	3	152.9	51.8	22.1572	30	4	100	7	9.21	15.6	15	20	13	0	2	0	0	0	0	0	0	0	0	1
85	1					13	4	5	0		6.87	25		9	2		0	0	0	0	0	1	0	0
91	1	0	155	62.1	25.8481	15	3	60	1		17.8	55		10	12	4	1	1	0	0	0	0	0	0	2
73	1	2	133.1	40	22.579	21	0	90	2	15.24	10.1	55	18.6	10	4	2	1	1	0	0	0	1	0	0	3
72	1	2	163	90	33.8741	25	0	95	5	10.2	17.37	15	27	14	9	3	1	1	0	0	0	0	0	0	3
72	1	2	157.5	64.7	26.0821	28	1	100	8	9.14	21.1	40	25	14	7	0	1	0	0	0	0	0	0	0	2
70	1	2	155.3	51.1	21.1874	27	5	100	6	10.37	15.8	15	32.5	9		3	0	0	0	0	0	0	0	0	0
73	1	3	153.5	69.2	29.369	27	2	95	5		20.6	40		14	6	3	1	0	0	0	0	0	0	0	2
68	1	4	159	72	28.4799	28	0	100	7	11.22	22.1	15	22.5	14	7	2	1	1	0	0	1	0	0	0	2
83	1	0	153.6	64	27.1267	12	1	90	2	15.29	12	25		14	5	3	1	1	0	0	0	1	1	0	4
78	1	0	155	999		18	3	35	1			35		8	8		1	1	0	1	0	0	1	0
78	1	5	163.8	61.2	22.8099	28	1	90	5	12.87	15.4	50	23.6	13	0	3	0	0	0	1	0	0	0	0	0
88	1	2	151	49.6	21.7534	24	1	85	5	16.42	20	65		13	11	1	0	1	0	1	0	0	0	0	2
72	1	3	149.8	56	24.9554	30	0	100	8	14.36	20	15		14	0	0	0	0	0	0	0	0	0	0	1
70	1	3	158.8	57.3	22.7224	30	2	100	8	9.55	22.9	15	21.8	13	4	0	1	0	0	0	0	0	0	0	1
72	1	5	152.9	55.18	23.603	30	0	100	7	12.25	19.4	15	19	13	3	0	0	0	0	1	1	0	0	0	3
80	1	2				29	0	100	4	11.93	20.4	15	18	14	7	2	1	1	0	0	1	0	0	0	3
79	1	2				15		70	0	27	9.8	45		7	3	4	0	0	0	0	0	1	0	0	1
78	1	0	145.6	64.9	30.6141	14	2	70	2		14.1	40		9	12	5	0	1	0	1	0	0	0	0	4
82	1	0	148	42	19.1746	14	1	35	1		8.8	35		11	14	2	1	1	0	0	1	1	1	0	5
69	1	3	152.5	57.9	24.8965	27	0	100	8	6.71	22	15	16	14	9	0	1	1	0	0	0	0	0	0	3
84	1	3	159.7	63.3	24.8195	27	2	100	6	5.98	13.5	15	20	14	4	1	0	1	1	0	0	0	0	0	3
81	1	2				21	0	75	1								1	0	0	0	0	0	0	0
67	1	5	150	51	22.6667	30	0	95	8	16	20.6	40	20	14	3	4	1	1	0	0	0	0	0	0	2
89	1	2	132.1	44.2	25.3289	10		45	0			50		10	8		1	1	1	0	0	1	0	0
71	1	3	148.2	58.3	26.5444	21	1	100	5	16.48	15.8	25	22.53	14	9	4	1	1	0	1	1	0	0	0	5
84	1	2	148.9	62.1	28.0093	15	4	85	3		14.8	15		11	9		1	1	0	1	1	0	0	0
69	1	4	166	63.9	23.1891	30	2	100	8	11.8	20.8	15	25.5	14	5	0	1	0	0	0	1	0	0	0	3
79	0	2	160	68	26.5625	18		5	0		7.2	50		7	23	4	1	1	0	1	1	1	0	0	5
76	1	2	147	43	19.8991	30	2	100	7	12	15.5	55	31	12	3	3	0	1	0	0	0	0	0	0	1
83	1	2	140.6	64.5	32.6279	28	0	100	4		17.4	30		14	2	2	0	1	1	1	0	0	0	0	3
69	1	5	156	53	21.7784	30	0	100	8	7.88	18.8	15	21	13	7	0	0	0	0	0	0	0	0	0	1
65	1	4	155.4	67.2	27.8271	28	4	95	5	17.76	14.4	30		12	1	4	1	1	0	0	0	0	0	0	4
71	1	3	151	48	21.05	28	0	100	8	12	19.93	15	42.33	13	3	0	1	0	0	0	1	0	0	0	4
67	1	2	150.4	82.8	36.6045	29	0	65	5	19.59	18	15	28	14	4	1	0	0	0	0	1	0	0	0	2
64	1	3	162.9	67.2	25.3237	29	2	100	8	11.68	10.8	15	25.7	14	3	2	1	0	0	0	0	0	0	0	3
87	1	2	148.1	47.9	21.8386	24	1	80	2		9.8	50		13	10	4	0	1	0	0	0	0	0	0	3
70	1	2	148.5	72.3	32.7858	20	1	100	8	12.75	19.9	40	26.2	14		0	0	1	0	0	0	0	1	0	1
72	1	2	146.7	54.6	25.3707	26	1	100	8	4.46	17.3	15		14	5	2	1	1	0	0	0	0	0	0	3
78	1	0	145.6	56.8	26.7933	15	2	100	5	17.25	17.7	25		13	10	2	0	1	0	0	0	1	0	0	4
80	1	2	161.7	62.1	23.7504	28	0	100	7	10.66	21.9	15	28.2	14	8	0	1	0	0	0	1	0	0	0	1
74	1	2	154	56.5	23.8236	24	3	95	8	9.06	22.6	0	21.5	12	0	2	0	0	0	1	0	0	0	0	2
72	1	1	150.5	63.3	27.9467	22	1	95	7	6.82	14.7	15		14	5	3	1	1	0	1	0	1	0	0	3
75	1	2	156	45	18.4911	19	1	100	6	10	16.3	15	28	9	2	2	1	0	0	0	0	1	0	0	4
95	1	0	145.7	53.8	25.3433	10	1	55	0		11.7	40		11	10		0	1	0	1	0	1	0	1
77	1	3	151.7	39.8	17.2947	22	2	100	2	12.82	14.5	40	12	9	3	4	0	0	0	0	1	1	0	0	3
68	1	3	162.6	63.5	24.0178	23	0	100	8	8.22	32.8	0	22	14	0	0	0	1	0	0	0	0	0	0	1
77	1	0	154	71	29.94	15	2	75	2		13.5	65		14	17	3	0	1	0	1	1	1	0	0	3
78	0	2	158	70.8	28.3608	19	1	90	4	21.53	16	25	12	12	3	4	0	0	0	0	0	0	0	0	2
67	1	4				27	0	100	8	11	17.9	15	26	14	5	1	1	1	0	0	0	0	0	0	2
76	1	5	146.3	47.4	22.1457	24	3	90	6		11.9	65		9	1	4	0	1	1	1	1	0	0	0	3
87	1	2	141.4	48.5	24.2573	16	1	100	3	16.3	21.2	40	9.3	13	5	4	0	0	0	0	1	1	0	0	3
90	1	3	149.4	49.3	22.0875	23	1	95	3	12.12	15.3	15		13	13	0	0	1	0	0	0	0	0	0	1
76	1	0	147	48.4	22.3981	12	2	75	5	32.93	14.1	95		13	11	4	1	1	0	1	0	0	0	0
71	1	2	150	52	23.1111	28	1	100	8		17.4	25		14	3	3	1	1	0	1	0	0	0	0	3
73	0	2	146	43	20.1726	30	0	100	8	8.06	13.7	10		12	0	2	0	1	0	0	0	0	0	0	1
69	1	3	149	50.6	22.7918	30	0	100	7	8.12	6.17	15		13	0	1	1	0	0	0	0	0	0	0
66	1	5	150.3	49.6	21.9565	30	1	100	8	11.13	15.06	15	25	13	7	0	1	1	0	0	0	0	0	0	2
89	1	2	137.1	41.5	22.0787	23	0	100	6	9.81	12.1	40	24.4	13	4	1	0	1	0	0	0	0	0	1	2
80	1	0	157.3	60.5	24.4511	23	0	95	7	16.51	23.2	40	17.5	12	3	3	0	1	0	0	0	1	0	0	2
81	0	1	154	49.5	20.872	14		90	2		16.2	15		12	5		1	1	0	0	1	0	0	0
82	1	0	149	47.5	21.3954	11	2	80	4	16.69	12.5	65		9	8	3	1	0	1	0	0	0	0	0	3
70	1	2	152.5	56.3	24.2085	27	0	100	8	12.16	20.9	15	27	12		1	0	1	0	0	0	0	0	0	3
81	1	0	153	81.1	34.6448	18	1	85	5	22.64	10.5	40		14	0	4	0	0	0	0	0	0	0	0	0
74	1	5	153.6	60.5	25.6432	29	0	100	8	9.81	17.7	15	24	14	6	1	1	1	0	0	1	0	0	0	3
79	1	3	154.2	64.9	27.2946	22	2	95	4	21.79	18.3	40	29.5	13	7	3	1	1	0	0	1	1	0	0	1
81	1	1	152	55	23.8054	16	2	50	0		12.5	50		11	18	4	0	0	1	1	1	0	0	0	3
74	1	2	158.5	65.8	26.1919	25	4	100	8	10	15	0	16.3	9	0	5	0	1	0	0	0	1	0	0	1
78	1	2	149	45.9	20.6747	16	4	85	5	12.11	6.1	25	23	10	11	4	1	1	0	0	1	0	0	0	5
78	1	2	157	77	31.2386	25	1	95	5	19.47	14.7	15		14	5	4	1	1	1	1	0	1	1	0	4
84	1	2	145.5	55.6	26.2633	20	2	95	4		15.4	40		14	8	3	0	1	1	0	0	1	0	0	4
73	1	2	157	55	22.3133	23	1	70	1		17.4	40		8		5	0	1	0	0	1	1	0	0	5
86	1	2	145.6	43.7	20.6138	16	2	95	3	14.14	14.8	65		11	11	4	0	0	0	1	0	1	0	0	3
66	1	5	156	58	23.833	30	0	100	8		16.9	15		12	1		1	0	0	1	1	0	0	0
82	1	0	152.6	53.2	22.8456	28	0	90	5	14.25	13.7	40		13	1	1	0	0	0	0	1	0	0	0	2
82	1	2				6	4	55	1		8.5	65		9	4	4	1	1	0	0	1	1	0	0	2
75	1	2	162	57	21.7193	25	0	95	8	11	13.4	25	25	13	5	4	0	1	0	1	0	0	0	0	1
82	1	3	156	44.3	18.2035		0	100	3	15.02	19.7	15	19.7	10	2	0	0	0	0	0	0	1	0	0	2
84	1	2	158	67	26.8386	26	1	30	1		16	60		9	12		1	1	0	1	0	0	0	0
75	1	2				19	3	5	0		6.3	15		9	5	4	0	1	1	1	0	0	1	1	5
85	1	5	151	54	23.6832	28	1	65	1		18.8	50		13	1	3	1	1	0	0	0	0	0	0	3
79	1	2	147.1	51	23.5692	13	3	85	1	17.34	19.8	55	14	14	11	2	1	1	1	1	1	1	0	0	7
86	1	2				16	0	45	1		7.5	25		5	11	4	1	0	0	0	0	0	0	0	2
79	1	0				18		15	1		7.1	15		12	12	4	1	0	0	0	1	0	0	0	5
86	1	2	153.3	43.5	18.5099	28	1	60	2	32		75		9	11		0	1	0	0	0	1	0	0
85	1	0	150	59.4	26.4	18	3	95	6	20.57	12	15	15	14	5	4	1	1	0	0	0	1	0	0	2
73	1	5	157	62	25.1532	30	0	95	8	8.8	19.23	15	22.67	14	7	1	1	1	0	0	0	0	0	0	1
69	1	2				23	0	80	5			40		14	8		1	1	0	1	0	0	0	0
86	1	0	148.9	72.2	32.5648	11	1	85	3		17.6	65		14	7	3	1	0	0	0	0	1	0	0	2
87	1	0	143.9	52	14.55	13	1	70	1			65		13	7		0	1	1	1	1	1	0	0
69	1	4	155.7	42.1	17.3662	28	0	100	8	9.27	29.8	0	27	10	1	0	0	0	0	0	0	0	0	0	0
71	1	2	154.5	59	24.717	22	0	100	8	9.85	15.1	15	14.67	14	1	3	1	1	0	0	0	0	0	0	2
75	1	2	145.9	44	20.6701	29	0	100	5	8.96	18	15	24	12	2	0	1	0	0	0	0	0	0	0	3
87	1	4		61		29	0	85	5		13.23	60		13	5		0	1	0	0	0	0	0	0
74	1	5	153.3	77.7	33.0626	29	0	100	8	9.12	18.35	15	22	14	3	0	1	1	0	0	1	0	0	0	3
88	1	2	145.9	58.5	27.4818	14	2	90	4	18.2	15.9	40		13	8	3	0	1	0	0	0	0	0	1	2
86	1	1	145.7	55	25.9086	22	0	95	8	20	11.57	40		14	11	3	1	1	1	0	0	0	0	0	3
68	1	5	155.6	72.5	29.9446	30	2	100	8	12.65	15	40	25.2	14	8	1	1	1	0	1	0	0	0	0	3
74	1	0	143.1	45.9	22.4147	15	0	100	7	11.03	19.7	15	15	13	2	0	0	1	0	1	0	0	0	0	2
68	1	2	153	65	27.7671	30	0	100	8	9.27	24.2	0	19.3	14	1	0	0	0	0	0	0	0	0	0	0
84	1	2				24	0	80	2		10.4	75		11	11	3	0	1	1	0	0	0	0	0
79	1	0				18	1	80	2		16.6	40		13	2	5	0	0	0	0	0	0	0	0	1
77	1	0	153	69.2	29.5613	25	0	95	7	9.27	23.9	15	25	12	6	0	1	0	0	0	0	0	0	0	2
74	1	0				18	0	100	4	13.94	16.4	15	6.5	14	4	3	1	0	0	0	0	0	0	0	2
81	1	0	146	67.8	31.8071		5	15	1		8.1	15		6	10	4	0	1	1	0	0	1	0	0	4
72	1	5	153	54	23.0681	28	0	100	8	7.46	17.4	15	25	14	3	1	1	1	0	0	0	0	0	0	2
74	1	0	155	60	24.974	23	1	95	6	15.94	17.4	15	21	14	2	4	1	1	0	1	1	0	0	0	3
71	1	2	143.9	56	27.0437	28	0	90	6	15.61	12.3	15	30	14	3	2	0	1	0	1	1	0	0	0	4
82	1	0	151.5	57	24.8342	28	0	100	6	19	15.9	15	14	14	4	3	0	0	0	1	1	0	0	0	0
76	1	2	147.1	68.3	31.5642	16	2	65	0		9.9	40		11	13	4	1	1	1	1	1	1	0	0	6
66	1	0	150	57.3	25.4667	20	0	100	8	10.8	29.5	15	21	14	3	1	1	1	0	0	0	0	0	0	5
65	1	2	161	51.6	19.9066	26	1	100	8	15.8	24.3	55	22	11	10	3	1	0	0	1	0	0	0	0	2
65	1	2	154	64	26.986	29	1	100	8	9.79	29.5	0	20	14	1	0	0	1	0	0	0	0	0	0
79	1	3	156.7	52.5	21.3807	30	0	100	8	8.52	22.3	15	18	13	3	0	1	0	0	0	0	0	0	0	4
79	1	3	154	51.9	21.884	30	0	100	8	11	18.2	15	20	9	6	2	1	1	0	0	1	0	0	0	3
82	1	0	150	53.6	23.8222	9		55	0		12.5	40		11	3	4	1	1	0	0	0	1	0	0	3
83	1	0	151	47	20.6131	16	1	70	1	14.55	16.4	40		10	8	4	0	1	0	0	0	0	0	0	2
74	0	2	164.5	63	23.2814	27	0	100	8	11.27	22.3	15	23	14	5	0	1	1	0	0	0	0	0	0	4
81	1	1	148.5	54.8	24.8501	24	0	100	7	10.29	18.76	15	22.5	14	7	0	1	1	0	0	0	0	0	0	3
77	1	0	157	53	21.5019	15		100	5	11.37	16	15	10	13	7	4	1	1	0	0	0	0	0	0	2
79	1	0				19	2	65	3		9.63	60		8	10		1	1	0	1	0	0	0	0
71	1	4	157	53.7	21.7859	29	4	90	8	14.86	10	15	37.2	3		3	0	0	0	0	0	0	0	0	2
78	1	1	146.7	71.2	33.0841	16	1	65	2		15.2	40		14	10	3	1	1	0	1	1	0	0	0	8
77	1	2	154	56.6	23.8657	26	1	95	7	9.5	23.5	15	9.6	14	3	2	1	0	0	0	0	0	0	0	1
76	1	0	150	58	25.7778	20	1	100	7	15.64	16.9	15	23	14	8	4	1	0	0	1	0	0	0	0	2
65	1	2	142	58.4	28.9625	23	0	100	8	8.54	18.1	15		14	3	2	0	1	0	0	0	0	0	0	1
78	1	0	145	47	22.3543	15		50	0		9.6	75		8	14		0	0	0	1	0	0	0	0
75	1	2				26	1	75	5	24.3	20.2			14	6	3	0	0	0	0	0	0	0	0	1
86	1	2	148	68.9	31.4554	14	1	60	1		11.6	50		12	6	4	1	1	0	0	0	1	0	0	3
88	1	0	140.2	55	27.9812	13	0	95	4	10.24	16.2	15		13	0	1	0	1	0	0	0	0	0	0	1
72	1	2	141	48	24.1437	29	1	95	8	12.52	20.1	15	22	14	12	2	1	1	0	1	0	0	0	1	2
88	1	0	160	79	30.8594			25	0		5.2	50		11	13		1	1	0	0	1	0	0	0
78	1	2	155	56.6	23.5588	26	0	95	4	11.25	11.9	40		13	4	4	1	1	0	0	0	0	0	0	3
67	1	4	153	39	16.6603	27	0	100	8	9.57	16.3	0	22.7	11	1	3	0	0	0	0	0	0	0	0
67	1	5	157.7	60	24.1261	30	0	100	8	11.72	22.9	15	32	14	4	0	1	0	0	0	1	0	0	0	2
73	1	0	152.8	59.4	25.4413	20	1	90	4		20	40		12	5	4	1	1	0	0	1	0	0	0	3
73	1	1	162	58	22.1003	20	0	100	7	6.67	26.2	0	30	12	0	1	0	0	0	0	0	1	0	0	0
79	1	0				15	0	90	3	16.77	14	40		14	0	4	0	1	0	0	0	1	0	0	1
87	1	0				17	2	50	2			60		8	3		0	0	0	0	0	0	0	0
70	1	2	152.7	62.6	26.847	27	1	100	8	10.39	32.6	15	16.5	12	6	1	0	1	0	0	0	0	0	0	1
88	1	0	151	41.7	18.2887	21	1	95	3	10.9	5.8	55		11	7	4	1	1	0	1	1	1	0	0	2
65	1	2				11	5	20	1		0	15		10	6		1	1	1	0	0	0	0	0
78	1	2	162.6	51.8	19.5924	23	0	100	5	11.9	16.7	65	20	12	7	4	1	0	0	1	0	0	0	0	4
81	1	2	160.9	51.9	20.0473	21	3	95	4	15.23	18.1	15		12	7	3	1	0	0	1	0	0	0	0
69	1	4	161	66	25.462	30	1	100	8	10.3	21	15	31	14	2	0	0	0	0	0	0	0	0	0	0
65	1	5	153	52.5	22.4273	28	1	100	8	7.21	19.5	15	31.5	13	6	0	1	1	0	0	0	0	0	0	3
67	1	3	140.1	49.4	25.1681	27	0	100	8	9.13	12.9	15	21	14	1	1	0	0	0	0	0	1	0	0	2
71	1	0	148.1	66.4	30.2732	20	2	95	5		14	40		11	12	4	0	1	0	1	0	0	0	0	2
65	1	4	156.4	70.1	28.6579	29	0	100	8	10.96	19.9	15	34.9	14	3	0	0	0	0	0	0	0	0	0	0
65	1	2	162	73	27.8159	26	1	100	8	8.91	22.6	40	20	14	9	0	1	1	0	0	0	0	0	0	3
69	1	3	152.5	48	20.6396	29	0	100	8	9.3	17.7	0	30	12	1	2	0	1	0	0	0	0	0	0	0
73	1	2	147.3	53.7	24.75	20	1	85	1	12.72	14.3	15		14	12	1	1	0	0	0	0	1	0	0	2
74	1	2	141	41.9	21.0754	28	1	100	8	12.12	22.6	15	16	13	9	0	0	0	1	1	0	0	0	0	2
69	1	2	150	56.7	25.2	24	0	100	8	7.7	16.6	15	18	14	4	1	1	1	0	0	0	0	0	0	3
69	1	3	148.4	48.3	21.9321	24	1	100	8	7.4	23	15	36	13	0	0	0	0	0	0	0	0	0	0	0
85	0	0	152.4	62.6	26.9528	14	1	85	2		16.1	40		14	3	3	0	1	0	1	1	0	0	0	2
97	1	0	156	44.2	18.1624	13	2	60	0		8.1	65		10	0	5	0	1	1	0	0	0	0	0	3
65	1	2	155	47	19.563	27	0	100	8			0		12	3		1	0	0	0	0	0	0	0
78	1	2	153.7	53.5	22.6468	25	1	100	5	12.5	12.7	15	13	13	7	2	1	1	0	0	1	0	0	0	4
84	1	0	154	58.4	24.6247	20	2	95	4	14.89	15.3	25	20.9	13	9	3	1	1	1	0	0	0	0	0	4
86	1	2		58		23	1	60	1		18.6	65		10	15		0	1	1	1	1	0	0	0
68	1	4	151.5	60	26.1412	30	1	100	8	9.89	20.1	15	25	14	1	1	0	0	0	0	0	0	0	0	1
83	1	0				14	1	45	0		13.6	25		13	6		0	0	0	0	0	1	0	0
77	1	2	147	45	20.8247	30	0	100	8	16.29	14.97	0	24.1	10	4	4	1	0	0	0	1	0	0	0	2
80	1	2	151.6	63.9	27.8037	21	1	95	6	12.56	17.2	15	20.3	14		2	1	1	0	0	1	0	0	0	3
70	1	2				22	0	65	1		11.9	75		5	17		1	1	0	0	0	0	0	0
72	1	3	161	64	24.6904	29	0	95	8	10.52	16.3	15	40.3	14	3	4	0	1	0	0	0	0	0	0	1
66	1	4	141	42.6	21.4275	29	0	100	8	12.97	16.9	15	24.5	13	4	1	0	0	0	0	0	0	0	0	3
65	1	2	160.3	68.6	26.6967	25	0	100	8	8.72	24.9	15	18	14	7	0	1	1	0	0	0	0	0	0	3
74	1	2	155.6	43.9	18.132	20	1	100	6			0		10	1		0	1	0	0	0	1	0	0
77	1	2				17	0	75	0		0	40		7	1	5	0	0	0	0	0	1	0	0	1
79	1	2	156	64.6	26.545	29	0	100	8	9.27	22.6	15	30	14	3	0	0	1	0	0	0	0	0	0	3
77	1	0	151.4	55.9	24.3871	17	0	80	1	10.5	22.4	15		14	7	1	0	0	0	1	0	0	0	0	3
89	1	3	153	66.8	28.536	19	4	60	0		8.4	50		11	11		1	1	0	1	1	0	0	0
71	1	2	148	44.5	20.3159	16	2	50	0		10.3	65		10	14	4	1	1	1	1	0	1	0	0	5
81	1	2	150	49.5	22	22	4	90	6		20.8	30		12	10		0	1	0	1	1	0	0	0
89	1	0				11	1	90	4		11.4	35		11	2		1	1	0	0	1	0	0	0
86	1	0	151.1	63.6	27.8566	11	0	70	1		12.2	55		14	3	3	1	0	0	0	1	0	0	0	2
71	1	2	152	50	21.6413	21	1	100	8	9.66	19.4	0	24	13	4	1	0	0	0	1	0	0	0	0
80	1	0	158	66	26.4381	15	2	30	1	13.53		65		8	9		1	1	0	0	0	1	0	0
81	1	0	143.6	41	19.8827	20	0	90	6		14.2	15		12	4	2	1	1	0	1	0	0	0	0	3
84	1	0	146	47.6	22.3306	16	0	100	8	11.89	18.1	15		12	10	0	0	1	1	0	0	0	0	0	2
75	1	2	145.8	43.3	20.3691	27	1	100	8	9.63	18.7	0	25	14	0	1	0	0	0	0	0	0	0	0	0
89	1	0	139	30.3	15.6824			55	0		7.2	70		10	0		0	0	0	1	0	1	0	0
67	1	2				30	0	90	8	14.32	14.8	15		14	3	2	1	1	0	0	0	0	0	0	3
87	1	4	149	54.9	24.7286	18	1	45	0	18.85	17.9	65		13	2	4	0	1	0	0	1	1	0	0	3
84	1	2	148	48	21.9138	16	0	80	2		13.4	40		13	8	4	0	1	0	0	1	1	0	0	5
70	1	2	146	52	24.3948	23	1	85	6		15.4	55		11	13	4	1	0	0	0	0	0	0	0	2
68	1	2	149.8	43.4	19.3404	26	0	100	8	7.99	19.8	40	25	10	3	0	1	1	0	0	0	0	0	0	4
90	1	2	161	43.7	16.87	11	5	65	1		14.8	60		11	3	3	1	0	0	0	0	0	0	0	0
80	1	0	150	48	21.3333	17	3	85	3		14.1	40		11	10		1	1	0	0	1	0	1	0
81	1	2	153.8	78	32.9748	14	2	65	0		13.3	40		11	9	3	0	0	0	0	1	0	0	0	3
82	1	0				11		10	0		8.5	90		6	2	5	0	0	0	0	1	1	1	0	5
76	1	2	134.7	53	29.2106	18	0	95	6	9.7	14	15		14	0	1	1	1	0	1	0	0	0	0	3
82	1	0	150.4	62.2	27.4976	19	2	85	2		16.9	15		14	3	3	1	1	1	1	0	0	0	0	4
84	1	0	147.8	52.8	24.1705	22	1	85	3	12.13	14.9	15	15	14	1	2	1	1	0	0	0	0	0	0	2
69	1	2	157.6	53.5	21.5398	26	2	95	4	15.32	17.6	25	29.9	10	4	5	1	1	0	0	0	0	1	0	3
80	1	0	150	54.7	24.3111	21	0	85	4	14.32	17.4	30		14	8	1	1	1	0	1	0	0	0	0	3
70	1	4	146.6	54.3	25.2657	28	0	95	8	10.17	23.8	15	13.5	14	8	1	1	1	0	1	0	0	0	0	4
75	1	2	148.5	52.6	23.8524	20	3	100	3	13.28	20.7	50		11	3	2	0	1	0	0	0	1	0	0	2
98	1	2	119.3	42	29.5099			25	0			65		10	4		0	1	0	0	0	1	0	0
91	1	2	150	45.5	20.2222	22	1	95	7	16.23	16.3	25		11	3	4	0	1	0	1	1	1	0	0	2
88	1	2	146.5	50	23.2967	22	2	65	1		17.07	40		11	5		1	0	0	0	0	0	0	0
80	1	0	154.7	63.4	26.4916	22	0	100	8	14.99	16.9	15	22	14	8	2	0	0	0	1	0	1	0	0	1
83	1	2	163	65	24.4646	27	1	95	4	13	15.2	15	15.6	14	4	4	1	0	0	0	0	1	0	0
83	1	0	151	62.7	27.4988	13	1	65	0		14.1	40		12	7	4	0	1	1	1	0	0	0	0	3
68	1	2	142	52	25.7885	17	1	85	5	57	11.6	75	10	14	4	4	0	0	0	0	0	0	1	0	1
73	1	3	155.9	54	22.2178	27	1	100	7	13.38	15.2	40	23.6	13		3	1	1	0	0	0	0	0	0	2
70	1	2	156	69	28.3531	21	0	90	3	14.25	14.4	25	20.9	14	11	3	1	1	0	0	1	1	0	0	3
70	1	2	152.9	53.4	22.8416	28	3	90	7	22.15	12.1	80	18.3	11	2	3	0	0	0	0	0	0	1	0	0
65	1	4	159.6	71.6	28.1091	30	2	100	8	11.03	27.3	15	25	14	2	0	1	1	0	0	0	0	0	0	3
75	1	3	157.9	67	26.8727	26	0	100	7	10.31	16.1	15	25.6	12		1	1	1	0	0	0	1	0	0	3
82	1	2	143.8	49.7	24.0347	9	1	60	0		10.2	65		13	10	5	0	0	1	1	1	0	0	0
84	1	2	147	44	20.3619	15	4	70	1		10.4	60		8	2	5	1	1	0	1	0	0	0	0	2
70	1	5	150.5	49.3	21.7658	30	0	100	5	11	18.1	15	16	13	3	0	1	1	1	0	0	0	0	0	3
88	1	0	132.5	32.8	18.6828			5	0			80		7	10	4	0	1	0	1	0	1	0	0	4
73	1	2	157.9	58	23.2629	18	0	90	8	13	16	25	30.7	14	4	3	1	0	0	0	0	0	0	0	2
79	1	0	156	65	26.7094	12	0	100	5	21.96	16.6	40		13	1	3	0	1	0	0	0	0	0	0	5
85	1	2	148	55.8	25.4748	22	0	95	4	24	12.1	25	11.2	11	3	4	0	1	0	0	0	1	0	0	2
83	1	2	157.3	50	20.2075	21	0	100	8	11.17	26	15	22	12	7	0	0	1	0	0	0	0	1	0	2
78	1	4	148	70	31.9576	29	0	95	8	12.74	15.2	15	29.1	14		2	1	1	0	1	0	0	0	0	2
69	1	2	155	55	22.8928	21	2	100	7	16.05	18.9	25		11	5	3	1	1	0	0	0	0	0	0	1
68	1	4	153.4	74	31.45	27	0	100	8	9.28	21.3	15	27.5	14	7	1	1	1	0	0	1	0	0	0	2
70	1	4	154	61	25.721	27	4	100	8	15.1	15.8	15		10	7	3	1	1	0	1	0	0	0	0	3
77	1	2	162.6	61.9	23.4126	20	0	95	3	14.97	22.1	40	37.7	13	16	3	0	1	0	1	0	0	0	0	3
74	1	2				19	0	100	2		11.6	65		5	7		1	0	0	0	0	0	0	0
76	1	2	153	56.1	23.9651	23	0	100	8	9.68	19.7	15	23.5	14	0	0	0	1	0	1	0	0	0	0	5
81	1	2	157.2	64.5	26.1008	21	3	95	8	20.13	11.3	50		14	8	4	1	1	0	0	1	0	0	0	3
84	1	3	140.3	43.5	22.0991	24	1	90	7	16.34	14.4	65		8	4	5	0	1	0	1	1	0	0	0	4
67	1	2	163.2	62.5	23.06	28	1	100	8	8.79	20.77	40		14	3	0	1	1	0	0	0	0	0	0	2
65	0	3	156	47	19.313	29	0	100	8	6.74	22.3	15	28.5	12	4	0	1	0	0	0	0	0	0	0	2
77	1	1	151.4	55	23.9945	22	1	100	7	16.27	14.8	65		14	6	4	1	1	0	1	0	0	0	0	4
86	1	0				16	2	50	0		8	90		7	1	5	0	0	0	0	0	0	0	0	0
74	1	2	144.9	44.1	21.004	23	2	100	6		14	40		11	0	4	0	0	0	0	0	0	0	0	0
77	0	2	153	47	20.0777	18	1	95	7			15		12	3		1	0	0	0	0	0	0	0
75	1	5	163.6	62.6	23.3888	30	1	100	8	9.98	15.5	15	29.5	14	6	1	1	1	0	0	0	0	0	0	3
74	1	4	147.5	39.3	18.06	27	2	100	8	9.7	14.9	15	32	11	1	3	0	0	0	0	0	0	0	0	1
79	1	0				19	2	85	4		13.5	40		14	10		1	1	1	0	0	0	0	0
74	1	4	153	46.1	19.6933	28	0	85	5		20	70		11	7	2	0	0	0	0	0	0	0	0	0
76	1	2				19	1	20	0		12.6	50		9	6		1	1	0	0	0	0	1	0
80	1	2	154	60	25.2994	26	0	100	8	8	25.5	15	32	14	0	0	1	0	0	0	0	0	0	0	1
66	1	4	161	60	23.1473	28	0	100	8	10.35	23.2	15	32	14	8	1	1	1	0	0	0	0	0	0	3
90	1	2	149.6	40.7	18.1858	20		45	2		7.3	40		4	5	5	0	0	1	1	1	0	0	0	3
83	1	2	148.5	58.1	26.3465	27	0	95	8	17.82	17.4	25	16.2	14	0	4	0	0	0	0	0	0	0	0
72	1	2	152	69	29.865	21	1	85	2	14.85	14.1	25		11	7	3	0	1	1	1	1	1	0	0	4
69	1	2	156	56	23.0112	18	1	90	1		16.6	40		14	6	4	1	1	0	0	0	0	0	0
75	1	5	150	49	21.7778	27	1	100	5		30	30		13	3		1	0	0	0	0	0	0	0
65	1	4	155	46.5	19.3548	30	0	100	7	8.2	24.73	15	26.33	12	3	1	1	1	0	1	0	0	0	0	2
79	1	5	155	48.5	20.1873	29	0	100	8	7.92	21.9	15	37.5	12	1	1	0	0	0	0	1	0	0	0	1
65	1	3	159	67	26.5021	29	0	100	8	8.9	23	15	17.4	14	4	2	1	1	0	0	1	0	0	0	2
66	1	2	158.1	75.1	30.0453	28	0	100	8	10.7	17.3	15	32	14	6	2	1	1	0	0	0	0	0	0	4
78	1	2	153.9	57.9	24.4456	29	2	100	7	11.23	27.8	15	20	14	5	0	1	1	0	0	0	0	0	0	3
80	1	0	154.1	58.7	24.7191	25	2	100	8	12.1	17	15		14	10	1	1	0	0	0	0	0	0	0	8
71	1	2	156.4	68	27.7994	22	1	100	7	12.3	15.3	0		14	2	4	0	0	0	0	0	0	0	0	0
77	1	5	161.9	57.5	21.9368	29	0	100	8	11.75	22.7	15	15	13	0	0	0	0	0	0	0	0	0	0	0
65	1	2	155.6	53.1	21.9319	29	0	100	8	9.92	24.6	15	35	13	3	0	1	1	0	0	0	0	0	0	3
77	1	0	148	65	29.6749	11	1	95	2		9.4	25		14	11	4	1	1	1	0	1	0	0	0	4
81	1	0	157	66.5	26.9788	20	2	95	8		14.7	80		9	5	4	0	1	0	0	0	0	0	0	2
78	1	0	154	78	32.8892	20	4	80	2		17.3	65		7	11	4	1	1	0	1	1	0	0	1	7
78	1	2	153	83	35.4564	22	1	55	1		21	30		14	15		1	1	0	1	0	0	0	0
82	1	0	155.7	48.4	19.9649	12	5	5	0			40		7	21	4	0	1	0	0	1	0	0	0	2
81	1	2	164.7	67.6	24.9207	22	2	90	4	16.84	14.1	25	14.1	10	1	4	1	1	0	0	0	0	0	0	4
72	1	5	164.5	61.3	22.6532	30	0	100	8	8.69	21.9	15	27	13	5	0	1	1	0	0	0	0	0	0	2
82	1	0	143.1	40.2	19.6312	19	5	75	2		13.5	40		8	4	4	0	0	0	0	0	0	0	0	3
74	0	0	144.8	45.5	21.7007	20	1	95	8	14.47	13.4	15	23	13	3	3	0	1	0	0	0	0	0	0	1
73	1	2				16		15	0		7.2	80		4	6		1	1	1	0	1	1	1	0
76	1	2	156.1	58.8	24.1308	30	0	100	8	16.21	19	15		14	9	1	1	1	0	0	0	0	0	0	3
78	1	4	159.2	49.8	19.6491	25	1	100	6	7	18.7	24	25	11	0	3	1	0	0	0	0	1	0	0	1
72	1	2	145	50	23.7812	25	1	90	3		22.9	65		14	3	2	0	1	0	0	0	0	1	0	2
93	1	0	144	55.2	26.6204			50	0		5.9	55		12	4	4	0	1	1	1	1	1	0	0	7
69	1	3	150	68.7	30.5333	28	0	100	8	14.08	21.9	15	27	14	10	2	1	1	0	1	0	0	0	0	4
67	1	2	145.9	50.3	23.6297	21	0	100	8	10.59	18.5	15	22	13	0	0	1	0	0	0	0	1	0	0	2
75	1	0	156.6	69.8	28.46	15	3	90	4		21.7	40		13	0	2	0	1	0	0	0	0	0	0	2
72	1	2	147	53	24.5268	29	1	100	8	12.67	19.6	15	28	14	2	0	0	0	0	0	0	1	0	0	2
103	1	3				22		85	2		10.9	40		10	2		0	1	0	0	0	0	0	0
73	1	4	153.2	56.7	24.1583	30	2	95	8	7.76	19.3	15	23	14	4	0	0	1	0	1	0	0	0	0	3
71	1	0	158	60	24.0346	25	0	95	6	9.41	15.67	15	22.67	12	10	2	1	0	0	0	0	0	0	0	1
86	1	0				5		15	0		0	50		7	10	4	0	0	0	0	1	1	0	0	4
67	1	2	156.1	75.4	30.9432	28	0	100	8	8.95	26.5	15	27	14	7	0	1	0	0	0	0	0	0	0	3
66	1	2	153	44	18.7962	25	2	95	5	21	14.3	40		11	6	4	1	0	0	0	1	0	1	0	2
69	1	0	152	62	26.8352	20	0	100	7	11.64	26.5	0	17	14	2	0	1	1	0	0	1	0	0	0	1
91	1	0	144.2	60.1	28.9031	23	0	65	0		5.6	50		12	7	4	0	1	0	1	0	1	0	0	2
66	1	2	154.6	64.4	26.9443	28	0	100	8	8.3	22.5	15	26	14	6	0	1	1	0	0	0	0	0	0	2
78	1	2	156.2	45.3	18.5668	18	1	100	8	12.5	20.1	15	18.5	10	4	1	1	1	0	0	0	0	0	0	4
75	1	2	147.2	53.5	24.691	24	0	100	7	8.72	26.4	15	21.5	14	9	1	1	1	0	0	0	0	0	0	1
69	1	5	157.7	74.1	29.7958	27	0	95	6	10.91	21.8	15	23	14	4	0	0	0	0	0	0	0	0	0	3
72	1	1	155	67	27.8876	27	0	100	6	7.43	24.4	15	18	14	3	1	1	1	0	0	0	0	0	0	2
83	1	2				24	1	65	2	23.63	12.07	40		14	20	4	1	1	0	0	1	0	0	0	3
77	1	0	152	56	24.2382	12		85	3		17.55	50		13	4		1	1	0	0	0	1	0	0
69	1	2	152	49.3	21.3383	24	0	100	8	11.64	21.1	15	21	13	3	0	1	0	0	0	0	0	0	0	2
85	1	2	150	42	18.67	6	5	75	0		5.33	75		6	3		0	0	0	0	0	1	0	0
69	1	3	150.5	54.2	23.9291	28	0	100	8	8	20.7	0	15	14	3	2	0	1	0	0	0	0	0	0	0
82	1	0	153.6	67	28.3983	18	1	80	1		16.9	40		14	3	4	0	1	1	0	0	0	0	0	3
76	1	3	149.5	49.5	22.1474	29	1	100	8	11.17	15.6	15	26.3	9	7	3	0	1	0	1	0	0	0	0	2
73	1	2	144	55	26.5239	25	3	90	3		17.4	40		9	10	4	0	1	0	1	1	1	0	0	3
69	1	2	158.6	56	22.26	22	0	100	8	9.58	20.93	15	36.67	13	3	1	0	0	0	0	0	0	0	0	0
81	1	2	139	48	24.8434	28	3	95	7	25.93	11	50		13	4	3	0	1	0	1	0	0	0	0	2
76	1	2	165	78.8	28.944	23	0	100	8	11.2	27.7	15	15	13	7	2	1	1	0	0	1	0	0	0	3
85	1	0				25	3	75	2		6.9	65		10	9		0	1	0	0	0	0	0	0
77	1	0	153	72	30.7574	26	0	100	8	9.8	16.4	30		14	6	1	0	0	0	0	0	0	0	1	3
73	0	2	160.7	61.2	23.6984	28	0	95	8	9.72	18.23	55	29	14	5	0	1	1	0	1	0	0	0	0	2
68	1	2	158.6	59.4	23.6146	21	0	100	5	17.35	19.27	40	19.17	14	9	3	1	0	0	1	1	0	0	0	2
68	1	2	151.2	61.5	26.9012	25	0	100	8	8.7	21.8	15	29	14	8	0	1	0	0	0	0	0	0	0	5
68	1	3	162	51	19.433	28	3	100	2	10	20.5	25	21	12	13	2	1	0	0	0	1	0	0	0	3
72	1	4	164.3	60.2	22.3008	19	0	100	8	9.7	23.1	15	23.5	13	0	0	0	0	0	0	0	0	0	0	0
80	1	0				19	1	70	1	10.32	12.9	50	7.2	13	7	3	0	0	0	1	1	1	0	0	5
67	1	2	142.7	64.9	31.8711	23	0	100	8	12.75	19.5	15	22	14	2	1	0	0	0	0	1	0	0	0	1
69	1	2	149.5	55.2	24.6977	29	0	100	7	7	24.4	15	29	14	6	0	1	1	0	1	0	0	0	0	2
69	1	3	155.7	46.6	19.2224	30	5	85	2		16.1	35		8	0	4	1	1	0	0	0	0	0	0	2
67	1	2				27	1	100	8	13.55	19.4	15	25	14	9	2	1	1	0	0	0	0	0	0	1
76	1	0	155.4	59	24.4315	20	0	95	8	11.47	17.5	15	30	14	3	2	1	1	0	0	0	0	0	0	2
69	1	0	148	50.5	23.0551	28	3	65	8	25	19.4	40		12	4	4	1	0	0	0	0	0	0	0	3
79	1	3				25	2	55	2		9.47	65		9	10		1	0	0	0	1	0	1	0
69	1	4	155	65	27.0552	29	2	100	8	12	15.4	25	15	14	15	3	1	1	0	1	1	1	0	0	3
74	1	2	160	69	26.9531	26	0	95	8		20.3	40		14	0	2	0	1	0	0	1	0	0	0
74	0	2	151.8	58.1	25.2135	29	0	95	8	12.1	13.5	15	31	14	12	1	1	0	0	0	0	0	0	0	2
87	1	2				26	4	10	0		10.6	35		4	2		1	1	0	0	0	0	0	0
88	1	3				12	3	30	1		10.6	35		9	7		1	1	0	0	0	0	0	0
73	1	5	159	59	23.3377	29	0	100	7	9.63	18.8	15	28	14	2	0	1	1	0	1	0	0	0	0	1
75	1	4	165.9	75.4	27.3955	29	2	95	6	14.43	20.2	10	22	14	0	2	0	0	0	0	0	0	0	0	1
89	1	3	138.3	43.4	22.6906	18	1	65	2		12.8	40		12	18		1	0	0	1	1	0	0	0
80	1	1	139.7	28.4	14.55	25	0	70	3	15.3	12.9	40	7	11	7	4	0	1	0	1	1	0	0	0	0
78	1	4	149.1	54.5	24.5155	29	2	100	8	11.95	20.9	30	27.3	13	1	1	1	0	0	0	1	0	0	0
87	1	0	145.1	47.3	22.466	17	0	85	2	47.8	16.6	65		12	8	3	0	1	1	0	1	0	1	0	2
68	1	2	159	81	32.0399	30	0	100	8	6	26.3	15	32	14	1	0	1	0	0	0	1	0	0	0	1
72	1	3	156	75	30.8185	25	4	100	7	10		15		14	7		1	1	0	0	0	0	0	0
78	1	2	156	63.8	26.2163	11		85	1		14.1	40		11	10	4	1	1	0	1	0	1	0	1	8
80	1	1	144.1	39.1	18.8299	22	0	100	8	9.63	24.8	0		11	1	0	0	0	0	0	0	0	0	0	0
81	1	5	152	56.7	24.5412	19	0	55	1		10.3	75		10	8	5	1	1	1	0	0	0	0	1	3
83	1	5				18	1	60	1		9.8	50		9	14	4	1	0	1	0	0	1	1	1
80	1	3				22	1	60	2		10.1	80		8	2	4	0	1	0	1	0	0	1	0	0
58	1	5	159.1	51.2	20.2269	30	1	100	8	12.22	21.1	15	29	10	7	1	0	1	0	1	1	0	0	0	3
79	1	2				10	1	10	1		15.2	35		12	15	4	1	1	1	0	1	0	0	0	5
67	1	4	158.3	65.8	26.2581	28	1	100	8	10.13	24.6	15	31.4	14	7	0	1	1	0	0	1	0	0	0	3
97	0	5				11		10	0			15		9		4	0	0	1	1	0	0	0	0	1
91	0	5	154.7	46	19.2211	29	0	100	6	39	20.2	25	16.4	11	5	4	0	1	0	1	1	0	0	1	3
71	0	5	157.2	79.6	32.2113	29	0	100	6	8.28	36.7	15	25	14	9	0	1	1	0	0	1	0	0	0	7
87	0	4	159.7	55.5	21.7612	27	3	95	6	27.98	20.3	40		10	5	3	0	1	0	1	1	0	0	0	4
86	0	4	164.9	61.9	22.764	23	2	95	3	19.73	22.2	65	24.5	13	6	4	0	0	0	1	0	0	0	0	2
84	0	1				20	1	95	3	15.6	29	50		14	4	3	0	1	0	0	0	0	0	0	1
75	0	5	163	91.5	34.4386	18	3	45	1		12.8	75		7		5	1	0	0	0	0	1	0	0	5
79	0	4	160.6	62.5	24.232	26	0	95	8	9.08	27	15	23.5	14	4	2	0	0	0	0	0	0	0	0	3
82	0	2	157.3	64.5	26.0677	25	0	100	5	14.81	26.3	15		14	4	2	0	0	0	0	0	0	0	1	2
81	0	3	162.8	67.3	25.3925	29	0	100	4	10.12	30.2	15	26	14	3	0	1	0	0	0	0	0	0	0	2
76	0	5	161	68	26.2336	27	5	95	4	12.4	31.5	15	21	9	1	3	1	0	0	0	0	0	0	0	1
90	0	5	160	75	29.2969	14	0	60	1		23.4	40		14	3		0	1	0	1	1	0	0	1
94	0	5	163.4	48	17.9778	23	0	85	4	11	19.7	25	19.7	11	2	4	1	1	0	0	1	1	0	0	4
82	0	2	164.1	72.1	26.7743	19	0	95	4	9.16	31.2	15	26	14	4	1	1	1	0	0	0	0	0	0	2
87	0	2	171.4	54.8	18.6534	20	0	100	2	29	25.3	30	14.7	9	4	4	0	0	0	0	0	1	0	1	1
65	0	3	162.6	69	26.098	24	0	100	6	9.86	34	15	32.7	14	6	1	0	0	0	0	0	0	0	0	1
68	1	5	169.9	64	22.1714	29	1	100	7	7.22	42	15	15	13	3	0	0	1	0	0	0	0	0	0	1
84	0	5	158	60	24.0346	24	3	100	8	14.34	30.7	25	13	14	4	3	0	1	0	1	1	0	0	1	1
94	0	4	154.6	40.2	16.8193	12		50	2		13.6	75		7	20		0	0	0	1	1	0	0	0
68	0	5	177	77	24.5779	30	0	100	7	9	44.6	15	41.5	13	8	0	1	1	1	1	1	0	0	0	4
87	0	2				20	0	55	0		18.2	40		8	2	5	0	0	0	0	1	0	0	0	0
87	0	2				26	0	65	2			50		8	5		0	0	0	0	0	0	1	0
83	0	2				19	1	90	2		22.9	40		9	6		0	1	0	1	1	0	0	0
93	0	3	156	63	25.8876	21	1	75	4		22.3	40		14	1	4	0	1	0	1	1	0	0	0	2
87	0	2	170.2	64.2	22.1624	22	5	100	3		26.4	40		9	4	2	0	0	0	0	0	0	0	1	4
68	0	4	168	69.5	24.6244	29	0	100	8	11	28.83	15	22.33	14	1	0	0	0	0	0	0	0	0	0
88	0	3	162	63.7	24.2722	27	1	100	2		27.3	50		14	12		1	1	0	0	0	0	1	0
67	0	2	167	62	22.231	27	3	90	4	15.03	29.1	15	17.5	13	11	3	1	0	0	0	0	0	1	0	4
81	0	2	161.5	73.4	28.1417	29	0	100	6	18.36	14.5	15	19.67	14	3	3	0	1	0	0	0	0	0	0	2
76	0	2	155.5	54	22.3323	26	0	100	6	15.92	23.1	10		13	5	4	1	1	0	0	1	0	0	0	3
75	0	0	152	63	27.268	23	3	100	8	12.47	26.8	15	23	14	5	1	0	1	1	0	1	0	0	0	2
84	0	2	166.5	70.8	25.5391		0	90	4		21.5	15		14	16	2	1	0	0	1	1	1	0	1	4
68	0	3	170	78	26.9896	30	1	100	5	8	34.3	15		11	0	2	1	0	0	0	0	0	0	0	2
87	0	2	157.8	60.5	24.2964	20	0	90	5		23.5	30		14	6		0	1	0	0	0	1	0	0
83	0	4	167	73.3	26.2828	22	0	85	2	21.04	22.7	40		13	5	5	1	1	1	1	0	1	0	0	3
84	0	3	165	63	23.1405	24	0	100	8	11.42	18.03	15	10.83	14	9	4	0	1	0	1	1	0	0	1	2
89	0	2	165.1	63.2	23.1858	19	2	90	2		9.5	25		13		3	0	0	0	0	0	1	0	0	1
71	0	5	162	56.8	21.643	27	1	100	7	10.25	26.9	15	22	13	10	2	1	1	1	0	0	1	0	0	3
83	0	4	169.2	63.7	22.2504	25	0	100	7	10.65	25.7	15	24	13	15	2	1	1	0	1	1	0	0	0	2
78	0	5				10		60	1	31.32	14.9	70		11	2	4	1	1	1	0	1	1	0	0
71	0	2	154.2	54	22.7104	20	0	95	6	12.33	22.4	15		14	4	2	1	0	0	0	1	0	0	1	3
75	0	0	160	68	21.57	22	0	90	7	25	22.33	15	23.33	14	8	2	1	1	0	1	0	0	0	1	3
88	0	5	168	68.5	24.27	14	0	65	1		10.03	35		13	11		0	1	1	1	0	1	0	0
87	1		162	57.4	21.8717	21	1	75	2		21.33	60		13	5		0	1	1	1	0	1	0	0
70	0	5	168	76	26.9274	28	0	100	8	14.33	31.6	15	25	14	5	0	1	1	0	0	0	0	0	1	4
68	0	5	170.9	75.7	25.9186	29	0	100	6	10.55	44.1	15	29.6	13	3	0	0	1	0	1	1	0	0	0	5
90	0	3	173.9	81.5	26.95	24	4	60	2		34.9	75		14	14		1	1	1	1	0	0	0	0
80	0	5	161.5	65.9	25.2662	28	5	55	1		15.5	65		9	16	5	0	1	0	0	0	0	0	0	4
83	0	3	160	59	23.0469	28	1	100	8	8	23.87	15		14	7	0	0	1	0	1	0	0	0	1	1
71	0	3	164	68.8	25.58	26	2	100	3	10.11	34.7	15	24.7	5	10	2	1	0	0	0	0	0	0	0	3
78	0	5	174.1	66.2	21.8404	29	2	95	6	12.49	25.4	50		10	13	3	1	1	0	0	1	0	0	0	3
76	0	0				17	0	95	6			0		14	1		0	0	0	0	0	1	0	0
68	0	4	163.2	70.9	26.6199	29	1	100	7	6.73	29.7	15	42	14	3	0	0	1	0	1	1	0	0	0	2
92	0	2	170	58	20.0692	17	0	90	6		23.4	15		11	0	2	0	0	0	0	0	0	0	0	0
70	0	5	162.3	74.7	28.3585	27	0	100	7	13.21	37	15	37	14	0	0	0	0	0	0	0	1	0	0	1
85	0	4	160.3	62.5	24.3228	24	0	85	3	14.62	36.4	30	23	14	4	1	0	0	0	0	1	0	0	0	2
89	0	0	161.1	58	22.3479	9	1	60	1	32	23.9	25		13	0	4	0	0	0	0	0	0	0	0	0
80	1	2	162.6	43.5	16.4531	19	1	100	4	11.1	27.8	15	32.6	8		2	0	0	0	1	1	0	0	0	3
68	0	5	167.9	58.8	20.8582	27	0	100	8	10.97	31.4	40	33.7	12	1	0	0	1	0	0	0	0	0	0	3
74	0	2	158	61.5	24.64	24	2	100	8	11.48	36.13	15	33.5	12	4	1	1	1	0	0	0	1	0	0	4
71	0	4	168	72	25.5102	30	1	100	8	10.25	34.57	0	21.17	13	6	0	1	1	0	0	0	0	0	0	2
67	0	5	161.4	59.8	22.9559	28	0	100	8	8.97	39.5	15	29	14	4	0	1	0	0	0	0	0	0	0	2
79	0	1	164.5	61.4	22.6901	23	3	90	2	15	7.6	40		13	12	4	1	1	0	1	1	0	1	1	2
82	0	5	160.3	62	24.13	29	3	100	8	11	32.27	15	26	14	10	0	1	1	0	1	0	0	0	1	2
68	0	2	159.6	58.4	22.927	18	0	100	4	16.27	30.1	15		13	15	2	1	0	0	1	0	1	0	0	6
87	0	5	158.8	64.3	25.4982	30	1	90	5	18.68	26.3	30		14	9	2	1	1	0	0	0	0	0	0	4
65	0	4	164.2	66.2	24.55	29	0	100	7	16	28.2	15	15.67	14	7	1	0	1	0	1	1	1	1	1
85	0	2						0	0			70		5	12		1	1	0	0	1	1	0	0
79	0	3	162.5	77.5	29.3491	27	3	100	7	14.74	37.3	15	18.07	9	7	3	1	1	0	0	0	0	0	0	4
84	0	4	154.4	72.4	30.3699	29	1	75	2		25.7	40		14	20	2	1	1	1	1	1	0	0	0	6
89	0	4	161.3	58.6	22.5231	24	0	100	7	10.53	21.3	15	24.2	14	6	2	0	1	0	0	1	0	0	0	3
87	0	2	155.7	60.7	25.0387	24	1	90	4		13.8	40		14	3	3	1	0	0	0	0	0	0	0	2
85	0	2	157	43	17.4449	18	4	95	2	15.54	10.56	15	10	12	9	4	0	1	0	1	1	0	0	0	1
80	0	2	165.7	66.1	24.0745	26	1	100	7	10.47	29.4	15	32	14	7	0	0	1	0	1	0	0	0	0	1
77	1	4	160	66	25.78	27	1	100	8	10.6	27.7	24.3	26.7	15	6	0	1	1	0	0	0	0	0	0	1
83	0	2	162.6	65.2	24.6608	26	2	85	2	14.37	26.2	55		14	10	0	1	1	0	0	0	1	0	0	3
77	0	0		82.2		9	1	5	0		11	15		11	10		0	1	1	1	1	0	1	0
87	0	2	149	61.7	27.7915	11	1	45	0		16.6	40		14	7	4	0	1	1	0	0	1	1	0	4
81	0	2	166	75.1	27.2536		0	75	3	14.79	23.3	15		14	4	4	1	1	1	0	0	1	0	0	2
89	0	2				16	1	55	0		20.3	50		12	15		0	1	1	0	1	1	0	1
76	0	2	161.2	63.1	24.2828	25	0	100	7	13.72	24.6	15		14	0	1	0	1	0	0	0	1	0	0
70	0	2	162	69	26.2917	23	0	95	8	12	31	15	20	14	10	0	0	1	0	0	0	0	0	0	2
74	0	2	153.1	51.7	22.0567	26	2	100	6	15.09	23.2	40	25.7	11	4	2	0	0	0	0	0	0	0	0	0
65	0	5	160.1	57.5	22.4329	24	1	100	5	11.13	41.1	15	30	13	1	0	1	1	1	0	0	0	0	0	4
67	1	5	151	63.4	27.8058	29	0	95	8	14.16	22.4	50	24	14	0	2	0	0	0	0	0	1	0	0	1
78	1	4	142	43.5	21.5731	17	3	55	1	37.4	13.6	75		12	13	4	0	1	0	0	0	1	0	0
94	1	4				18	0	85	1		11.4	40		14	4		0	1	0	1	1	1	0	0
82	1	0				15											0	1	0	0	0	1	0	0
67	1	4	160	75	29.2969	27	0	95	8	5.2	31.3	15	26	14	4	0	1	1	0	0	0	0	0	0	3
75	1	3		59.5		24	2	100	4		19.6	55		8	2	2	0	1	0	0	0	0	0	0	2
70	1	2				27	3	70	3		15.5	65		13	12		0	1	0	1	0	0	0	0
68	1	4	158	53.8	21.551	28	1	100	8	11.91	16.7	15	27.5	13	5	2	1	1	1	0	0	0	0	0	3
78	1	2	160.5	60.4	23.447	23	4	90	3		13.2	50		7	13	4	0	1	0	1	0	0	1	0	3
86	1	0	150	54.7	24.3111	19	0	100	5	12.7	14	30		14	8	1	1	1	0	0	1	0	0	0	5
83	1	2				23	0	100	8	12.79	19.2	25	13.5	14	7	1	1	1	0	1	1	0	0	0	3
84	0	1	145	43.5	20.6897	19	1	95	2	30	12.6	15	12.6	11	7	4	0	1	1	1	0	1	0	0
84	0	1	142.1	40.2	19.9085	15	1	95	4		13.5	55		12	9		0	1	1	0	0	1	0	0
76	1	3	154.8	51.2	21.3662	27	2	90	7	9.91	23.4	25	32.5	11	3	2	0	0	0	0	0	1	0	0	3
75	1	2	150	53	23.5556	8		30	0			50		11	6		1	0	0	0	1	1	0	0
76	1	2	155.1	63.3	26.3136	22	1	95	7	15.56	17.4	25		14	4	4	0	1	0	1	0	0	0	0	2
79	1	2	145	65	30.9156	26	0	100	8	13.24	22.1	0	21	14	1	2	1	1	0	0	0	0	0	0	0
37	1	2	157	64	25.9645	27	0	100	8	8.98	24.4	15	26.2	14	12	0	1	1	0	0	0	0	0	0	3
90	1	0	143.6	43.5	21.095	19	1	70	2		3.2	40		12	14	4	0	0	1	1	1	0	0	0	4
81	1	0	149	53	23.8728	23	0	95	5	10.58	17.8	40		14	8		1	1	1	1	1	1	0	0
79	1	2	148	62	28.3053	27	0	100	5	10	19.7	15	20	14	8	2	1	1	0	0	0	0	0	0	2
83	1	1	154.7	56.8	23.7338	14	3	100	3	17	15.6	25	27.5	10	11	2	0	1	0	1	0	1	0	0	8
71	1	2	156.3	57.6	23.5779	30	0	100	8	7.62	26.4	15	32	14	5	0	1	1	0	1	0	0	0	0	3
74	1	2	155.3	56.2	23.302	20	0	90	6	17.66	18.5	15	23	14	13	0	1	1	0	1	1	1	0	0	5
67	1	2	155	84	34.9636	23	4	95	8	8.02	16.7	15	25	14	3	3	0	1	0	1	0	0	0	0
83	1	3	151	77.8	34.1213	29	0	100	5	21.97	11.1	15	15.5	14	20	4	1	1	0	1	0	0	1	1	4
67	1	4	153.8	59.3	25.0693	30	1	100	8	11.05	24.3	15	28.5	14	1	0	1	1	0	0	0	0	0	0	1
89	1	2	154	47.6	20.0708	25	1	85	3	17.91	15.5	40		12	8	4	0	0	1	1	0	0	1	0	2
65	1	3	149	50.2	22.6116	27	0	100	7	11.03	22.6	15	28.1	13	3	1	1	1	0	1	0	0	0	0	2
69	1	2	152.7	57.1	24.4883	16	0	100	4	14.78	15.3	30		14	5	2	1	1	0	0	1	1	0	0	4
77	1	2				29	1	80	7		15.8	50		14	5	2	0	1	0	0	0	0	0	0	2
79	1	2	149.2	64.9	29.1546	14	3	50	2		14.3	90		12	0		1	0	0	0	0	1	0	1
72	1	2	154	58	24.4561	29	1	100	6	15	12.17	15	7.17	14	2	3	0	0	0	0	0	0	0	0	2
79	1	0	159.7	66.5	26.0742	19	1	100	4	15.31	16.4	15		14	3	3	0	0	0	0	0	1	0	0	2
78	1	3	142.4	43	21.2055	28	0	100	8	8	15.5	15	22	13	13	1	0	0	0	0	0	0	0	0	1
92	1	2	147.3	49.7	22.9061	12	1	20	0		6.3	15		9	23	4	0	0	0	1	1	0	0	0	2
87	1	2				13		55	0		13.1	75		7	11	4	1	1	0	1	1	1	0	0	6
85	1	2				9		50	0			105		9	11	3	1	1	0	0	1	1	0	0	14
87	1	0				11	2	65	1			50		8	7		1	1	0	0	0	0	0	0
71	1	3	147	58	26.8407	29	1	90	8	19.67	22	25		14	12	1	1	0	1	0	0	0	0	0	5
73	1	5	150.1	45.9	20.3728	28	0	100	4	12.72	19.8	15	25.8	12	1	2	0	0	1	1	0	0	0	0	2
88	1	0	150	51.2	22.7556		1	75	1	20.06	15.4	65	19	11	3	4	1	0	0	0	0	1	0	0	2
82	1	5	148.3	47.7	21.6888	26	1	100	8	13.21	15.2	50	15	11	7	3	1	0	0	1	0	0	0	0	3
79	1	2	150.6	44.4	19.5764	27	0	100	8	19.9	18	50		10	6	3	1	1	0	0	0	0	0	0	3
69	1	0	140	71	36.22	15	0	100	5	13.36	6.03	15	17.33	14	10	3	1	1	0	0	0	0	0	0	3
82	1	0	147.8	47.8	21.8816	13	2	95	6	15.7	24	15	15	11	1	3	0	0	1	0	0	1	0	0	2
66	1	2	155.6	57.1	23.584	26	0	100	8	9.45	16.3	15	25	13	4	0	1	0	1	0	1	0	0	0	4
75	1	0				13	2	70	1	25	27.2	55		13	5	3	0	1	0	0	1	1	0	0	1
72	1	0	158.6	58.1	23.0978	20	0	100	6	11.7	17.5	15	31.5	14	2	2	1	1	0	0	0	0	0	0	2
74	1	0	144.1	51.2	24.6571	14	1	95	8		14.7	65		13		4	0	1	0	0	0	1	0	0	3
92	1	0	148	54	24.653	9	0	20	1			25			9		0	1	0	0	0	0	1	0
68	1	3	158	46.4	18.5868	30	0	100	7	13.9	16.23	40	15.67	11	8	3	1	1	0	0	1	0	0	0	3
72	1	3	151.6	66.5	28.935	30	0	90	5		18.9	30		12	5	0	1	1	0	1	0	0	0	0	3
75	1	2	146.6	65.4	30.4306	28	3	85	6	9.79	24.1	25	23	14	2	2	1	1	0	0	0	0	0	0	1
81	1	2	153	51.7	22.0855	15	4	80	3	48	8.2	80	11.6	13	7	4	1	1	0	1	1	1	1	0	2
65	1	3	156.2	61.5	25.2065	26	0	100	8	10.31	20.5	15	28	14	7	0	1	0	0	0	0	0	0	0	1
69	1	2	150	59	26.2222	27	0	100	8	7.12	19.2	15	24.5	14	8	0	1	1	0	0	0	0	0	0	2
65	1	4	155	61	25.3902	30	0	100	8	6.97	23	15	26	14	4	0	1	1	0	0	0	0	0	0	3
78	1	2				19	0	90	8	19.98	19.8	10		10	0	2	0	0	0	0	0	1	0	0	1
70	1	5	154	56	23.6128	29	2	100	7	11.47	24.9	15	33.4	14	0	1	0	1	0	0	0	0	0	0	1
76	1	2	152	73.6	31.856	21	0	95	4	17.31	17.7	40	20.5	13	5	4	1	1	0	0	1	1	0	0	5
72	1	2	158	53	21.2306	28	0	100	6	9.36	17.2	15	22	13	8	0	1	1	0	0	0	0	0	0	2
69	1	4	160	75	29.2969	25	0	100	8	8.59	22	40	32	14	7	0	1	1	0	0	0	0	0	0	4
74	1	2	148.8	58.9	26.6017	21	1	90	6		14.7	40		14	7	3	1	1	0	0	0	0	0	0	2
75	1	4	147.1	58.9	27.2201	25	0	80	8	36.86	9.2	80		12	7	4	1	1	0	1	1	1	0	0	7
75	1	2	151	50	21.9289	27	3	95	6	15.2	14.2	15	29	9	6	5	1	1	0	0	0	0	0	0	2
73	1	2	148.9	60.3	27.1974	18	1	75	2		20.1	75		14	6	3	1	1	0	1	1	0	0	0	3
69	1	2				24	3	75	4			75		13	3		0	0	0	0	1	0	0	0
69	1	3	153.7	57.1	24.1707	27	2	100	8	13.7	21.5	15	32	12	2	1	0	1	0	1	0	0	0	0	1
82	1	0	150.7	45.1	19.8587	17	3	70	0		8	40		11	7	4	0	1	0	0	0	0	1	0	2
72	1	2	143.2	58.4	28.4791	20	3	95	6	14.67	10	35		14		4	0	0	0	0	1	0	0	0	2
79	1	3	150	48	21.3333	26	5	100	7	10.2	19.6	15	21	9	0	2	1	0	0	0	0	0	0	0	1
74	1	0	145	49	23.3056	24	1	95	7	9.43	18.8	15	8	14	4	2	1	1	0	0	0	0	0	0	2
79	1	3				23	5	60	3			90		7	4	5	1	1	0	0	0	0	0	0	4
76	1	2				14		90	3	14	11.6	60		9	5	4	1	1	1	0	0	0	0	0	3
72	1	4	161.4	56.9	21.8426	30	3	100	8	8.15	19.5	15	30.7	11	8	1	1	1	0	0	0	0	0	0	4
79	1	2	157	66	26.7759	25	3	100	7	12.75	24	40	20.8	14	5	0	0	0	0	0	0	1	0	0	1
76	1	2	148	52	23.74	24	1	80	3		11.8	40		13	9	2	1	1	0	0	0	0	0	0	5
70	1	2	157	62	25.1532	18	0	90	8	9.72	18.8	15	20	14	9	0	1	1	0	1	0	0	0	0	4
63	1	2	152	60	25.9695	26	3	95	8		18.6	0		10	0	1	0	1	0	0	0	0	0	0	1
64	1	4	155	52.1	21.6857	29	1	100	8	10.26	20.3	15	30.6	11	3	1	0	1	0	0	0	0	0	0	1
79	0	4	160	49	19.1406	20	2	95	3	26.43	19.3	65		9	15	4	1	1	0	1	0	0	0	0
75	0	5	165	56	20.5693	17	2	90	3		17.8	65		9	4		0	0	0	0	0	0	0	0
88	0	4	175	69	22.5306	25	1	100	6	14.04	28.9	15	27.7	13	8	1	1	1	1	0	0	0	0	1	5
81	0	5	163.7	73	27.2412	26	0	100	7	10	40.2	15	22	13	1	1	1	1	0	0	0	0	0	0	2
87	0	5	160.5	54.1	21	27	0	90	6		24.1	30		13	21		1	1	0	1	1	0	0	0
87	0	2	161	56	21.6041	30	0	95	6	12	34.2	15	15.2	11	8	1	1	1	0	0	0	0	0	0	1
92	0	3						40	0		10.4	95		7	11	5	1	1	1	1	1	1	1	1	4
90	0	3	164.4	56.6	20.9417	10	2	40	0		13.8	70		9	3		1	0	0	0	0	1	0	0
72	0	3	172	72	24.3375	27	0	100	6	10.17	24.6	15		14	11	2	1	1	0	1	0	0	0	0	2
73	0	5	178	76	23.9869	23	0	100	6	25	27.2	0	21	14	0	1	0	0	0	0	0	0	0	0
86	0	4	162	58	22.1003	21	0	100	5	20.43	10.5	40		13	4	2	1	0	0	0	1	1	0	0	3
86	0	4				26	5	80	2		18.4	55		1	2	5	1	1	0	0	0	0	0	0	3
79	0	4	162.5	62.5	23.6686	29	0	95	7	13.58	31.2	25	31	14	5	2	0	1	0	1	0	0	0	0	2
68	0	2	151.3	46.5	20.313	25	1	100	7	10.88	31.5	15	19	12	0	0	1	0	0	0	0	0	0	0	1
73	0	3	164.5	72.5	26.7921	29	0	100	8	10.63	30.2	15		14	5	0	1	1	0	0	0	1	0	0	2
66	0	3	172.2	84.2	28.3953	30	0	100	6	11.44	40	15	36.2	14	4	0	1	1	0	0	0	0	0	0	4
65	0	4	156.6	81.2	33.111	28	4	95	4	13.99	20.1	15	17.5	9	8	5	1	1	0	0	0	0	0	0	3
90	0	1	165	71	26.079	28	0	75	3	17	18.7	40		14	9	1	1	1	0	0	0	0	0	1	3
81	0	2	161.9	62.2	23.7299	18	3	85	0		24.4	65		11	18		1	0	1	1	1	0	0	0
74	0	5	164	63	23.4236	22	0	100	2	10.25	21.2	15		14	7	2	1	1	1	0	1	0	0	0	3
86	0	1					4	70	0		9.6	65		11	12	5	1	0	1	1	0	1	0	0
89	0	5				15		50	0			80		10	0		0	1	0	0	0	0	0	0
91	0	4	163.9	65.9	24.5317	16	0	80	1	14.22	17.3	80		12	1	2	0	1	0	1	0	1	0	0	2
83	0	0	152	60	25.9695	22	1	100	8	8.61	23.7	15	17.5	13	11	1	1	1	0	1	1	0	1	0
73	0	3	162.8	54.7	20.6385	25	1	100	7	8.59	26.1	0	26	12	2	1	1	0	0	0	0	0	0	0	2
77	0	2	158.3	85.9	34.2793	16	0	100	3	15.85	28.9	25	17.6	14	8	1	1	1	0	1	1	0	0	0	6
73	0	5	169	62.5	21.883	24	0	100	7	7.97	34	15	28	12	5	0	0	0	0	1	1	0	0	0	5
92	0	5	159	49	19.3821	24	2	95	7	17.14	17.1	25		12	0	4	1	0	0	0	0	0	0	0	2
73	0	5	160.5	67.9	26.3584	29	2	100	6	10.19	32.6	40	33	14	9	0	0	0	0	0	0	0	0	0	1
83	0	2				13	0	100	6	23.15	22.7	25		14	5	4	0	1	0	0	0	1	0	0	2
90	0	5	174	75	24.7721	28	3	80	3	20	23.77	65		14	5	2	0	1	0	1	0	0	0	1	2
90	1	1	163	64	24.09		0	85	3	27.32	17.8	40		12	9	4	0	0	0	0	1	0	0	0	1
85	0	4	158	63	25.2363	21	1	95	3	12.86	22.17	25		14	2	4	0	1	0	0	0	1	0	0	2
74	0	4	166.5	67	24.1	27	0	100	7	8.9	28.5	0	36.2	14	4	0	1	1	0	0	0	0	0	0	1
77	0	2	155	53.4	22.2268	29	1	100	5	12	26.3	15	25	13	7	0	1	1	0	1	1	0	0	0	4
74	0	5	164	60	22.3081			100	3	12.32	28.3	40	36	12	3	3	0	0	0	0	0	0	0	0	0
80	0	2				29	0	100	7	8.94	37	15	32	14	1	0	0	1	0	0	0	0	0	0	1
77	0	5	166	77	27.9431	27	2	95	5	10.34	38	25	17	14	8	2	1	0	0	0	1	1	1	0	3
68	0	4	168.5	79	27.8245	30	0	100	6	8.62	47.8	15	27	14	9	0	1	1	0	0	1	0	0	0	4
77	0	5	157	67	27.1816	29	0	100	8	9.45	29.4	15	27	14	10	0	1	1	0	1	1	0	0	0	5
91	0	0	175	77	25.1429	23	1	95	5	13.67	26.3	30	16.5	14	9	3	0	1	0	0	1	0	0	0	0
89	0	3	165	67	24.6097	28	1	90	3	19.22	27.9	65		12	7	3	0	1	0	1	0	0	0	1	3
76	0	4				28	4	100	3		20.1	25		7	6	4	0	1	0	0	0	0	0	0	1
68	0	3	174.6	75.9	24.8974	26	0	100	5	8.04	32.4	0	30	12	3	0	1	1	0	0	0	0	0	0	2
67	0	3	166	64	23.2254	28	2	100	6	14.39	33.8	15	27	13	4	2	0	1	0	0	0	0	0	0	1
79	0	2	162	67	25.5296	28	0	100	8	10.56	33.93	0	22	14	1	0	0	0	0	0	0	0	0	0	0
84	0	4	173	79.1	26.4292	27	1	95	3	16	34	25	27.2	12		1	1	1	0	0	0	1	0	0	3
85	0	4	167.9	73.5	26.0727	28	1	80	2	11.66	38.3	15	34.3	12	15	2	1	1	0	1	0	0	0	0	4
68	0	5	168.7	74.2	26.072	29	0	100	7	14.52	38.2	25	13.5	14	5	0	0	0	1	0	0	1	0	0	2
74	0	5	168.6	75.6	26.5954	28	0	100	8	6.87	50.1	15	42	14	3	0	0	1	0	0	0	0	0	0	1
77	0	1	168.3	68.9	24.3249	20	1	100	3	11.19	24.6	15	20	13	7	1	1	1	0	0	1	0	0	1	3
77	0	5	169.3	70.6	24.6315	30	0	100	8	8.72	38.7	15	37	14	2	0	1	1	0	0	0	0	0	1	4
66	0	5	163	66	24.841	30	2	100	5	6.5	35.2	15	28.16	14	3	2	0	0	0	0	0	0	0	0	2
76	0	4	159.7	59.1	23.1728	27	1	100	8	10.31	31.2	25	16	14	1	2	1	1	0	0	0	0	0	0	2
84	0	0	159.8	88.7	34.7352	16	0	70	5		23	40		14	8	2	0	1	0	1	1	0	0	0	4
73	0	2	168.2	62.6	22.127	27	1	100	5	7.94	31.5	15	34	11	8	0	1	1	0	0	0	1	0	0	4
74	0	2	171.1	78.7	26.8828	29	0	100	3	9.33	42.76	15	34	14	7	0	1	1	0	0	0	0	0	0	1
80	0	1	159.4	63.1	24.8343	22	1	80	7	16	25	40		14	6	1	0	0	1	0	1	0	0	0	2
90	0	2	159.1	67.4	26.6268	20	0	80	3	14.12	18.9	40		12	9	3	0	1	0	0	1	0	0	0	3
78	0	2	167	50	17.9282	27	1	100	4	7.6	20.4	35	10	10	5	3	0	1	0	0	0	0	0	0	1
82	0	5	169	65	22.7583	29	0	100	7	10.47	36.3	15	32	13	1	0	1	1	0	0	1	0	0	0	3
80	0	5	169	69	24.1588	29	0	95	5	9.92	27.1	15		14	17	1	1	1	1	0	1	0	0	1	2
73	0	3	160.8	56.5	21.8513	30	5	100	6	10.8	30.4	15		13	16	2	0	1	1	1	1	0	0	0	2
84	0	2				11		10	0		11.2	60		3	0		0	0	0	0	0	0	0	0
85	0	3	162	60.8	23.1672	18	1	95	2			25		11	8		1	1	0	0	0	0	0	0
73	0	3	160	61	23.8281	30	1	100	5	7	24.6	0	13	14	6	1	0	0	0	0	0	0	0	1	0
81	0	1	160	48	19.15	3		40	0			80		10	11		0	1	1	1	0	0	0	0
66	0	2	164	64	23.7954	25	1	60	1		17.7	50		12	11	4	1	1	1	0	0	0	0	0	4
72	0	2	157.8	72	28.9147	27	0	95	7	21.56	36.2	25	21.7	14	10	2	1	0	1	0	1	0	0	0	2
77	0	2	158.8	50	19.8275	18	2	30	1		26.6	50		7		4	1	1	0	0	0	1	0	0	3
81	0	2	171	71.6	24.4862	18	2	80	2	17.61	23.5	40		14	2	4	0	0	0	1	0	0	0	0	0
76	0	0	169.5	72	25.0607	18	1	90	5	26.74	24.56	15	8.5	10	2	3	1	1	0	0	0	0	0	0	2
79	0	2	162.3	70.8	26.878	27	1	100	4	13.69	30.3	40	24	14	3	0	0	1	0	0	0	0	0	0	1
70	0	3	160.8	53.9	20.8457	29	1	90	2	11.26	26.4	15	22.5	12	0	1	0	0	0	1	0	0	0	1	4
85	0	5	160	58	22.6562	24	1	85	4		24.6	50		10			0	1	0	0	1	0	0	1
79	0	2	167	70	25.0995	26	0	100	6	21	33.6	15	24	14	3	2	1	1	0	0	0	0	0	0	2
74	0	5	156.5	77.6	31.6835	28	0	100	6	7.09	21.2	15	25.4	14	5	1	1	1	0	0	0	0	0	0	2
82	0	3	167	61	21.8724	25	4	90	4		21.6	40		8	8	4	0	0	0	1	1	0	0	0	3
84	0	3	163.4	62.5	23.4086	29	0	75	5		33.1	75		14	6		1	1	0	0	1	0	0	0
85	0	2					0	100	5	9.82	13.7	15	33	14	7	2	0	1	0	1	1	0	0	0	2
84	0	2	168	66	23.3844	11		55	0		12.8	50		9	2	4	1	0	0	0	1	1	0	0	1
73	0	5	169.4	55.7	19.4101	30	0	100	6	8.54	27.5	15	37.7	12	13	0	1	0	0	0	1	0	0	0	3
74	0	2	156	52	21.3675	11		55	0	21	12.1	30	11.6	11	5	4	1	0	1	0	0	1	0	0	2
85	0	2				10	1	40	0		10.6	70		12	4		1	1	1	0	0	1	1	0
83	0	5	156.5	67.4	27.5189	27	0	100	8	9	31.57	0	29.33	14	0	1	0	0	0	0	0	0	0	0	0
86	0	2	169.9	61	21.1321	24	1	90	5	13.31	26.5	15	27	14	6	0	0	1	0	1	0	0	0	0	1
71	0	5	168	65.5	23.2072	24	1	100	5	8.46	30.2	15	34	13	4	1	1	1	0	1	0	1	0	0	3
83	0	2	162	70	26.6728	19	0	90	4			15		14	11		0	0	0	1	0	0	0	0
86	0	5	168.5	66.8	23.5275	27	4	90	5	14.58	33.27	15	15.83	13	11	0	0	0	0	1	0	1	0	1	2
66	0	4	167	69	24.7409	29	0	95	7	10.82	32.9	15	22.8	14	1	0	1	0	0	0	0	0	0	0	1
77	0	4	161	52.7	20.331	20	1	65	0		27	50		10	13	2	1	1	1	0	0	0	0	0	4
85	0	4	165	62	22.77	26	1	95	7	20	25.3	15	17.67	12	3	2	1	0	0	0	0	1	0	0	2
66	0	5	166.5	93.6	33.7635	28	0	100	7	9.98	44.6	15	32	13		0	1	1	0	1	0	0	0	0	3
88	0	4	172	61	20.6193	15	3	45	3		12.1	65		9	10	5	0	1	0	0	0	0	1	1	2
81	0	3	163.3	67.3	25.2373	26	4	90	7	26.82	20.3	80		11	1	3	0	0	0	0	0	0	0	0	0
82	0	2	158.6	61.8	24.5687	18	1	90	1	18.09	25.5	40		10	2	4	0	1	0	0	1	0	0	0	1
91	0	1	164	47.2	17.5491	22	1	90	4		22.2	65		10	9	3	0	1	0	0	0	0	0	0	1
84	0	4	165	90	33.05	27	1	90	7	12	34.1	30	11.66	14	6	1	1	0	0	1	0	0	0	0	1
85	0	5	150	59.3	26.3556	29	2	100	7	13.2	32.8	40	32.8	14	10	3	1	1	0	1	0	0	1	0	3
67	0	5	165.5	80.1	29.244	30	0	100	8	10.56	31.8	15	32	14	11	0	1	1	0	1	0	0	0	0	3
88	0	0	163	43.5	16.3725	25	4	95	6	18.2	15.9	30	21	11	6	4	0	0	0	0	0	0	0	0	0
67	0	4	169	69	24.1588	29	0	100	7	7.4	31.67	40.07	31.67	14	3	1	1	1	0	0	1	0	0	0	1
77	0	2				19	1	50	0		28	75		13	7	3	1	1	1	0	1	1	1	0	4
76	1	3	155	51	21.2279	17	0	100	6	9	15.4	15	18	13	5	4	1	1	0	0	0	1	0	0	2
84	1	2	152.1	43.1	18.6303	23	1	100	5	15.68	12.2	40	23.4	10	7	4	0	0	0	1	1	0	0	0	4
82	1	0	159	48.6	19.2239	25	1	65	1		12.3	40		11	8	4	1	1	0	0	0	1	0	0	6
77	1	5	153.7	63.9	27.0491	30	0	100	7	6.75	24.7	15	37	14	0	0	1	0	0	0	0	1	0	0	3
71	1	4	159.1	74	29.23	30	3	100	8	8.72	22.6	15	28	14	0	0	0	0	1	0	0	1	0	0	2
87	1	0				18	1	75	4	44.8	11.4	40		14	10	4	0	1	0	1	1	0	0	0	5
76	1	5	153.2	74.6	31.7849	30	0	95	8	11.28	24	15	22	14	3	0	0	1	0	0	0	0	0	0	2
78	1	0	148	51	23.2834	20	5	85	3	18	16.6	40		12	5	4	0	1	1	0	0	0	0	0	2
73	1	3	156	57	23.4221	29	2	95	8	7.82	10	15	30	13	3	3	0	0	0	0	0	0	0	0	0
81	1	2	142.2	48.2	23.8368	21	1	90	6	16.2	8.8	25	13.8	13		4	0	1	0	0	0	1	0	0	2
91	1	0		39.2		13	2	20	0		5.5	60		6			0	1	0	1	1	0	0	0
81	0	0	145	55	26.1593	17	3	90	4	9.69	17.3	40	30	13	3	3	0	1	0	0	0	1	0	0	1
85	1	2				28	2	85	1		13.2	65		11	7	4	1	1	0	0	0	0	0	0	3
73	1	3	150	55	24.4444	30	1	90	8	11	20.1	15	21	14	6	0	1	1	0	0	0	0	0	0	4
79	1	4	157.9	52.2	20.9366	30	4	100	6	8.9	17.1	15	17.1	9	4	3	0	1	0	1	0	0	0	0	1
79	1	0				18	0	35	3		12.7	15		14	8		1	1	0	1	1	0	0	0
79	1	5		40.5		15	3	55	1		8.5	60		4	9	5	0	0	0	1	1	1	0	0	5
80	1	0	141.8	54.3	27.0052	19	2	85	4		19.6	30	19.6	12	11	2	0	1	0	1	0	0	0	0	2
78	1	5	146.9	57.4	26.5992	27	3	95	3	10.78	15.5	40	24.5	12	3	2	0	1	1	0	0	0	0	0	2
76	1	1				21	2	100	6	12		15		6	6		1	0	0	0	0	0	0	0
87	1	2				17		50	0		12.1	50		7	5	4	0	1	0	0	1	0	0	0	1
74	1	5	161	49	18.9036	30	0	100	8	9.3	21.13	15	31	11	1	2	1	1	0	0	0	0	0	0	2
87	1	2	148	54	24.653	15	0	75	3		10.2	80		13	1	3	0	1	0	0	0	0	1	0	1
71	1	0	149.7	71.3	31.816	27	0	90	7			25		14	11		1	1	0	0	0	0	0	0
78	1	0	149.2	39	17.5197	23	1	100	8	12	22.4	15		10	2	0	0	0	0	0	0	0	0	0	0
68	1	2	154.7	67.9	28.3719	15	0	100	2	21.9	13.7	15	20.5	11	10	3	1	1	0	0	0	0	0	0	4
68	1	3	158.5	50	19.9027	29	0	100	8	7.52	17.1	0	32	12	5	2	1	0	0	0	1	0	0	1	1
75	1	5	165	60	22.0386	29	2	100	8	10.04	23.8	15	20.5	13	4	0	1	1	0	0	0	0	0	0	2
85	1	0	153.9	73.4	30.9898	13	1	85	5		20.7	65		13	0	2	0	0	0	0	1	0	0	0	3
91	1	2	144.3	49.7	23.8684	24	2	75	2		16.5	65		13		2	0	0	0	1	0	1	0	0	2
65	1	4	153	47	20.0777	25	1	100	8	8.76	16.5	0	31.5	12	2	1	0	0	0	0	0	0	0	0	2
68	1	5	150.1	49	21.7488	23	1	100	8	13.56	20.4	25	22	13	9	3	0	0	0	0	0	1	0	0	7
81	1	0				17	1	75	5		15.5	40		13	12		0	1	0	1	1	0	0	0
71	1	3	152.3	55.3	23.841	29	2	100	8	18.35	18.4	40	19	14	0	0	0	0	0	0	0	0	0	0	0
73	1	5				29	2	100	7	13.4	10.7	15	37	12	9	3	0	1	0	0	0	0	0	0	0
71	1	3	143.5	59	28.6516	30	0	100	8	9.7	19.7	15	26.2	14	5	0	0	1	0	0	0	0	0	0	2
80	1	2	141	45	22.6347	26	0	100	6	12.3	13.6	15	23.4	14	9	2	1	1	1	1	1	0	0	0	2
76	0	4	159.6	75.8	29.758	26	0	100	8	11.02	11.4	15	26.4	12	9	2	1	1	0	0	1	0	0	0	2
81	1	2	157.3	62.9	25.421	28	0	95	6	15.25	22.6	40	22	14	6	0	1	1	1	0	1	0	0	0	3
85	1	4	155	47	19.563	28	4	95	7	11	16.9	15		10	5	4	0	0	0	0	0	0	0	0	2
77	1	2	153	53.1	22.6836	13	0	100	5	18.06	14.17	30		13	11	4	1	1	0	0	0	0	0	0	3
73	1	0	155	80	33.2986	24	0	80	7	10	12.6	40		14	5	1	1	1	0	0	1	0	0	0	2
66	1	2	147.9	43.8	20.0234	23	0	100	8	7.98	20.8	40	28.17	40	2	0	0	0	0	0	0	0	0	0	0
78	1	3	154.4	57.5	24.1198	29	5	90	7		13.7	40		14		3	0	1	0	0	0	0	0	0	3
65	1	2	155	47.9	19.9376	25	1	95	8	7.9	14.8	40	16	12	12	2	1	1	0	0	1	0	0	0	3
74	1	3	149	59	26.5754	27	0	100	8	14.07	19.6	25	31.8	14	1	2	0	1	1	0	0	0	0	0	3
77	1	2	156	60	24.6548	24	0	90	5	17.19	18.87	15	31.5	14	9	0	1	1	0	0	0	0	0	0	2
71	1	2	151.6	46.5	20.2327	29	1	100	8	11.79	17.3	15	31.4	9		1	0	0	0	0	0	0	0	0	0
[truncated: 395 more rows]

## Sheet: codebook
gender	0	male
	1	female
educational level	0	Illiterate
	1	Literate
	2	Primary school
	3	Junior high school
	4	Senior high school
	5	University
MMSE	Mini-mental state examination
GDS-5	5-item Geriatric Depression Scale
ADL	Barthel index
IADL	Lawton scale
TUG	Timed Up and Go test
HGS	Hand Grip Strength
Morse	Morse Fall Scale
FRT	Functional Reach Test
MNA-SF	mini-nutritional assessment short-form
Polypharmacy
CHS	frailty phenotype of Cardiovascular Health Study
DM	Diabetes Mellitus
HTN	hypertension
CVA	Cerebrovascular Accident
CAD	Coronary heart disease
CKD	Chronic kidney disease
Dementia
Parkinson
COPD	Chronic Obstructive Pulmonary Disease
CCI	Charlson Comorbidity Index
